# Supplementary material for: CuCl-catalyzed ortho trifluoromethylation of arenes and heteroarenes with a pivalamido directing group
Source: Royal Society of Chemistry journal article supplement (doi:10.1039/c3cc41331d), 2013-01-01
Supplement: c3cc41331d.pdf [file c3cc41331d.pdf]

# CuCl-Catalyzed *Ortho* Trifluoromethylation of Arenes and Heteroarenes with Pivalamido Directing Group Shangjun Cai,<sup>a</sup>

Chao Chen,<sup>\*a</sup> Zelin Sun,<sup>a</sup> Chanjuan Xi<sup>\*a,b</sup>

<sup>a</sup> Key Laboratory of Bioorganic Phosphorus Chemistry & Chemical Biology (Ministry of Education), Department of Chemistry, Tsinghua University, Beijing 100084, China

<sup>b</sup> State Key Laboratory of Elemento-Organic Chemistry, Nankai University, Tianjin 300071, China

Chenchao01@mails.tsinghua.edu.cn; cjxi@tsinghua.edu.cn

## List of the contents:

|                                                                                   |     |
|-----------------------------------------------------------------------------------|-----|
| 1. General Comments.....                                                          | S2  |
| 2. Preparation for Starting Materials.....                                        | S3  |
| 3. Reaction Condition Optimization.....                                           | S5  |
| 4. Experimental Section.....                                                      | S7  |
| 5. Crystal Structure of 5b.....                                                   | S15 |
| 6. Crystal Structure of 3c.....                                                   | S16 |
| 7. Crystal Structure of Cupric Iodobenzoate 6.....                                | S17 |
| 8. Capture of Trifluoromethyl Radical by EPR.....                                 | S18 |
| 9. Copies of <sup>1</sup> H, <sup>13</sup> C and <sup>19</sup> F NMR Spectra..... | S19 |
| 10. References.....                                                               | S70 |

## 1. General Comments

All the reactions were carried out in pre-dried a screwcapped tube with a Teflon-lined septum under N<sub>2</sub> atmosphere. Togni reagent was prepared according to the literatures<sup>[1]</sup>. All of the solvents were fresh distilled. Column chromatography was performed on silica gel (particle size 10-40 μm, Ocean Chemical Factory of Qingdao, China). <sup>1</sup>H NMR and <sup>13</sup>C NMR spectra were recorded on a JEOL AL-400MHz spectrometer at ambient temperature with CDCl<sub>3</sub> as the solvent. Chemical shifts (δ) were given in ppm, referenced to the residual proton resonance of CDCl<sub>3</sub> (7.26), to the carbon resonance of CDCl<sub>3</sub> (77.16). Coupling constants (*J*) were given in Hertz (Hz). The term m, dq, q, t, d, s referred to multiplet, doublet quartet, quartet, triplet, doublet, singlet. Mass spectra were obtained using Bruker Esquire ion trap mass spectrometer in positive mode. The reaction progress was monitored by <sup>19</sup>F NMR. <sup>19</sup>F NMR yields, using fluorobenzene as internal standard, were obtained in proportion to the integral area of fluorobenzene signal.

## 2. Preparation for Starting Materials

### 1) Preparation for N-Arylpivalamides

A sealed tube was charged with the mixture of Anilines (10 mmol), Et<sub>3</sub>N (10 mmol), and stirred in EtOAc (15 mL) at room temperature, then Pivaloyl anhydride (10 mmol) was added. The tube was sealed and the mixture was allowed to stir at 40-80 °C overnight. After completion, the mixture was cooled to room temperature, then water (15 mL) was added and the mixture was extracted with EtOAc (15 mL x 2), dried by anhydrous Na<sub>2</sub>SO<sub>4</sub>. Evaporation of the solvent followed by recrystallization (petroleum ether and methanol as the solvents) provided the corresponding product.

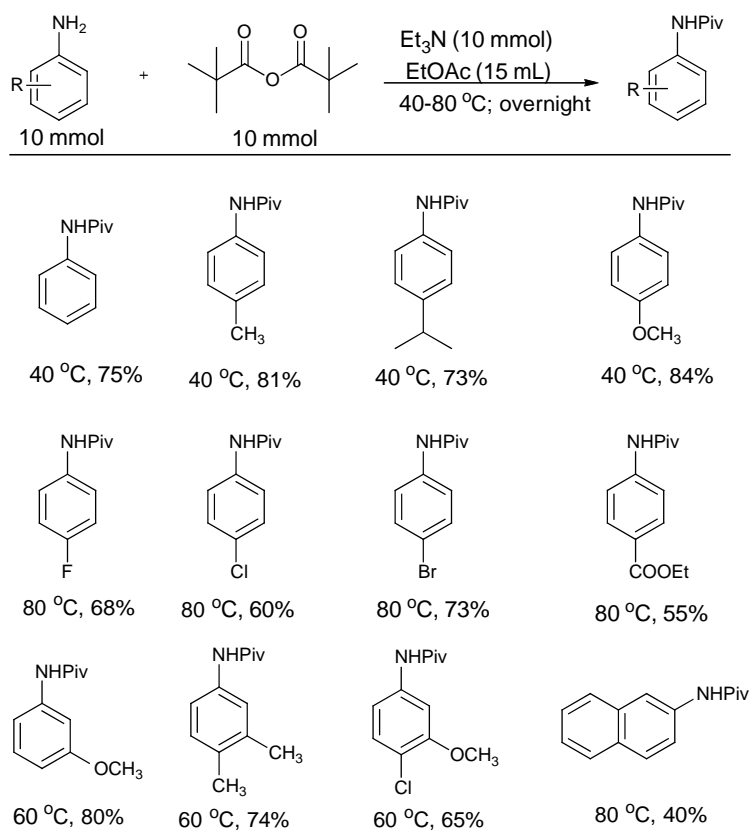

## 2) Preparation for NHPiv-substituted heterocyclic compounds

A sealed tube was charged with the mixture of Halogenated heterocyclic compounds (5 mmol), Pivalamide (5 mmol), CuI (0.5 mmol, 100 mg) and K<sub>3</sub>PO<sub>4</sub> (10 mmol, 2.12 g), then DMEDA (0.5 mmol, 54 µL) and DMF (4 mL) were added under nitrogen atmosphere. The tube was sealed and the mixture was allowed to stir at 120 °C for 24 h. After completion, the mixture was cooled to room temperature, then water (30 mL) was added and the mixture was extracted with EtOAc (30 mL x 3), dried by anhydrous Na<sub>2</sub>SO<sub>4</sub>. Evaporation of the solvent followed by purification on silica gel (petroleum ether/ethyl acetate = 5/1) provided the corresponding product.

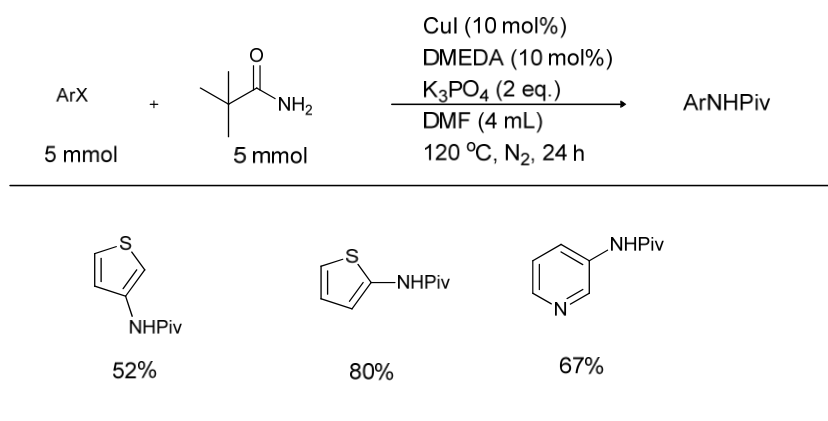

### 3. Reaction Condition Optimization

Screening the protecting-group:

| No. | R   | Catalyst | Solvent (1 mL) | Base                                    | T (°C) | Time (h) | Yield (%) | Yield <sup>a</sup> |
|-----|-----|----------|----------------|-----------------------------------------|--------|----------|-----------|--------------------|
| 1   | Piv | 10% CuCl | EtOAc          |                                         | 60     | 24       | 100%      |                    |
| 2   | Piv | 10% CuCl | Ac             |                                         | 30     | 24       | 100%      |                    |
| 3   | Piv | 10% CuCl | OH             | (2 eq.) 1,2,2,6,6-tetramethylpiperidine | 30     | 24       | n.r.      |                    |
| 4   | Piv | 10% CuCl | OH             | NaO <sub>4</sub>                        | 30     | 24       | 100%      |                    |
| 5   | Piv | 10% CuCl | OH             | (0.5 eq.) CsF                           | 30     | 24       | 100%      |                    |
| 6   | Boc | 10% CuCl | OH             |                                         | 30     | 24       | 100%      |                    |
| 7   |     | 10% CuCl | <i>t</i> -BuOH |                                         | 30     | 24       | 20%       |                    |
| 8   | Ac  | 20% CuCl | <i>t</i> -BuOH |                                         | 30     | 24       | 17%       |                    |

<sup>a</sup> GC yield of major product.

Screening the reaction conditions for producing **3a**:

| No.             | Solvent                              | Temp. | Conversion | ratio of 3a: 4a: 5a |
|-----------------|--------------------------------------|-------|------------|---------------------|
| 1               | CH <sub>3</sub> OH                   | 30 °C | 54%        | 32% :15% :7%        |
| 2               | EtOAc                                | 30 °C | 87%        | 58% :23% :6%        |
| 3               | CH <sub>3</sub> CN                   | 30 °C | 83%        | 50% :22% :11%       |
| 4               | 1,4-dioxane                          | 30 °C | 43%        | 28% :10% :5%        |
| 5               | CHCl <sub>3</sub>                    | 30 °C | 82%        | 47% :23% :12%       |
| 6               | <i>t</i> -BuOH                       | 30 °C | 93%        | 67% :17% :9%        |
| 7               | CH <sub>2</sub> OHCH <sub>2</sub> OH | 30 °C | trace      |                     |
| 8               | Toluene                              | 30 °C | trace      |                     |
| 9               | THF                                  | 30 °C | trace      |                     |
| 10              | <i>t</i> -BuOH                       | 60 °C | 94%        | 62% :24% :8%        |
| 11 <sup>a</sup> | <i>t</i> -BuOH                       | 30 °C | 88%        | 55% :23% :10%       |
| 12 <sup>b</sup> | <i>t</i> -BuOH                       | 30 °C | 56%        | 40% :11% :5%        |
| 13 <sup>c</sup> | <i>t</i> -BuOH                       | 30 °C | 69%        | 48% :13% :8%        |

<sup>a</sup> 0.04 mmol of glycol was added as ligand. <sup>b</sup> 0.04 mmol of 1,10-phen was added as ligand. <sup>c</sup> 0.04 mmol of DMEDA was added as ligand.

Screening the reaction conditions for producing **3b**:

| No.            | Catalyst   | Solvent            | mL | Ligand               | Time(h) | MS Yield <sup>a</sup> |
|----------------|------------|--------------------|----|----------------------|---------|-----------------------|
| 1 <sup>b</sup> | 20% CuCl   | CH <sub>2</sub> OH |    | 20% PPh <sub>3</sub> | 60      | 12%                   |
| 2 <sup>b</sup> | 20% CuI    | CH <sub>2</sub> OH |    | 20% PPh <sub>3</sub> | 60      | 24%                   |
| 3 <sup>b</sup> | 20% CuCl   | CH <sub>2</sub> OH |    | 20% PPh <sub>3</sub> | 60      | 24%                   |
| 4              | 20% CuCl   | CH <sub>2</sub> OH |    | 20% PPh <sub>3</sub> | 60      | 24%                   |
| 5              | 20% CuCl   | CH <sub>2</sub> OH |    |                      | 80      | 24%                   |
| 6              | 20% CuCl   | CH <sub>3</sub> CN |    |                      | 80      | 24%                   |
| 7              | 20% CuCl   | THF                |    |                      | 80      | 24%                   |
| 8              | 20% CuCl   | EtOAc              |    |                      | 80      | 24%                   |
| 9              | 20% CuCl   | MF                 |    |                      | 80      | 24%                   |
| 10             | 20% CuCl   | DCE                |    |                      | 80      | 24%                   |
| 11             | 20% CuCl   | 1,2-OH             |    |                      | 80      | 24%                   |
| 12             | 20% CuCl   | DCM                |    |                      | 80      | 24%                   |
| 13             | 20% CuCl   | EtOAc              |    |                      | 80      | 24%                   |
| 14             | 20% CuCl   | EtOAc              |    |                      | 80      | 24%                   |
| 15             | 1 eq. CuCl | EtOAc              |    |                      | 80      | 24%                   |
| 16             | 20% CuCl   | EtOAc              |    | 20% 1,10-Phen        | 80      | 24%                   |
| 17             | 20% CuCl   | EtOAc              |    | 20% MEDA             | 80      | 24%                   |
| 18             | 20% CuCl   | EtOAc              |    | 20% TMEDA            | 80      | 24%                   |
| 19             | 20% CuCl   | <i>t</i> -BuOH     |    |                      | 30      | 24%                   |
| 20             | 20% CuCl   | <i>t</i> -BuOH     |    |                      | 60      | 24%                   |

<sup>a</sup> GC-MS yield of major product. <sup>b</sup> mmol to 1 mmol reagent.

GC yield of the major product **3a** after different periods:

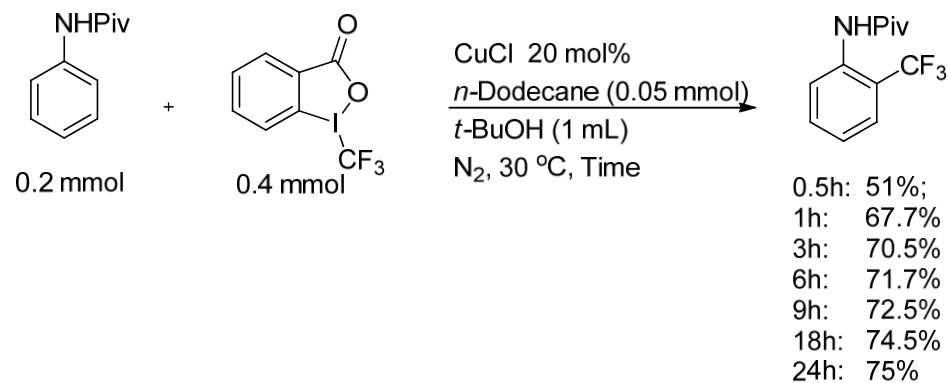

#### 4. Experimental Section

##### General procedure for the synthesis of N-(2-(trifluoromethyl)aryl)pivalamide

A sealed tube was charged with the mixture of N-Arylpivalamide **1** (0.4 mmol), togni reagent **2** (0.8 mmol, 252.8 mg), CuCl (0.08 mmol, 8 mg), then stirred in *t*-BuOH (1 mL) at room temperature under nitrogen atmosphere. Half an hour later, the tube was sealed and the mixture was allowed to stir at 30-120 °C for indicated time. After completion, the mixture was cooled to room temperature, then NaHCO<sub>3</sub> aq. (5 mL) was added and the mixture was extracted with EtOAc (5 mL x 3), dried by anhydrous Na<sub>2</sub>SO<sub>4</sub>. Evaporation of the solvent followed by purification on silica gel chromatography (petroleum ether/dichloromethane/ethyl acetate = 40/3/1) provided the corresponding product **3**.

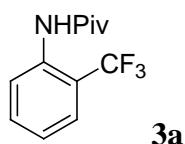

**N-(2-(trifluoromethyl)phenyl)pivalamide**<sup>[21]</sup>: White Solid, 63 mg (65% yield); <sup>1</sup>H NMR (CDCl<sub>3</sub>, 400 MHz): δ 1.32 (s, 9H), 7.20 (t, *J*<sub>H-H</sub> = 7.6 Hz, 1H), 7.54 (t, *J*<sub>H-H</sub> = 7.9 Hz, 1H), 7.59 (d, *J*<sub>H-H</sub> = 7.9 Hz, 1H), 7.79 (s, 1H), 8.24 (d, *J*<sub>H-H</sub> = 8.3 Hz, 1H); <sup>13</sup>C NMR (CDCl<sub>3</sub>, 101 MHz): δ 27.5, 40.0, 120.0 (q, *J*<sub>F-C</sub> = 29.5 Hz), 124.2, 124.3, 124.4 (q, *J*<sub>F-C</sub> = 272.8 Hz), 126.1 (q, *J*<sub>F-C</sub> = 5.4 Hz), 133.0, 135.8, 176.8; <sup>19</sup>F NMR (CDCl<sub>3</sub>, 376 MHz): δ -60.69 (s); ESI-MS: [M+ Na]<sup>+</sup> *m/z* 268.1; HRMS: calculated for C<sub>12</sub>H<sub>14</sub>F<sub>3</sub>NO[M+H<sup>+</sup>]: 246.1100; found, 246.1101.

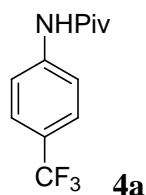

**N-(4-(trifluoromethyl)phenyl)pivalamide**<sup>[3]</sup>: White Solid, 15 mg (15% yield), <sup>1</sup>H NMR (CDCl<sub>3</sub>, 400 MHz): δ 1.32 (s, 9H), 7.49 (s, 1H), 7.55 (d, *J*<sub>H-H</sub> = 8.6 Hz, 2H), 7.65 (d, *J*<sub>H-H</sub> = 8.6 Hz, 2H); <sup>19</sup>F NMR (CDCl<sub>3</sub>, 376 MHz): δ -61.98 (s); ESI-MS: [M+ Na]<sup>+</sup> *m/z* 268.2.

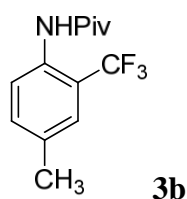

**N-(4-methyl-2-(trifluoromethyl)phenyl)pivalamide**: White Solid, 71 mg (69% yield); <sup>1</sup>H NMR (CDCl<sub>3</sub>, 400 MHz): δ 1.31 (s, 9H), 2.35 (s, 3H), 7.34 (d, *J*<sub>H-H</sub> = 8.5 Hz, 1H), 7.39 (s, 1H), 7.70 (s, 1H), 8.05 (d, *J*<sub>H-H</sub> = 8.5 Hz, 1H); <sup>13</sup>C NMR (CDCl<sub>3</sub>, 101 MHz): δ 20.9, 27.5, 39.8, 120.2 (q, *J*<sub>F-C</sub> = 29.0 Hz), 124.4 (q, *J*<sub>F-C</sub> = 273.0 Hz), 124.7, 126.4 (q, *J*<sub>F-C</sub> = 5.3 Hz), 133.1, 133.4, 134.3, 176.8; <sup>19</sup>F NMR (CDCl<sub>3</sub>, 376 MHz): δ -60.66 (s); ESI-MS: [M+ Na]<sup>+</sup> *m/z* 282.1; HRMS: calculated for C<sub>13</sub>H<sub>16</sub>F<sub>3</sub>NO[M+Na<sup>+</sup>]: 260.1257; found, 260.1258.

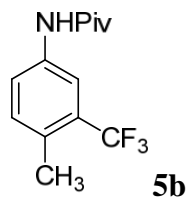

**N-(4-methyl-3-(trifluoromethyl)phenyl)pivalamide**: White Solid, 13 mg (13% yield); <sup>1</sup>H NMR (CDCl<sub>3</sub>, 400 MHz): δ 1.31 (s, 9H), 2.43 (s, 3H), 7.22 (d, *J*<sub>H-H</sub> = 8.3 Hz, 1H), 7.39 (s, 1H), 7.65 (d, *J*<sub>H-H</sub> = 8.3 Hz, 1H), 7.73 (s, 1H); <sup>13</sup>C NMR (CDCl<sub>3</sub>, 101 MHz): δ 18.8, 27.6, 39.7, 117.6 (q, *J*<sub>F-C</sub> = 5.8 Hz), 123.1, 124.3 (q, *J*<sub>F-C</sub> = 273.9

Hz), 129.3 (q,  $J_{\text{F-C}} = 29.9$  Hz), 132.2, 132.5, 136.0, 176.9;  $^{19}\text{F}$  NMR ( $\text{CDCl}_3$ , 376 MHz):  $\delta$  -61.77 (s); ESI-MS:  $[\text{M} + \text{Na}]^+ m/z$  282.1.

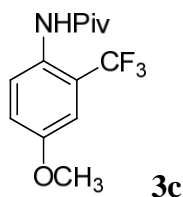

**N-(4-methoxy-2-(trifluoromethyl)phenyl)pivalamide:** White Solid, 68 mg (63% yield);  $^1\text{H}$  NMR ( $\text{CDCl}_3$ , 400 MHz):  $\delta$  1.30 (s, 9H), 3.82 (s, 3H), 7.06 (d,  $J_{\text{H-H}} = 9.0$  Hz, 1H), 7.11 (s, 1H), 7.56 (s, 1H), 7.95 (d,  $J_{\text{H-H}} = 9.0$  Hz, 1H);  $^{13}\text{C}$  NMR ( $\text{CDCl}_3$ , 101 MHz):  $\delta$  27.5, 39.7, 55.8, 111.7 (q,  $J_{\text{F-C}} = 5.4$  Hz), 117.7, 122.4 (q,  $J_{\text{F-C}} = 28.8$  Hz), 123.9 (q,  $J_{\text{F-C}} = 272.1$  Hz), 127.3, 128.3, 156.4, 176.9;  $^{19}\text{F}$  NMR ( $\text{CDCl}_3$ , 376 MHz):  $\delta$  -61.95 (s); ESI-MS:  $[\text{M} + \text{Na}]^+ m/z$  298.1.

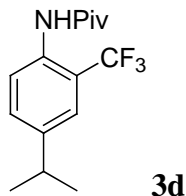

**N-(4-isopropyl-2-(trifluoromethyl)phenyl)pivalamide:** White Solid, 63 mg (55% yield);  $^1\text{H}$  NMR ( $\text{CDCl}_3$ , 400 MHz):  $\delta$  1.24 (d,  $J_{\text{H-H}} = 6.9$  Hz, 6H), 1.31 (s, 9H), 2.92 (sept,  $J_{\text{H-H}} = 6.9$  Hz, 1H), 7.40 (d,  $J_{\text{H-H}} = 8.6$  Hz, 1H), 7.43 (s, 1H), 7.71 (s, 1H), 8.08 (d,  $J_{\text{H-H}} = 8.5$  Hz, 1H);  $^{13}\text{C}$  NMR ( $\text{CDCl}_3$ , 101 MHz):  $\delta$  23.9, 27.5, 33.7, 39.9, 120.2 (q,  $J_{\text{F-C}} = 29.0$  Hz), 123.9 (q,  $J_{\text{F-C}} = 5.2$  Hz), 124.5 (q,  $J_{\text{F-C}} = 273.1$  Hz), 124.8, 130.9, 133.4, 145.3, 176.8;  $^{19}\text{F}$  NMR ( $\text{CDCl}_3$ , 376 MHz):  $\delta$  -60.54 (s); ESI-MS:  $[\text{M} + \text{Na}]^+ m/z$  310.1.

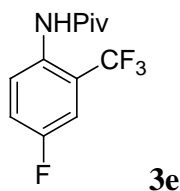

**N-(4-fluoro-2-(trifluoromethyl)phenyl)pivalamide:** White Solid, 44 mg (42% yield);  $^1\text{H}$  NMR ( $\text{CDCl}_3$ , 400 MHz):  $\delta$  1.31 (s, 9H), 7.21-7.28 (m, 1H), 7.31 (dd,  $J = 8.5, 2.9$  Hz, 1H), 7.67 (s, 1H), 8.14 (dd,  $J = 9.1, 5.0$  Hz, 1H);  $^{13}\text{C}$  NMR ( $\text{CDCl}_3$ , 101 MHz):  $\delta$  27.4, 39.9, 113.4 (dq,  $J_{\text{F-C}} = 26.0, 5.4$  Hz), 119.7 (d,  $J_{\text{F-C}} = 21.8$  Hz), 122.1 (dq,  $J_{\text{F-C}} = 30.5, 7.6$  Hz), 123.4 (q,  $J_{\text{F-C}} = 273.2$  Hz), 127.1 (d,  $J_{\text{F-C}} = 7.7$  Hz), 131.9, 158.7 (d,  $J_{\text{F-C}} = 246.4$  Hz), 176.9;  $^{19}\text{F}$  NMR ( $\text{CDCl}_3$ , 376 MHz):  $\delta$  -115.85 (s), -61.28 (s); ESI-MS:  $[\text{M} + \text{Na}]^+ m/z$  286.1.

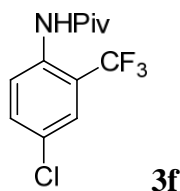

**N-(4-chloro-2-(trifluoromethyl)phenyl)pivalamide:** White Solid, 36 mg (32% yield);  $^1\text{H}$  NMR ( $\text{CDCl}_3$ , 400 MHz):  $\delta$  1.31 (s, 9H), 7.50 (d,  $J_{\text{H-H}} = 9.0$  Hz, 1H), 7.57 (s, 1H), 7.75 (s, 1H), 8.23 (d,  $J_{\text{H-H}} = 9.0$  Hz, 1H);  $^{13}\text{C}$  NMR ( $\text{CDCl}_3$ , 101 MHz):  $\delta$  27.4, 40.0, 121.2 (q,  $J_{\text{F-C}} = 30.5$  Hz), 123.5 (q,  $J_{\text{F-C}} = 273.3$  Hz), 125.6, 126.2 (q,  $J_{\text{F-C}} = 5.5$  Hz), 129.6, 132.9, 134.5, 176.8;  $^{19}\text{F}$  NMR ( $\text{CDCl}_3$ , 376 MHz):  $\delta$  -61.12 (s); ESI-MS:  $[\text{M} + \text{Na}]^+ m/z$  302.1, 304.2.

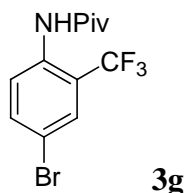

**N-(4-bromo-2-(trifluoromethyl)phenyl)pivalamide:** Light Yellow Solid, 63 mg (49% yield);  $^1\text{H}$  NMR ( $\text{CDCl}_3$ , 400 MHz):  $\delta$  1.31 (s, 9H), 7.65 (dd,  $J_{\text{H-H}} = 8.9, 1.9$  Hz,

1H), 7.72 (d,  $J_{\text{H-H}} = 1.9$  Hz, 1H), 7.75 (s, 1H), 8.19 (d,  $J_{\text{H-H}} = 8.8$  Hz, 1H);  $^{13}\text{C}$  NMR ( $\text{CDCl}_3$ , 101 MHz):  $\delta$  27.4, 40.1, 116.8, 121.3 (q,  $J_{\text{F-C}} = 30.0$  Hz), 123.4 (q,  $J_{\text{F-C}} = 273.7$  Hz), 125.7, 129.1 (q,  $J_{\text{F-C}} = 5.5$  Hz), 135.0, 135.9, 176.8;  $^{19}\text{F}$  NMR ( $\text{CDCl}_3$ , 376 MHz):  $\delta$  -61.06 (s); ESI-MS:  $[\text{M} + \text{Na}]^+ m/z$  346.1, 348.0.

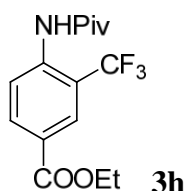

**ethyl 4-pivalamido-3-(trifluoromethyl)benzoate:** Oil, 38 mg (30% yield);  $^1\text{H}$  NMR ( $\text{CDCl}_3$ , 400 MHz):  $\delta$  1.32 (s, 9H), 1.40 (t,  $J_{\text{H-H}} = 7.2$  Hz, 3H), 4.38 (q,  $J_{\text{H-H}} = 7.2$  Hz, 2H), 7.98 (s, 1H), 8.19 (d,  $J_{\text{H-H}} = 8.7$  Hz, 1H), 8.28 (s, 1H), 8.50 (d,  $J_{\text{H-H}} = 8.7$  Hz, 1H);  $^{13}\text{C}$  NMR ( $\text{CDCl}_3$ , 101 MHz):  $\delta$  14.4, 27.4, 40.3, 61.5, 118.7 (q,  $J_{\text{F-C}} = 30.1$  Hz), 122.6, 124.0 (q,  $J_{\text{F-C}} = 272.4$  Hz), 125.8, 127.8 (q,  $J_{\text{F-C}} = 5.3$  Hz), 134.3, 139.8, 165.1, 176.8;  $^{19}\text{F}$  NMR ( $\text{CDCl}_3$ , 376 MHz):  $\delta$  -60.88 (s); ESI-MS:  $[\text{M} + \text{Na}]^+ m/z$  340.1.

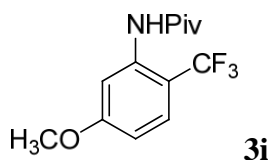

**N-(5-methoxy-2-(trifluoromethyl)phenyl)pivalamide:** Oil, 44 mg (40% yield);  $^1\text{H}$  NMR ( $\text{CDCl}_3$ , 400 MHz):  $\delta$  1.31 (s, 9H), 3.85 (s, 3H), 6.69 (d,  $J_{\text{H-H}} = 8.6$  Hz, 1H), 7.47 (d,  $J_{\text{H-H}} = 8.8$  Hz, 1H), 7.85 (s, 1H), 7.99 (s, 1H);  $^{13}\text{C}$  NMR ( $\text{CDCl}_3$ , 101 MHz):  $\delta$  27.4, 40.1, 55.7, 108.0, 110.4, 111.4 (q,  $J_{\text{F-C}} = 29.8$  Hz), 124.8 (q,  $J_{\text{F-C}} = 271.8$  Hz), 127.3 (q,  $J_{\text{F-C}} = 5.0$  Hz), 137.6, 163.0, 176.9;  $^{19}\text{F}$  NMR ( $\text{CDCl}_3$ , 376 MHz):  $\delta$  -59.25 (s); ESI-MS:  $[\text{M} + \text{Na}]^+ m/z$  298.1.

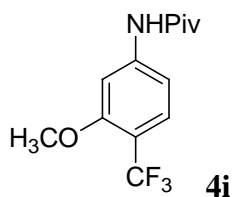

**N-(3-methoxy-4-(trifluoromethyl)phenyl)pivalamide:** White Solid, 17 mg (16% yield);  $^1\text{H}$  NMR ( $\text{CDCl}_3$ , 400 MHz):  $\delta$  1.33 (s, 9H), 3.90 (s, 3H), 6.80 (d,  $J_{\text{H-H}} = 8.3$  Hz, 1H), 7.45 (d,  $J_{\text{H-H}} = 8.3$  Hz, 1H), 7.46 (s, 1H), 7.76 (s, 1H);  $^{13}\text{C}$  NMR ( $\text{CDCl}_3$ , 101 MHz):  $\delta$  27.7, 40.0, 56.1, 103.6, 110.1, 114.2 (q,  $J_{\text{F-C}} = 31.2$  Hz), 123.8 (q,  $J_{\text{F-C}} = 271.6$  Hz), 127.6 (q,  $J_{\text{F-C}} = 5.0$  Hz), 142.9, 158.5, 177.2;  $^{19}\text{F}$  NMR ( $\text{CDCl}_3$ , 376 MHz):  $\delta$  -61.77 (s); ESI-MS:  $[\text{M} + \text{Na}]^+ m/z$  298.4.

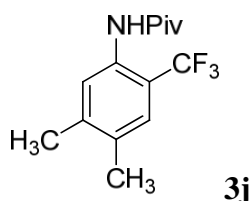

**N-(4,5-dimethyl-2-(trifluoromethyl)phenyl)pivalamide:** Oil, 52 mg (48% yield);  $^1\text{H}$  NMR ( $\text{CDCl}_3$ , 400 MHz):  $\delta$  1.31 (s, 9H), 2.25 (s, 3H), 2.29 (s, 3H), 7.33 (s, 1H), 7.67 (s, 1H), 7.97 (s, 1H);  $^{13}\text{C}$  NMR ( $\text{CDCl}_3$ , 101 MHz):  $\delta$  19.4, 20.1, 27.5, 39.9, 117.8 (q,  $J_{\text{F-C}} = 29.2$  Hz), 124.6 (q,  $J_{\text{F-C}} = 272.5$  Hz), 125.7, 126.8 (q,  $J_{\text{F-C}} = 5.2$  Hz), 133.0, 133.2, 142.0, 176.8;  $^{19}\text{F}$  NMR ( $\text{CDCl}_3$ , 376 MHz):  $\delta$  -60.05 (s); ESI-MS:  $[\text{M} + \text{Na}]^+ m/z$  296.1.

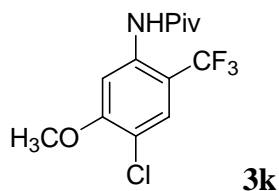

**N-(4-chloro-5-methoxy-2-(trifluoromethyl)phenyl)pivalamide:** White Solid, 49 mg (40% yield);  $^1\text{H}$  NMR ( $\text{CDCl}_3$ , 400 MHz):  $\delta$  1.32 (s, 9H), 3.96 (s, 3H), 7.56 (s, 1H), 7.87 (s, 1H), 8.17 (s, 1H);  $^{13}\text{C}$  NMR ( $\text{CDCl}_3$ , 101 MHz):  $\delta$  27.4, 40.3, 56.6, 106.7,

111.6 (q,  $J_{\text{F-C}} = 30.7$  Hz), 117.2, 124.0 (q,  $J_{\text{F-C}} = 272.1$  Hz), 127.5 (q,  $J_{\text{F-C}} = 5.4$  Hz), 136.2, 158.1, 177.1;  $^{19}\text{F}$  NMR ( $\text{CDCl}_3$ , 376 MHz):  $\delta$  -59.46 (s); ESI-MS:  $[\text{M} + \text{Na}]^+$   $m/z$  332.0, 334.1.

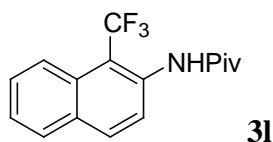

**N-(1-(trifluoromethyl)naphthalen-2-yl)pivalamide:** Light Yellow Solid, 63 mg (54% yield);  $^1\text{H}$  NMR ( $\text{CDCl}_3$ , 400 MHz):  $\delta$  1.36 (s, 9H), 7.50 (t,  $J_{\text{H-H}} = 7.8$  Hz, 1H), 7.58 (t,  $J_{\text{H-H}} = 6.9$  Hz, 1H), 7.84 (d,  $J_{\text{H-H}} = 8.0$  Hz, 1H), 7.95 (d,  $J_{\text{H-H}} = 9.1$  Hz, 1H), 8.10 (d,  $J_{\text{H-H}} = 9.1$  Hz, 1H), 8.18 (d,  $J_{\text{H-H}} = 7.2$  Hz, 2H);  $^{13}\text{C}$  NMR ( $\text{CDCl}_3$ , 101 MHz):  $\delta$  27.5, 40.0, 114.3 (q,  $J_{\text{F-C}} = 27.4$  Hz), 123.8, 124.5 (q,  $J_{\text{F-C}} = 4.7$  Hz), 125.9, 128.0, 128.7, 125.9 (q,  $J_{\text{F-C}} = 275.3$  Hz), 130.1, 131.4, 133.0, 135.6, 177.1;  $^{19}\text{F}$  NMR ( $\text{CDCl}_3$ , 376 MHz):  $\delta$  -50.98 (s); ESI-MS:  $[\text{M} + \text{Na}]^+$   $m/z$  318.1.

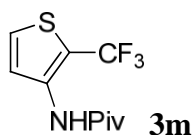

**N-(2-(trifluoromethyl)thiophen-3-yl)pivalamide:** White Solid, 86 mg (86% yield);  $^1\text{H}$  NMR ( $\text{CDCl}_3$ , 400 MHz):  $\delta$  1.30 (s, 9H), 7.41 (d,  $J_{\text{H-H}} = 5.5$  Hz, 1H), 7.93 (d,  $J_{\text{H-H}} = 5.5$  Hz, 2H);  $^{13}\text{C}$  NMR ( $\text{CDCl}_3$ , 101 MHz):  $\delta$  27.5, 39.7, 111.5 (q,  $J_{\text{F-C}} = 36.3$  Hz), 123.3 (q,  $J_{\text{F-C}} = 268.3$  Hz), 123.8, 127.5, 137.6, 175.8;  $^{19}\text{F}$  NMR ( $\text{CDCl}_3$ , 376 MHz):  $\delta$  -53.50 (s); ESI-MS:  $[\text{M} + \text{Na}]^+$   $m/z$  274.1.

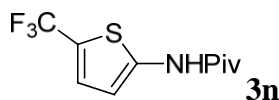

**N-(5-(trifluoromethyl)thiophen-2-yl)pivalamide:** White Solid, 52 mg (52% yield);  $^1\text{H}$  NMR ( $\text{CDCl}_3$ , 400 MHz):  $\delta$  1.33 (s, 9H), 6.57 (d,  $J_{\text{H-H}} = 3.8$  Hz, 1H), 7.19 (d,  $J_{\text{H-H}}$

= 3.8 Hz, 1H), 8.23 (s, 1H);  $^{13}\text{C}$  NMR ( $\text{CDCl}_3$ , 101 MHz):  $\delta$  27.5, 39.1, 109.9, 122.9 (q,  $J_{\text{F-C}} = 38.0$  Hz), 123.2 (q,  $J_{\text{F-C}} = 268.1$  Hz), 125.6 (q,  $J_{\text{F-C}} = 4.0$  Hz), 142.4, 175.4;  $^{19}\text{F}$  NMR ( $\text{CDCl}_3$ , 376 MHz):  $\delta$  -54.67 (s); ESI-MS:  $[\text{M} + \text{Na}]^+$   $m/z$  274.1.

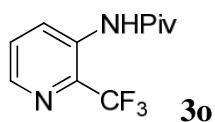

**N-(2-(trifluoromethyl)pyridin-3-yl)pivalamide:** Light Yellow Solid, 50 mg (51% yield);  $^1\text{H}$  NMR ( $\text{CDCl}_3$ , 400 MHz):  $\delta$  1.36 (s, 9H), 7.50 (dd,  $J_{\text{H-H}} = 8.4, 4.5$  Hz, 1H), 7.88 (s, 1H), 8.41 (d,  $J_{\text{H-H}} = 4.5$  Hz, 1H), 8.71 (d,  $J_{\text{H-H}} = 8.4$  Hz, 1H);  $^{13}\text{C}$  NMR ( $\text{CDCl}_3$ , 101 MHz):  $\delta$  27.4, 40.2, 122.4 (q,  $J_{\text{F-C}} = 274.9$  Hz), 127.2, 131.6, 133.4, 136.3 (q,  $J_{\text{F-C}} = 32.4$  Hz), 144.3, 177.2;  $^{19}\text{F}$  NMR ( $\text{CDCl}_3$ , 376 MHz):  $\delta$  -64.35 (s); ESI-MS:  $[\text{M} + \text{Na}]^+$   $m/z$  269.3.

## 5. Crystal Structure of 5b

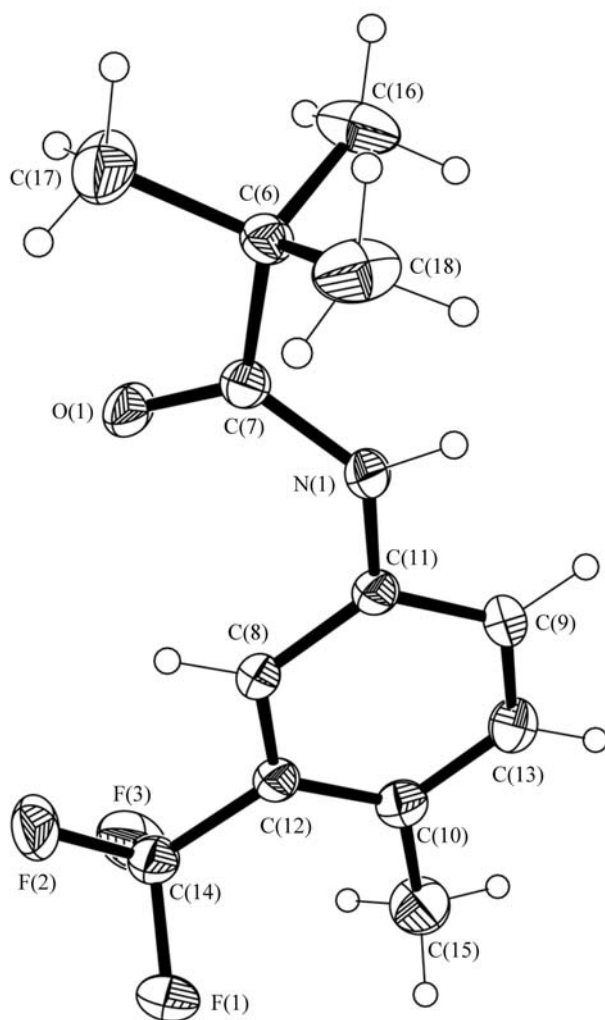

Ortep drawing of  $C_{13}H_{16}NOF_3$  with 35% probability ellipsoids, showing the atomic numbering scheme.

## 6. Crystal Structure of 3c

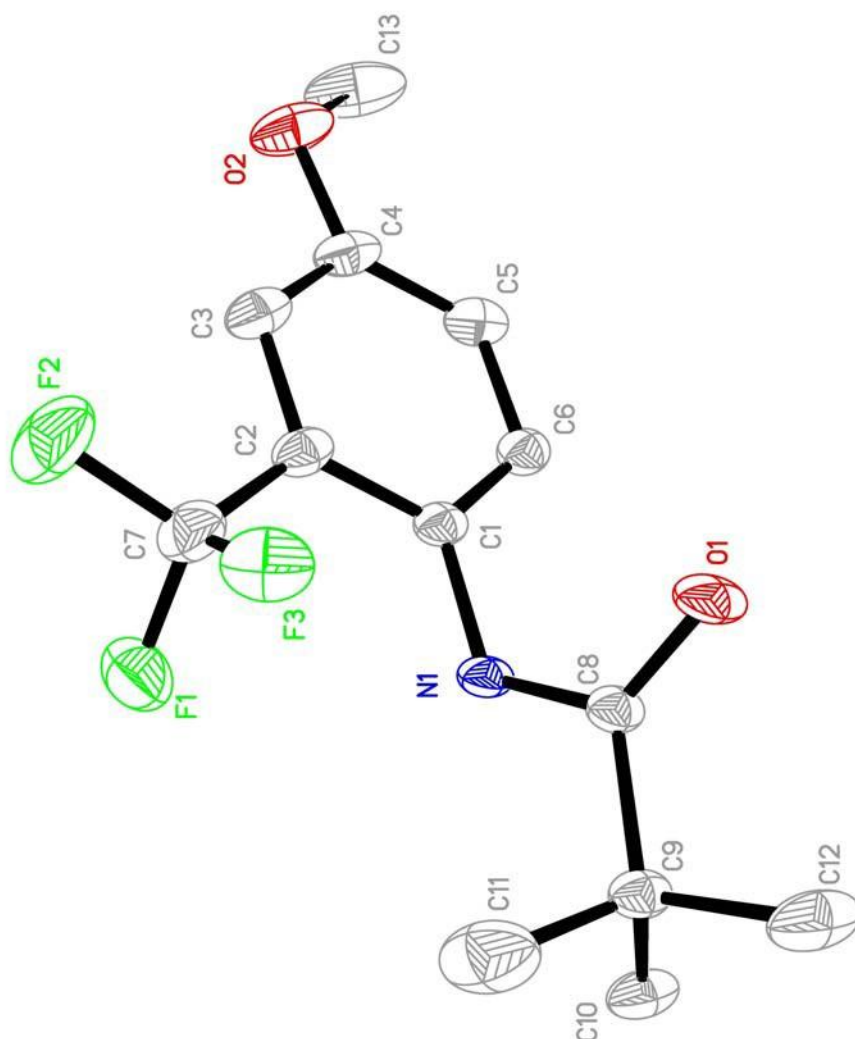

Ortep drawing of  $C_{13}H_{16}F_3NO_2$  with 30% probability ellipsoids, showing the atomic numbering scheme.

## 7. Crystal Structure of Cupric Iodobenzoate 6

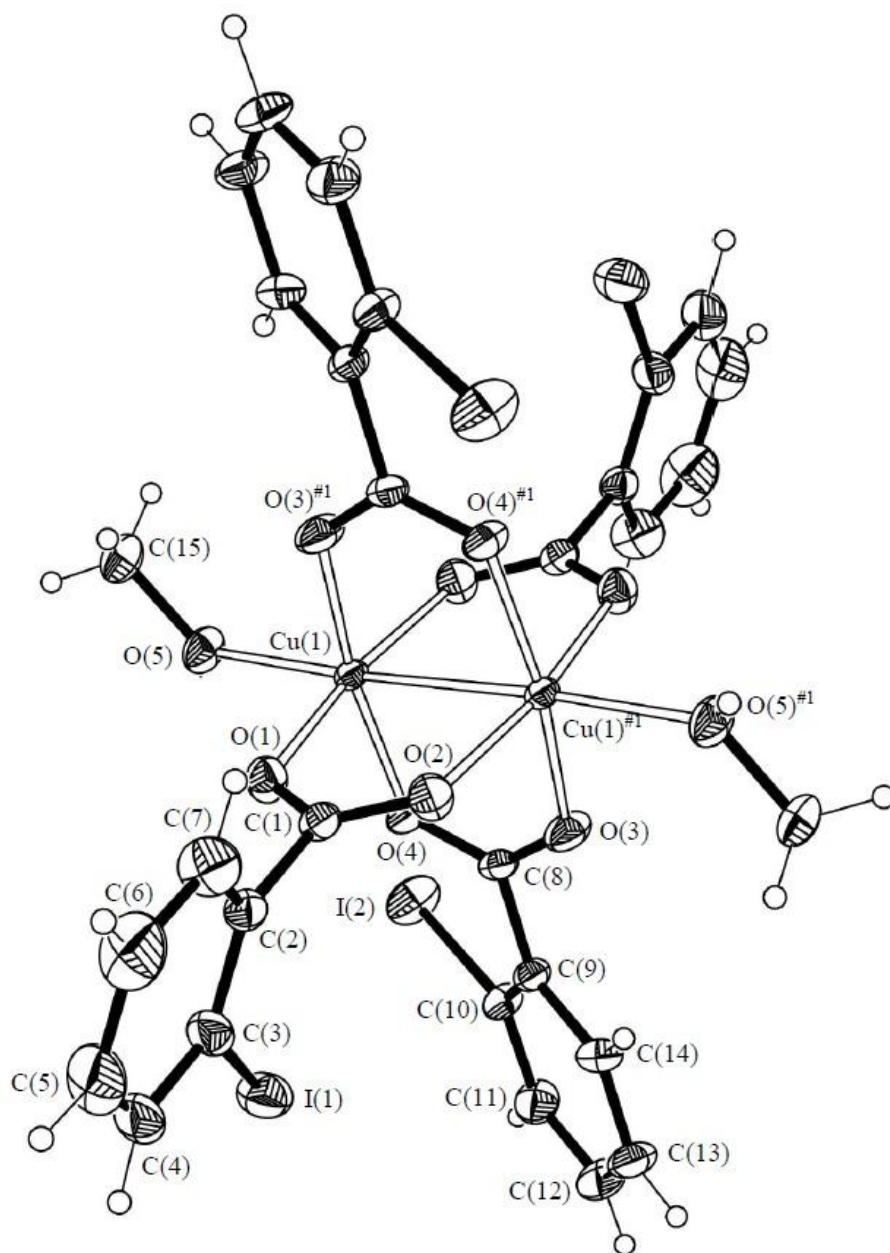

Ortep drawing of  $[\text{Cu}(\text{C}_7\text{H}_4\text{IO}_2)_2(\text{CH}_3\text{OH})]_2$  with 50% probability ellipsoids, showing the atomic numbering scheme.

## 8. Capture of Trifluoromethyl Radical by EPR

A sealed tube was charged with the mixture of N-Phenylpivalamide **1a** (0.1 mmol), Togni reagent **2** (0.2 mmol, 63.2 mg), CuCl (0.02 mmol, 2 mg), PBN (4.7 mg), then *t*-BuOH (1 mL) was added under nitrogen atmosphere, the reaction was proceeded under 40 °C, and 5 minutes later, the reaction was detected by EPR.

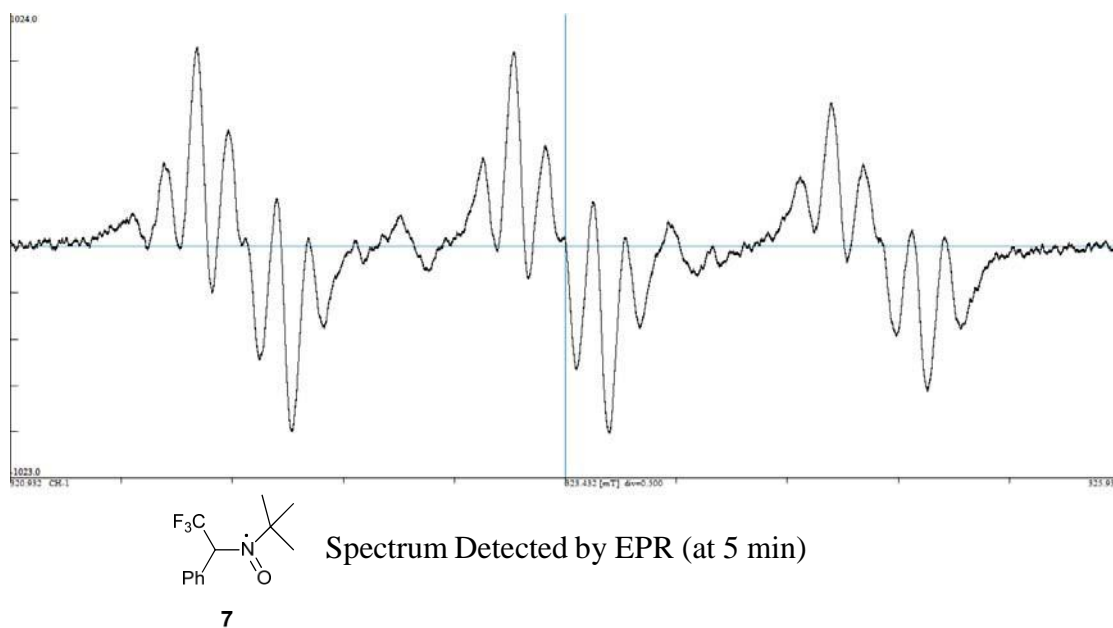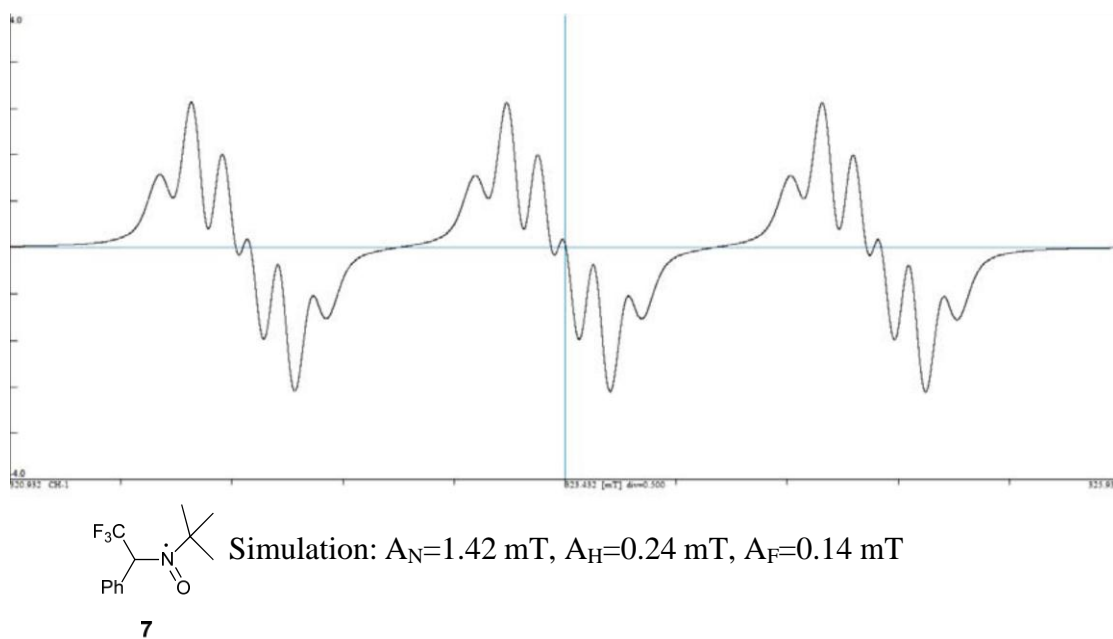

The experimental results are consistent with the simulation.

9. Copies of  $^1\text{H}$ ,  $^{13}\text{C}$  and  $^{19}\text{F}$  NMR Spectra

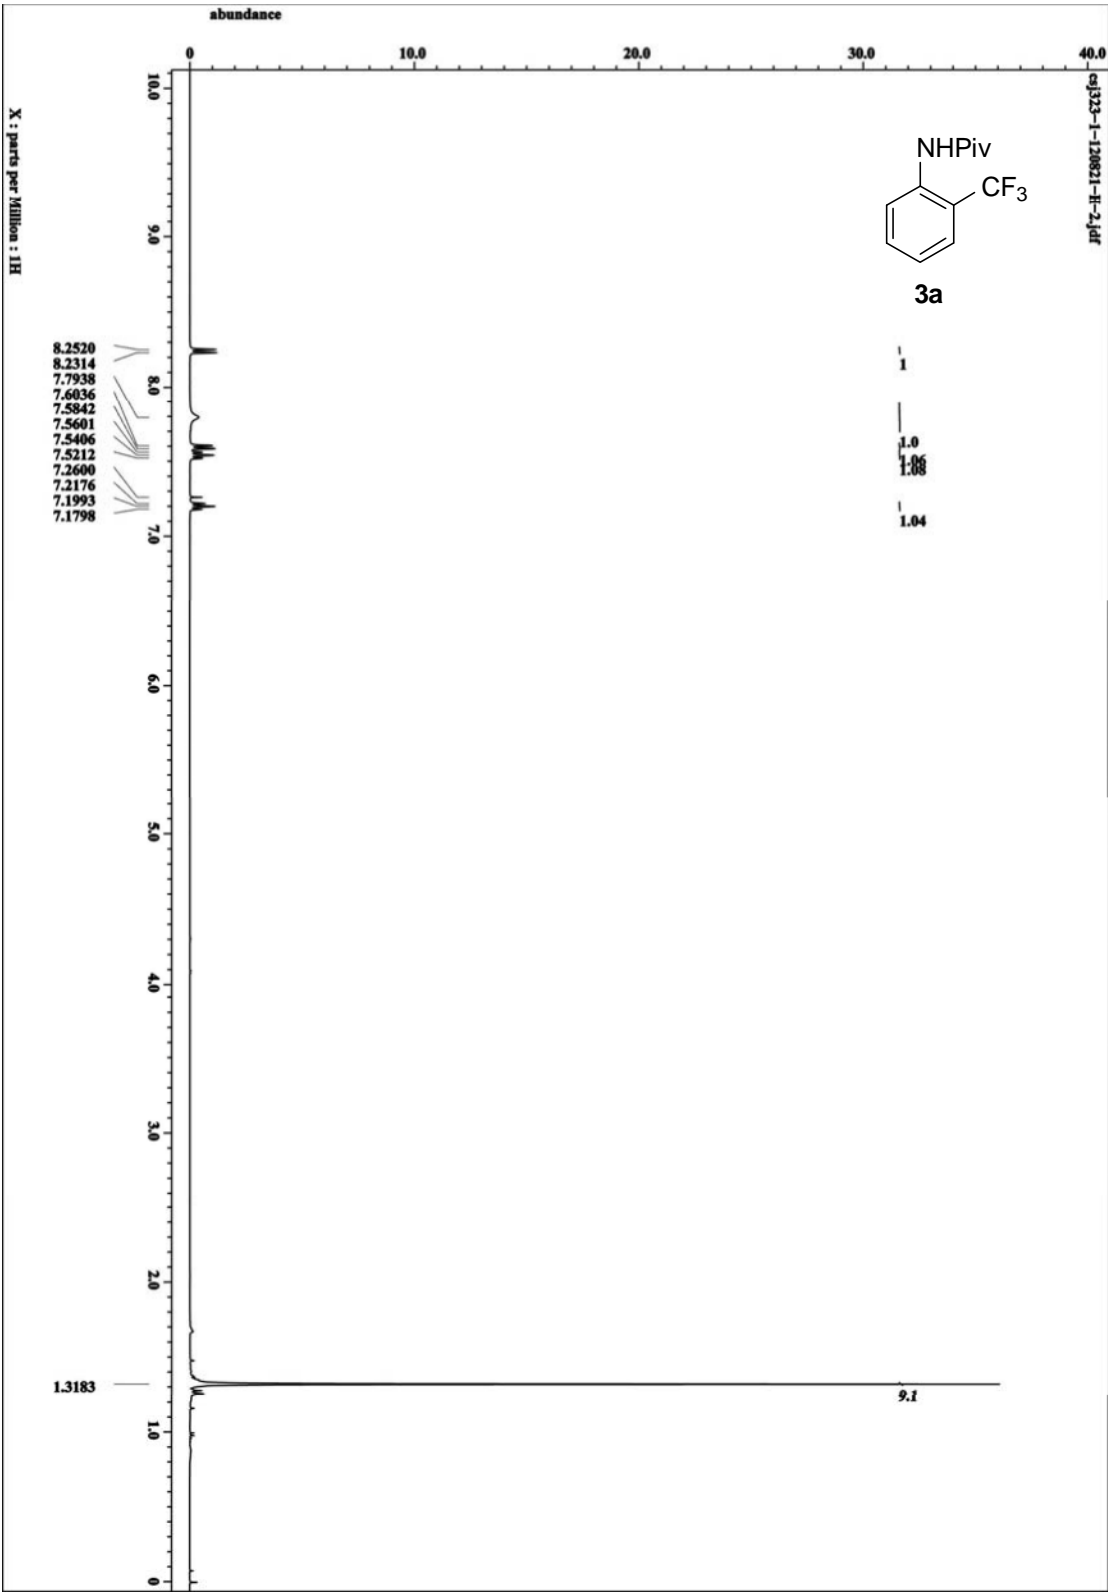

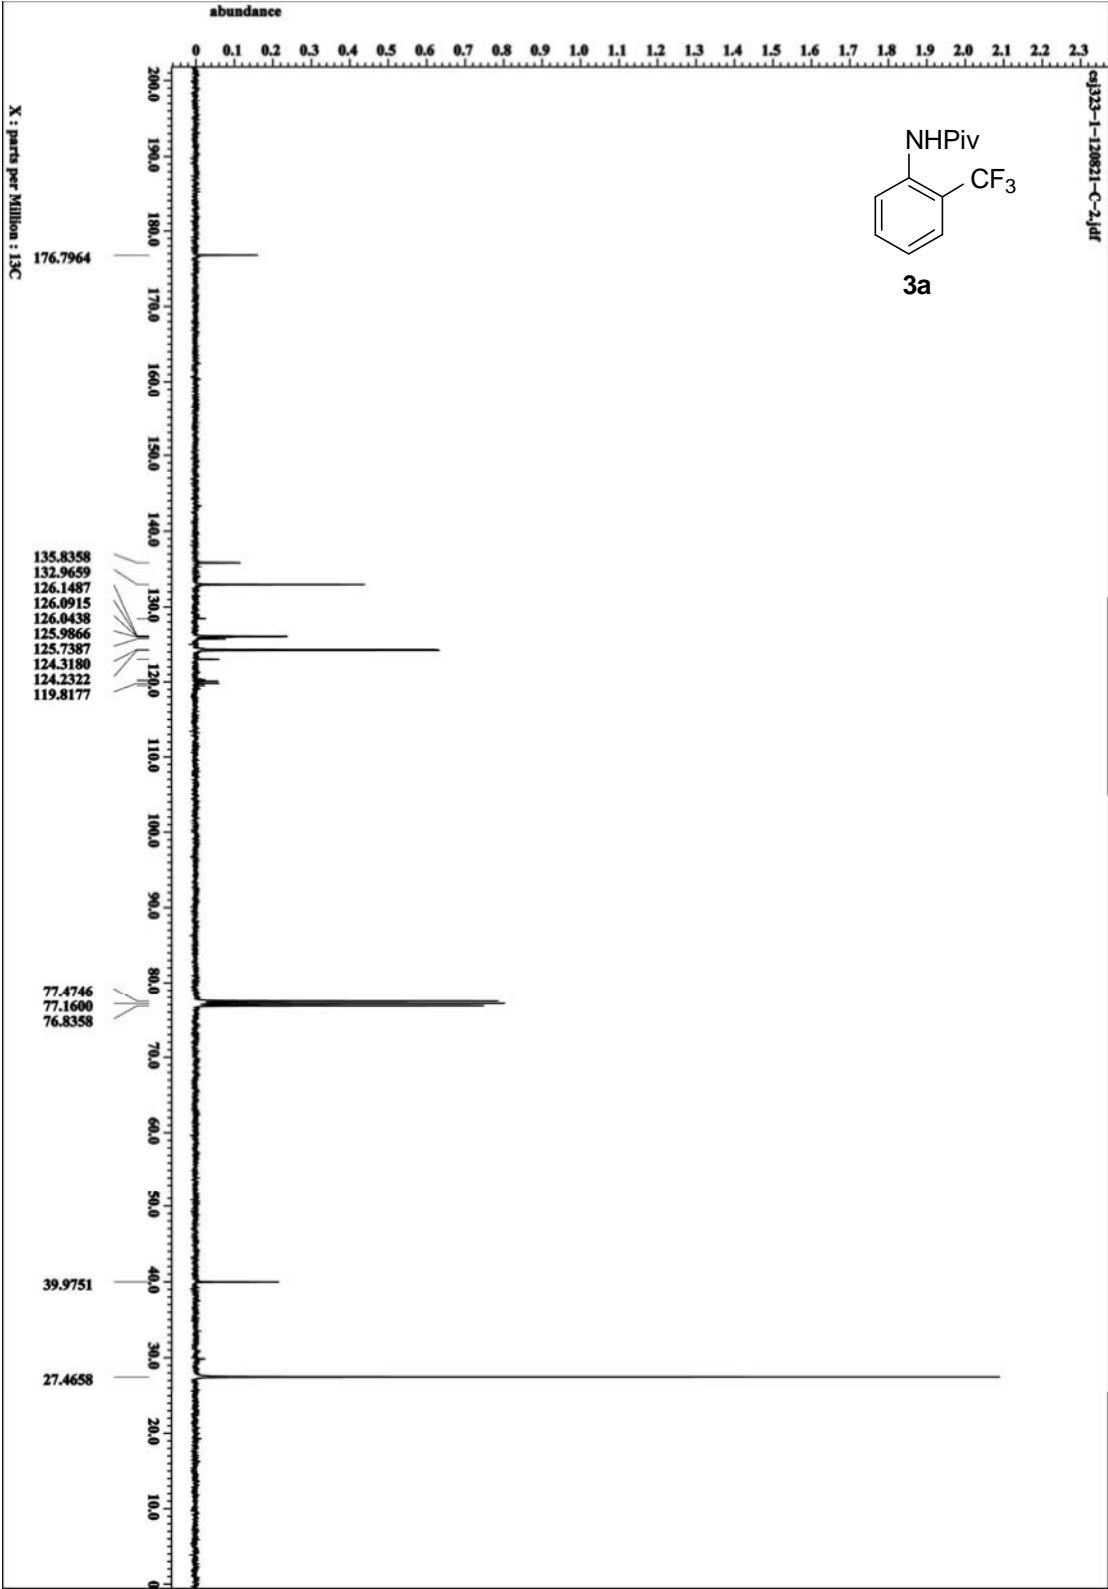

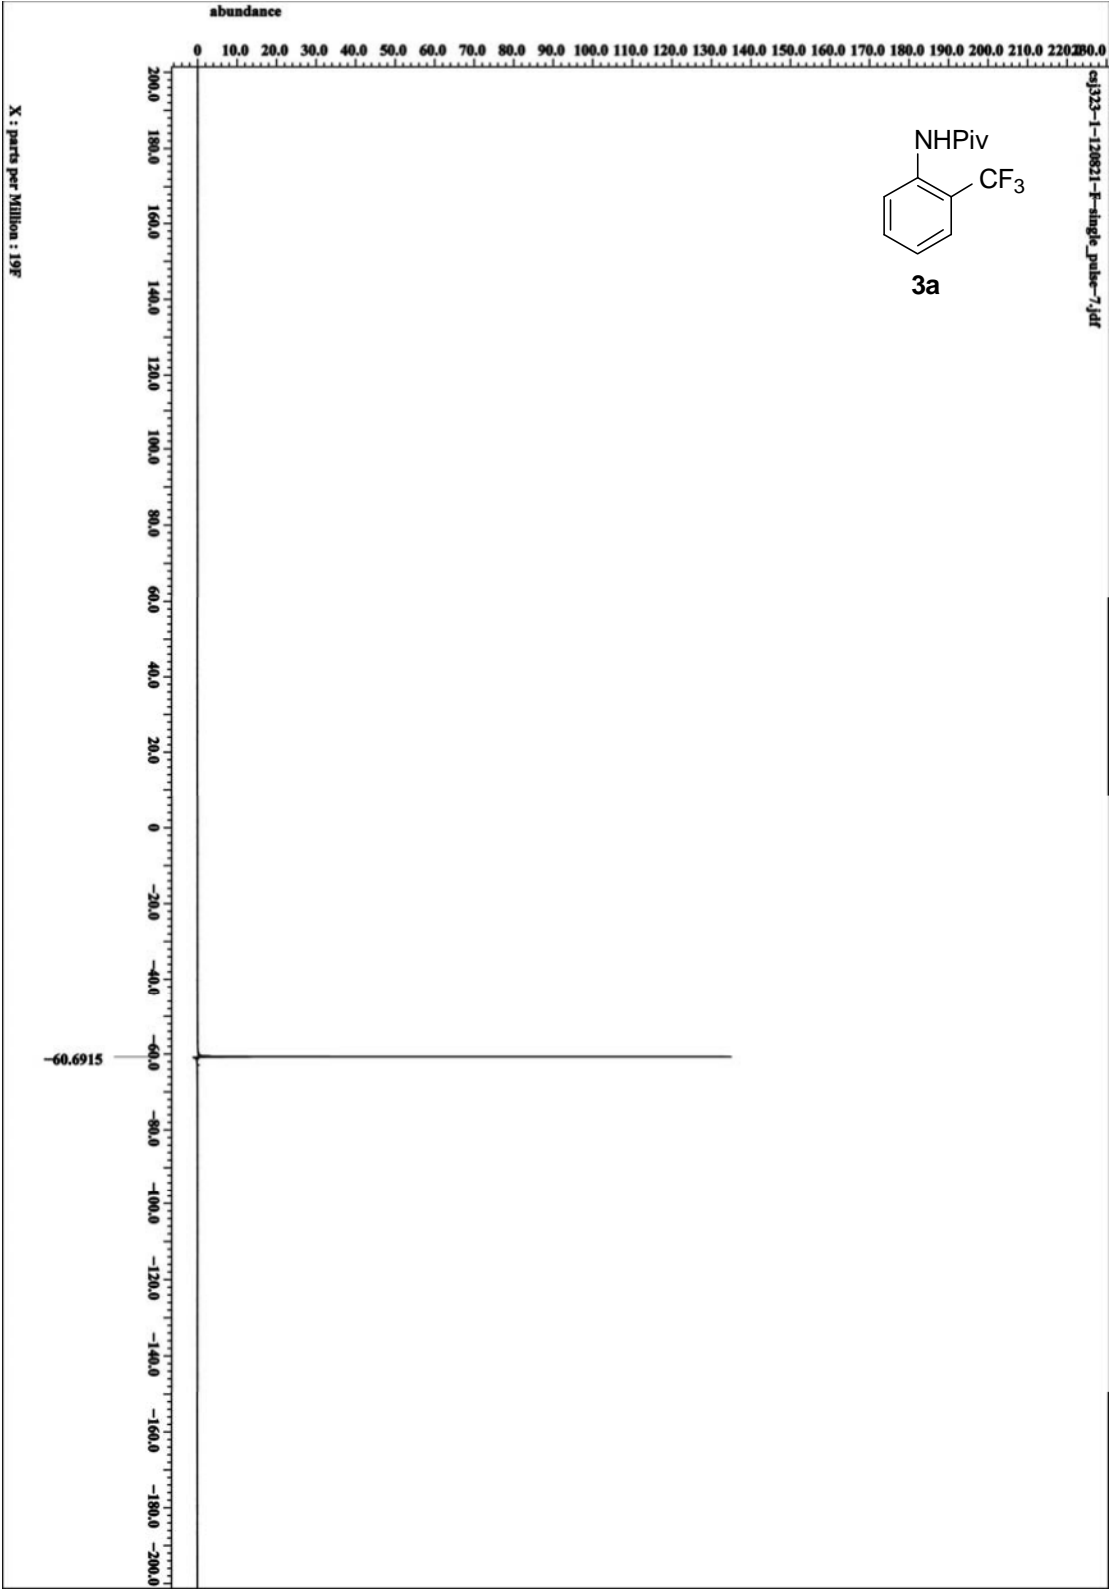

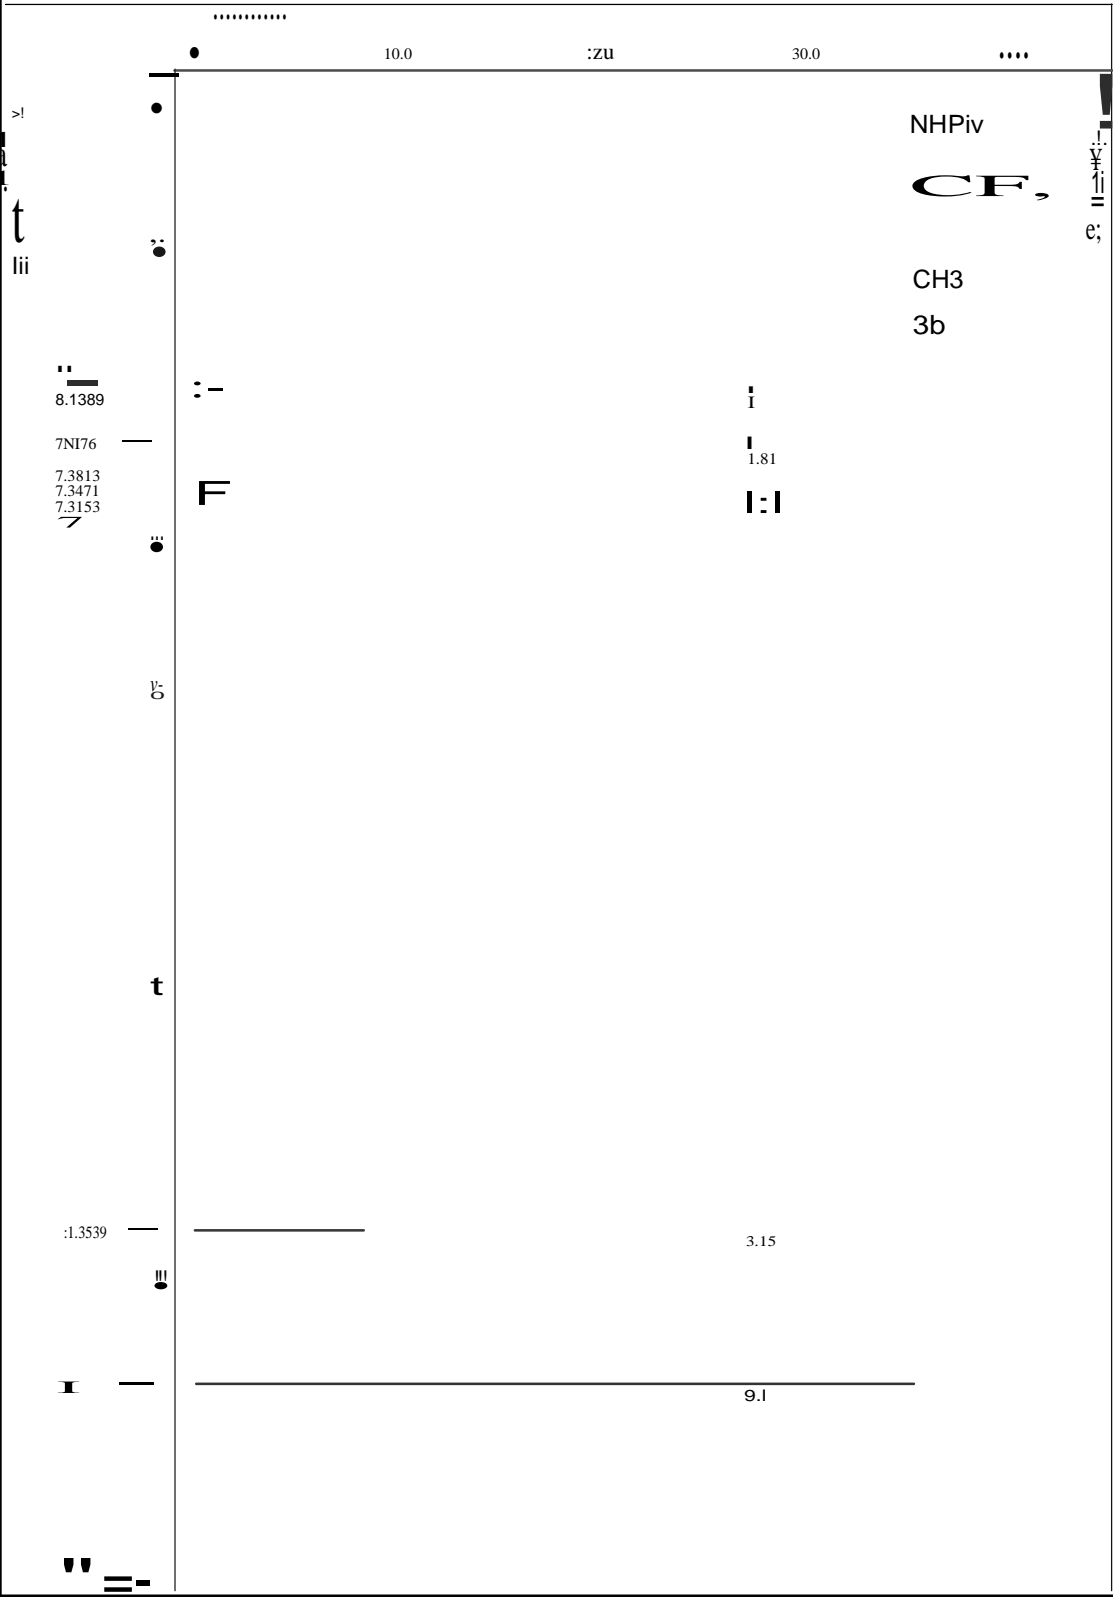

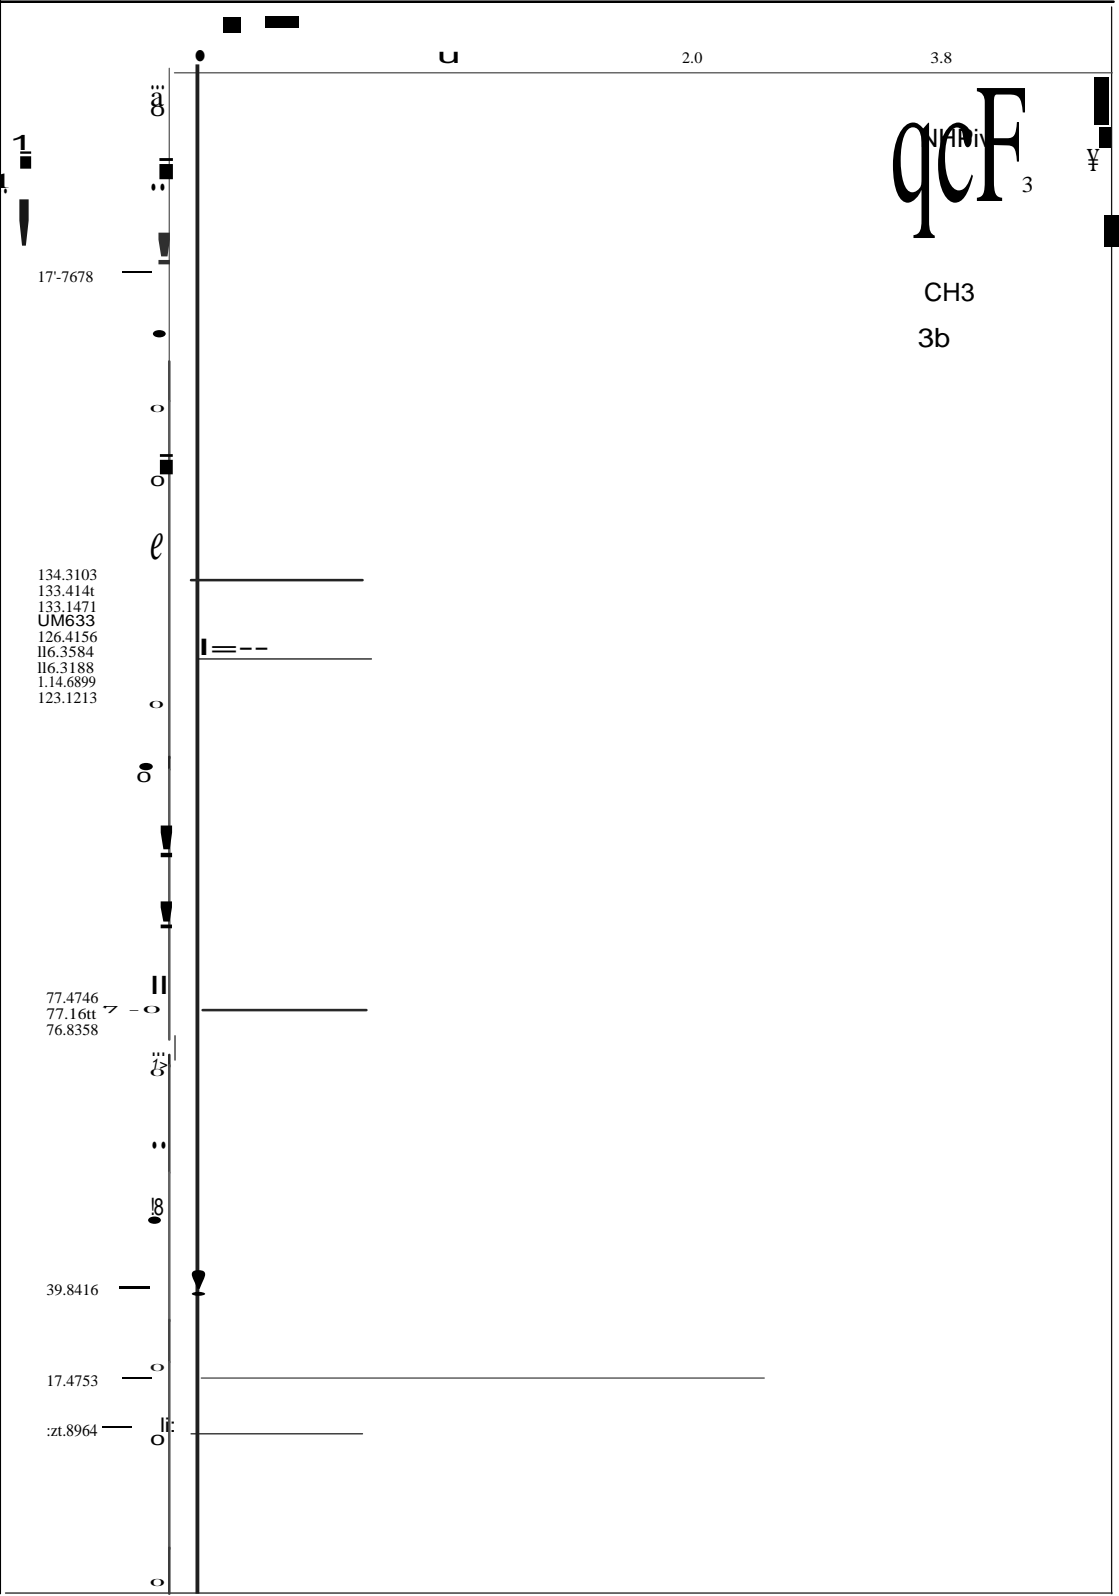

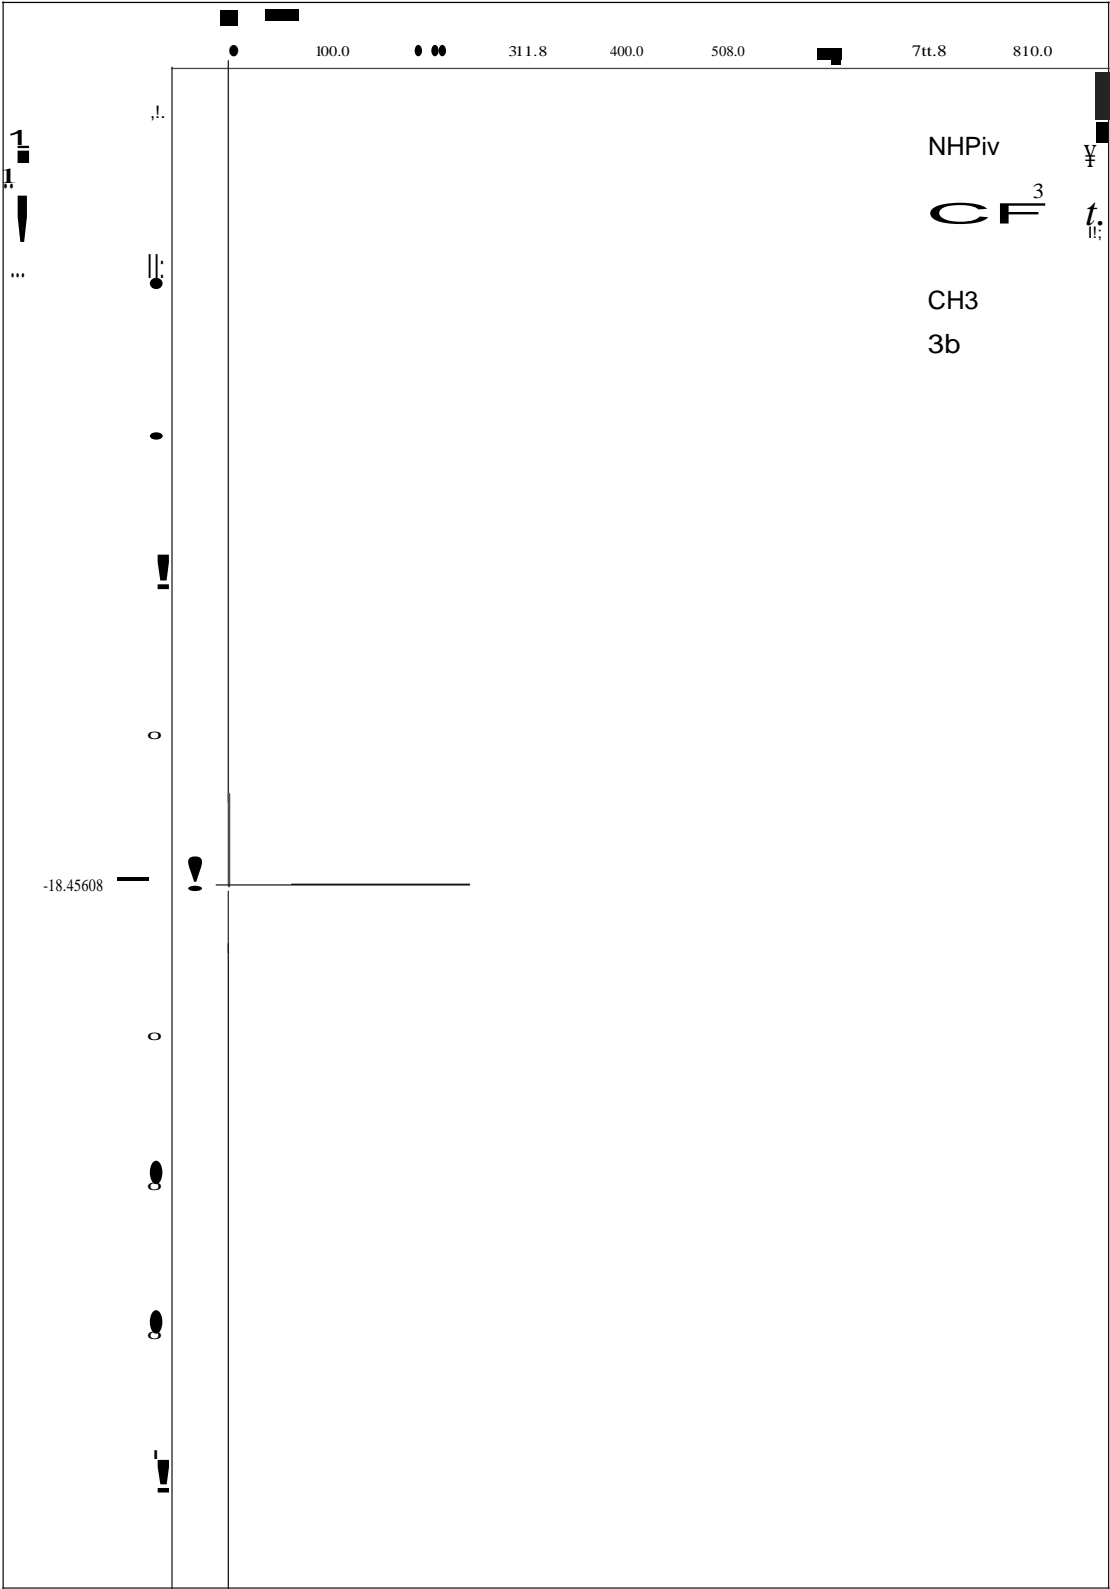

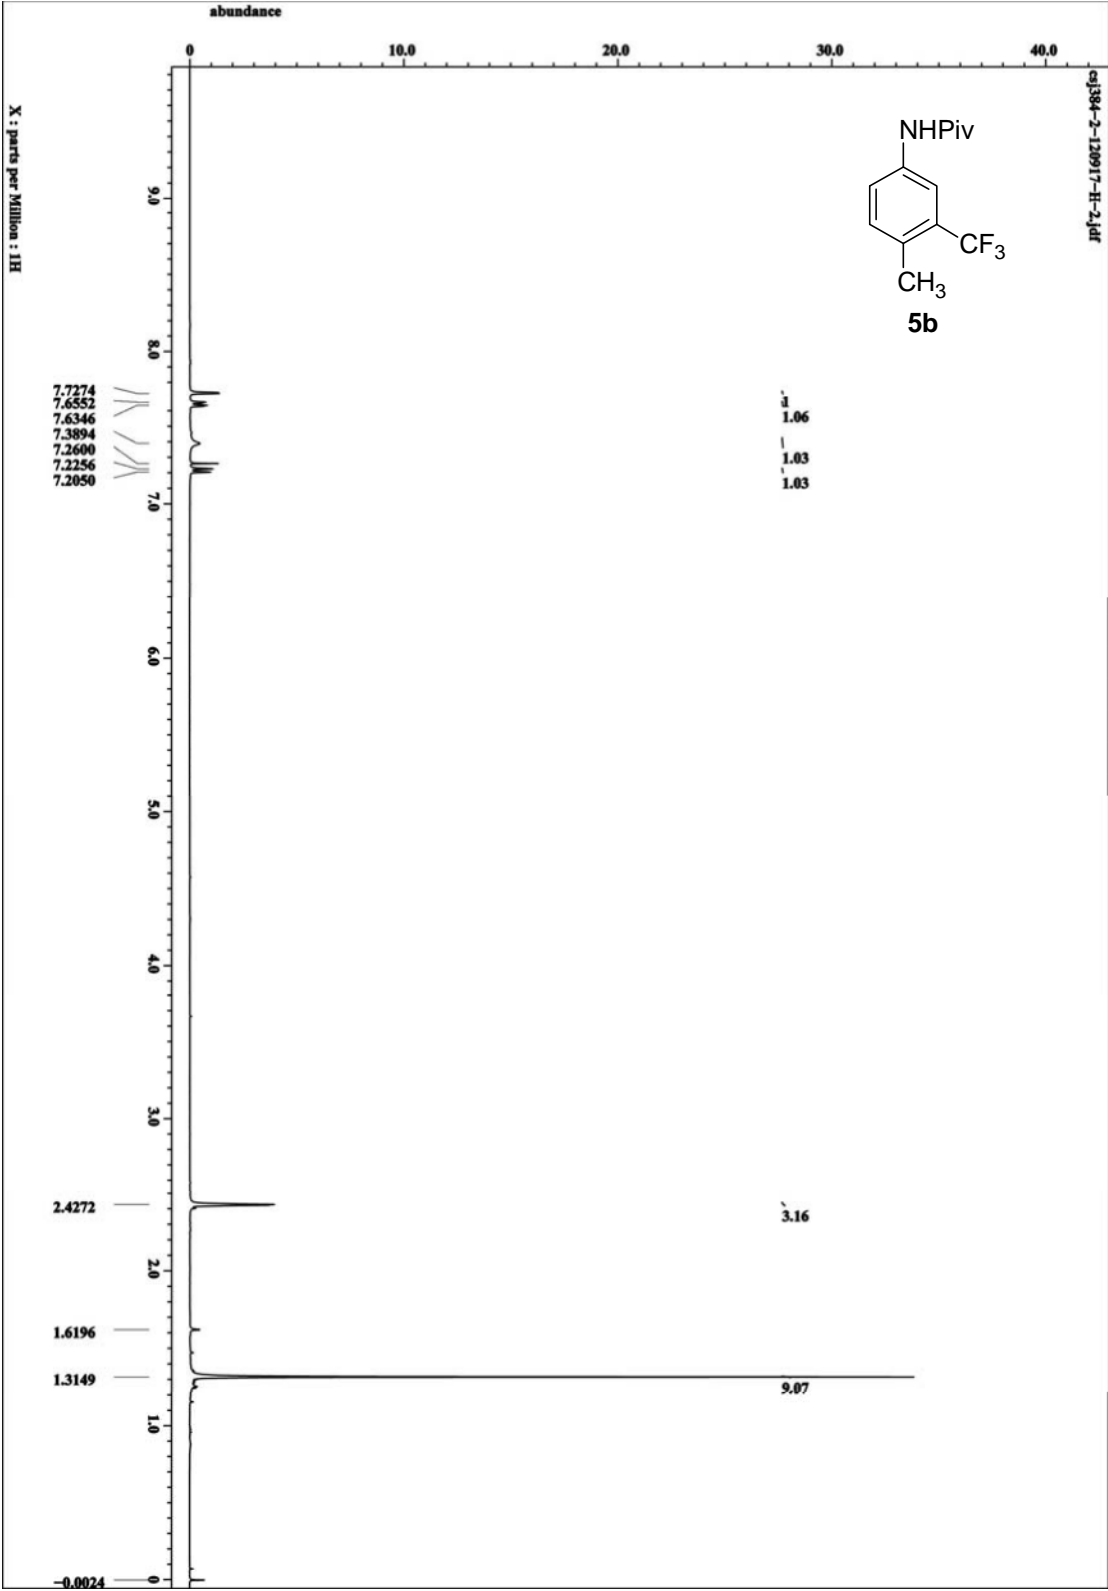

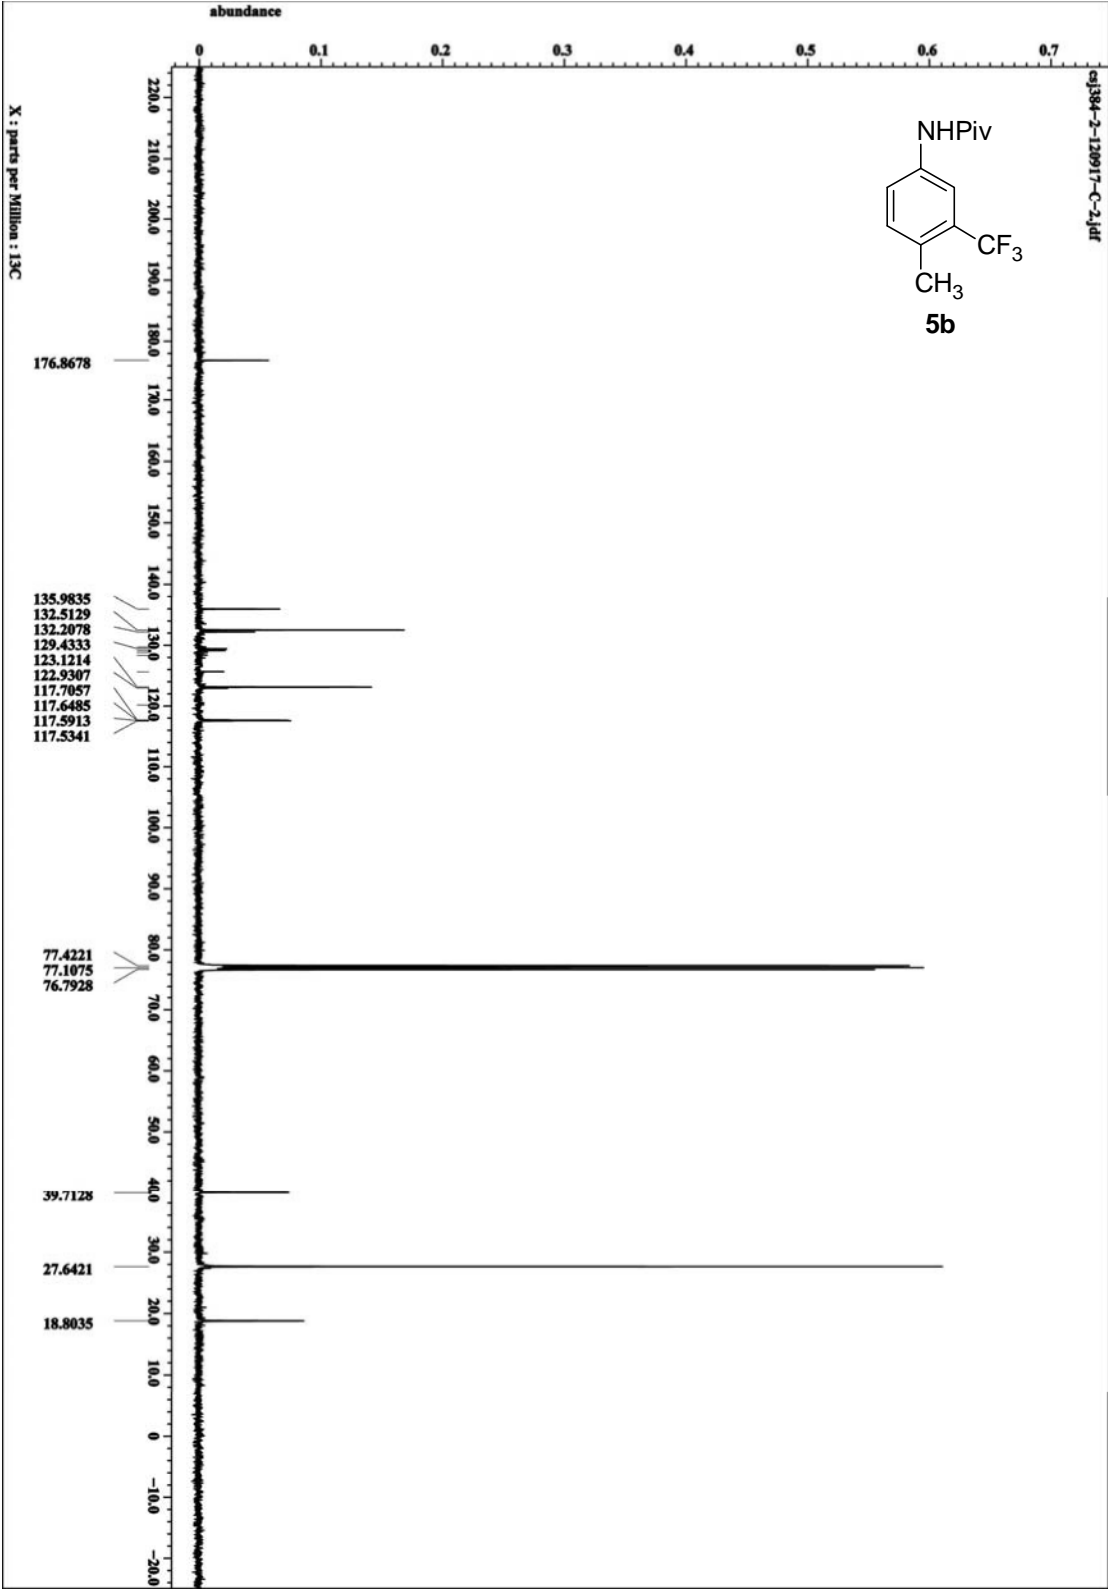

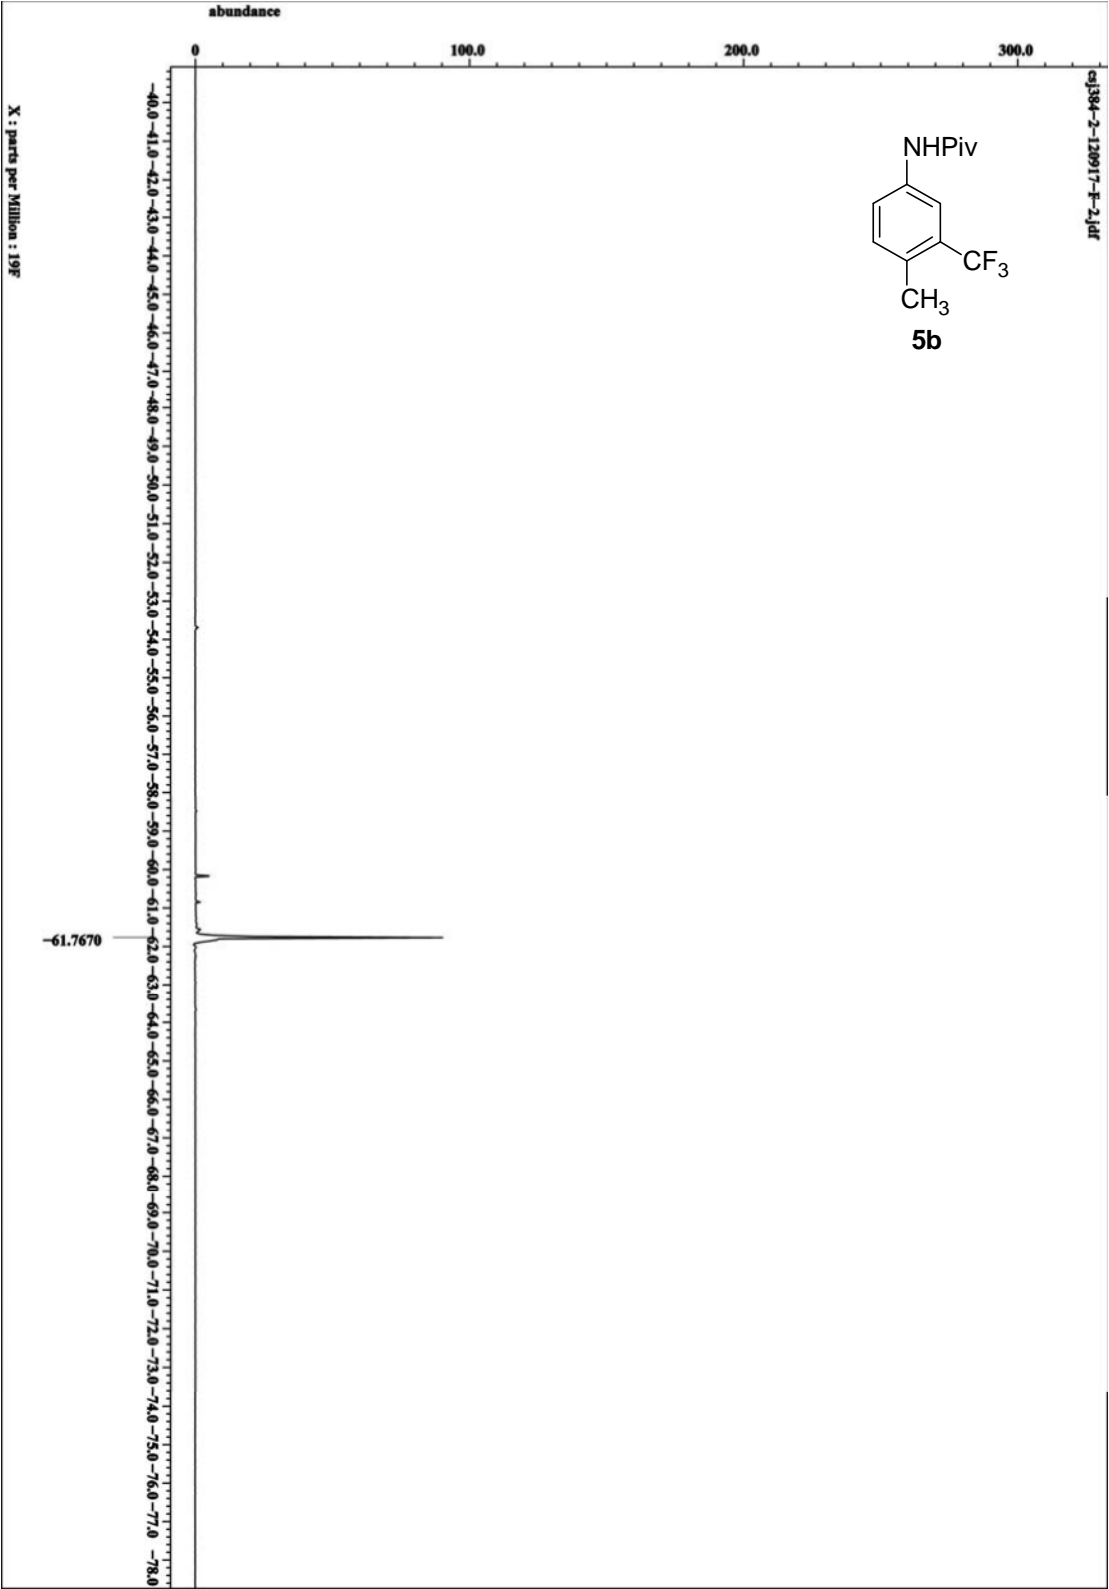

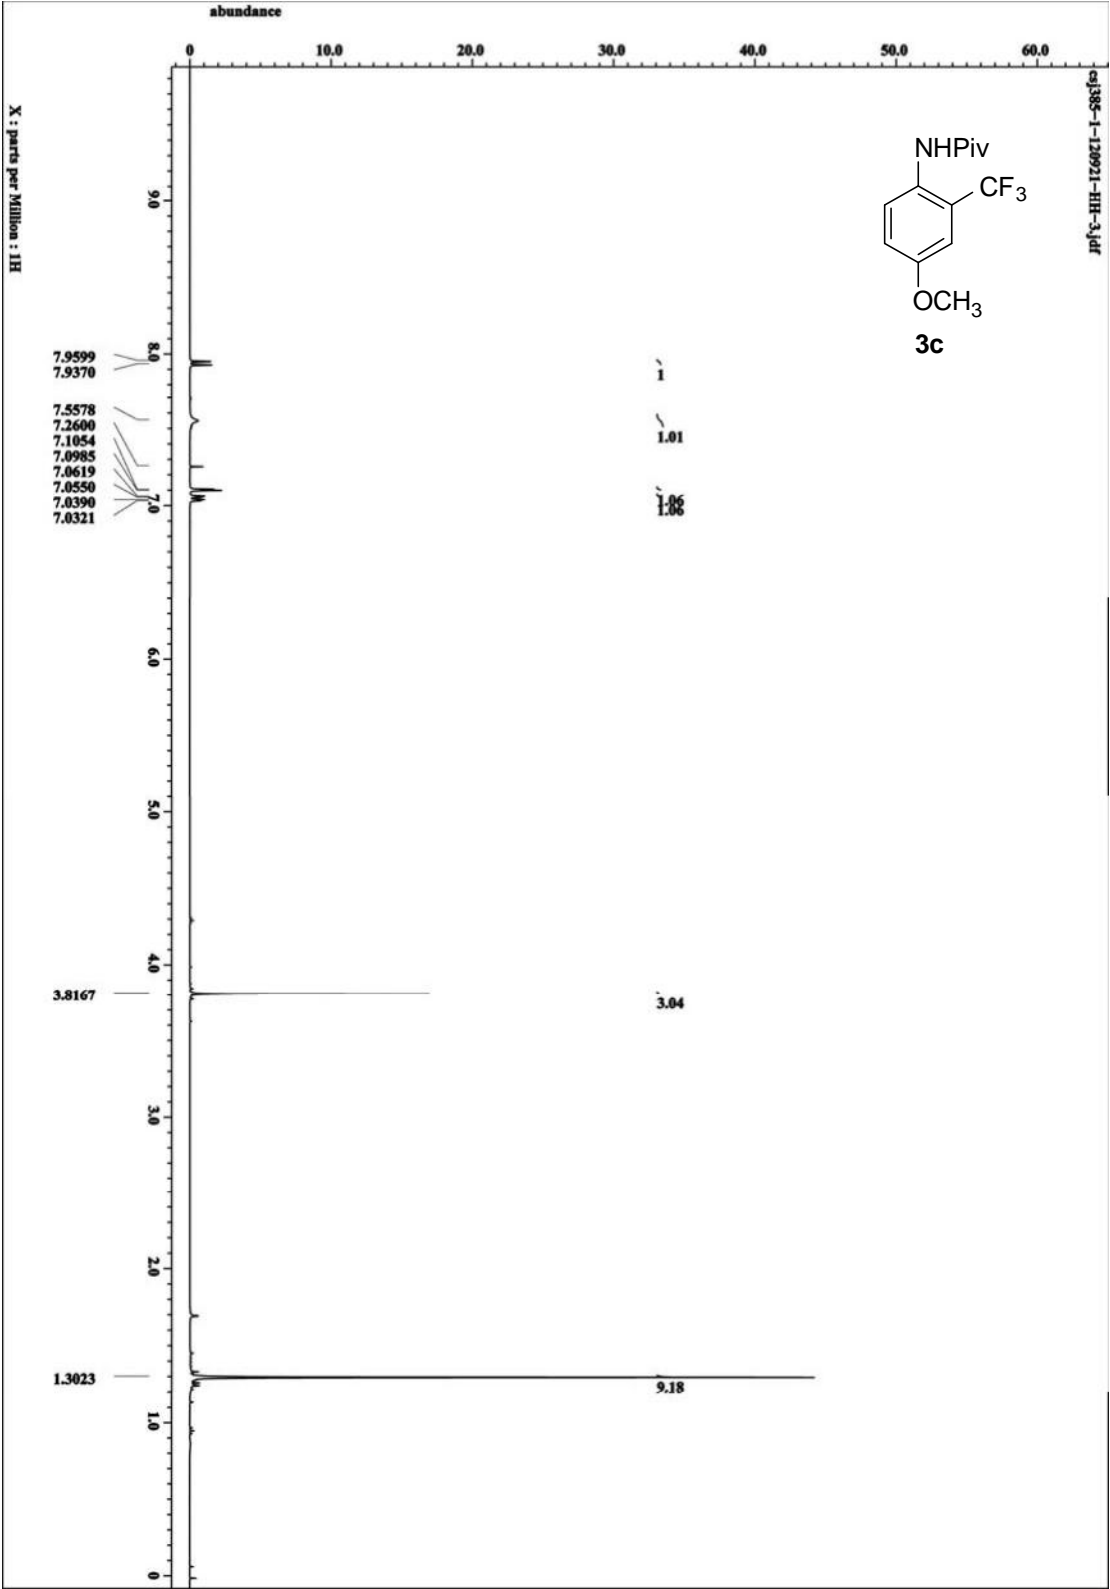

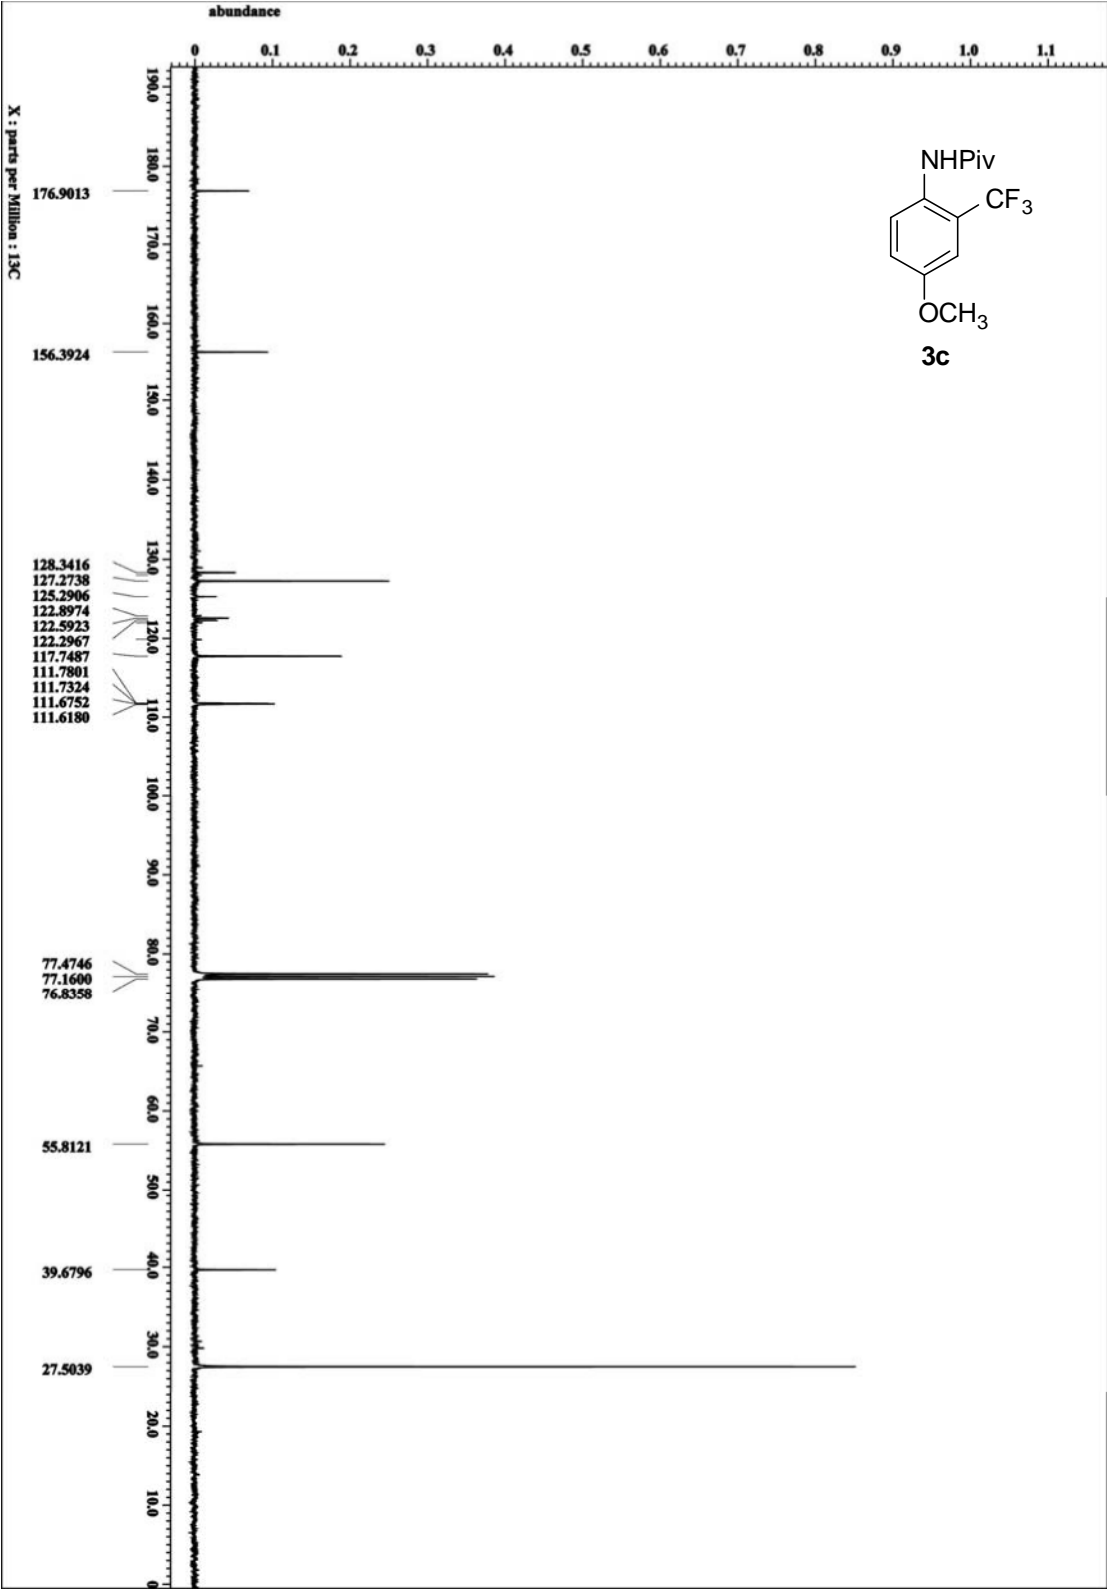

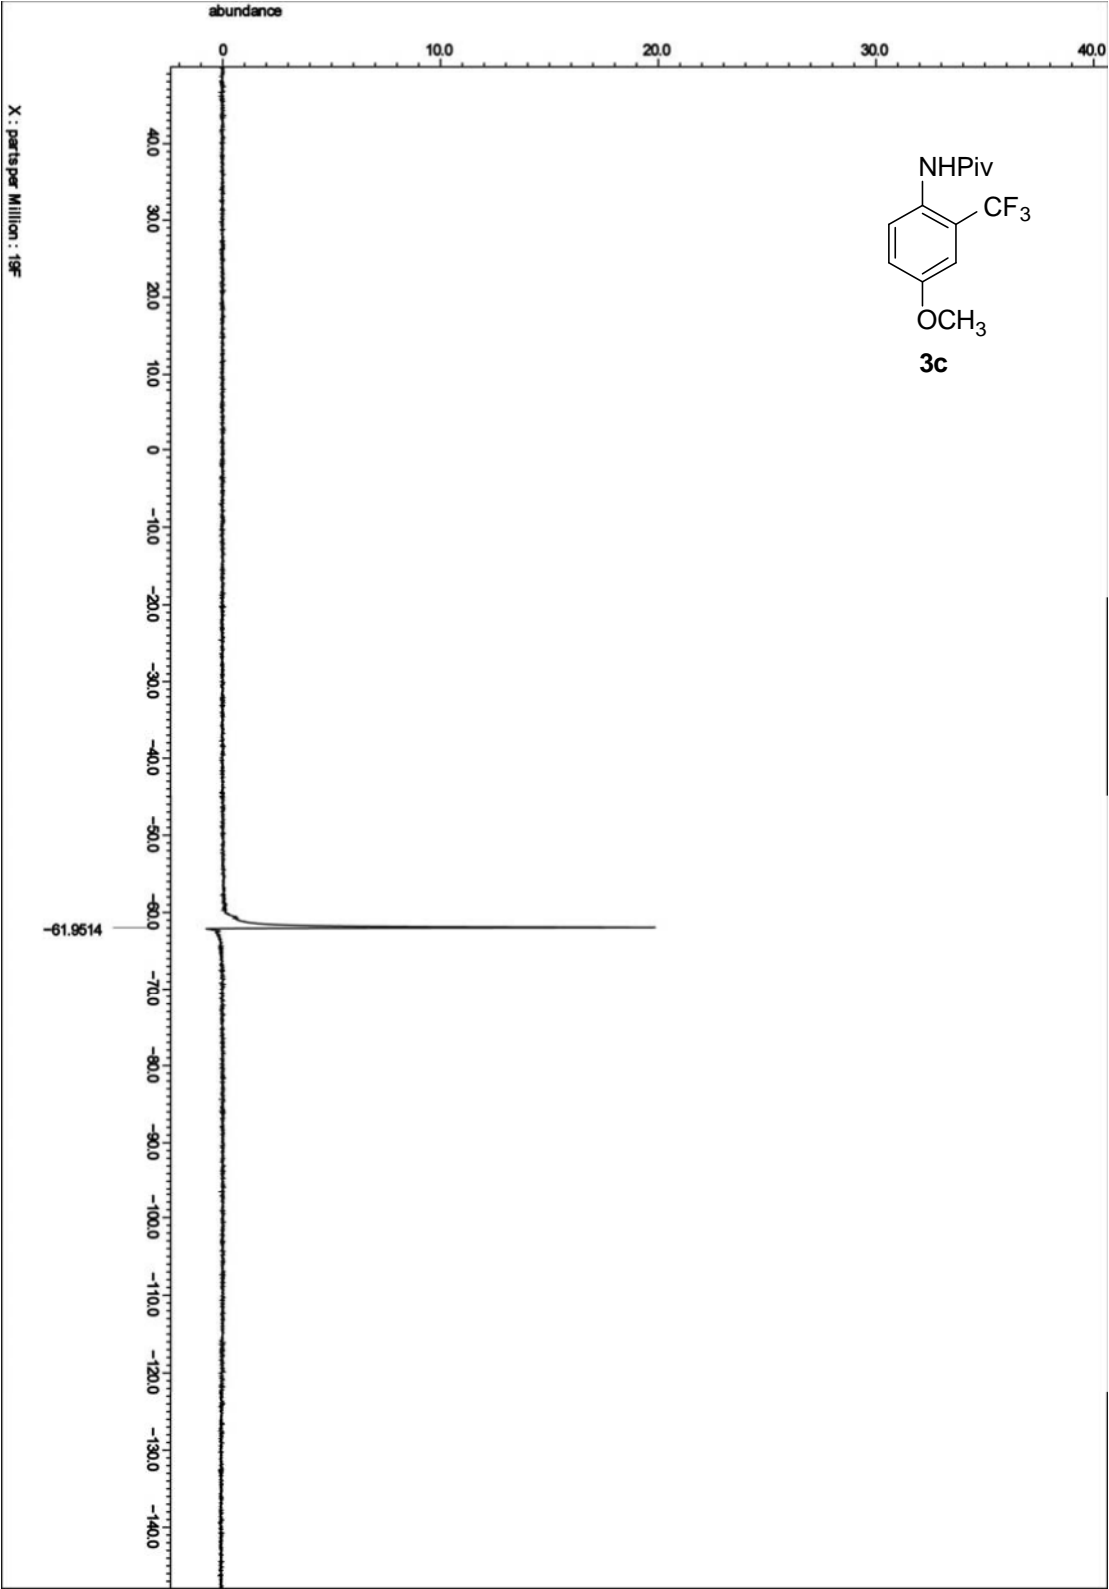

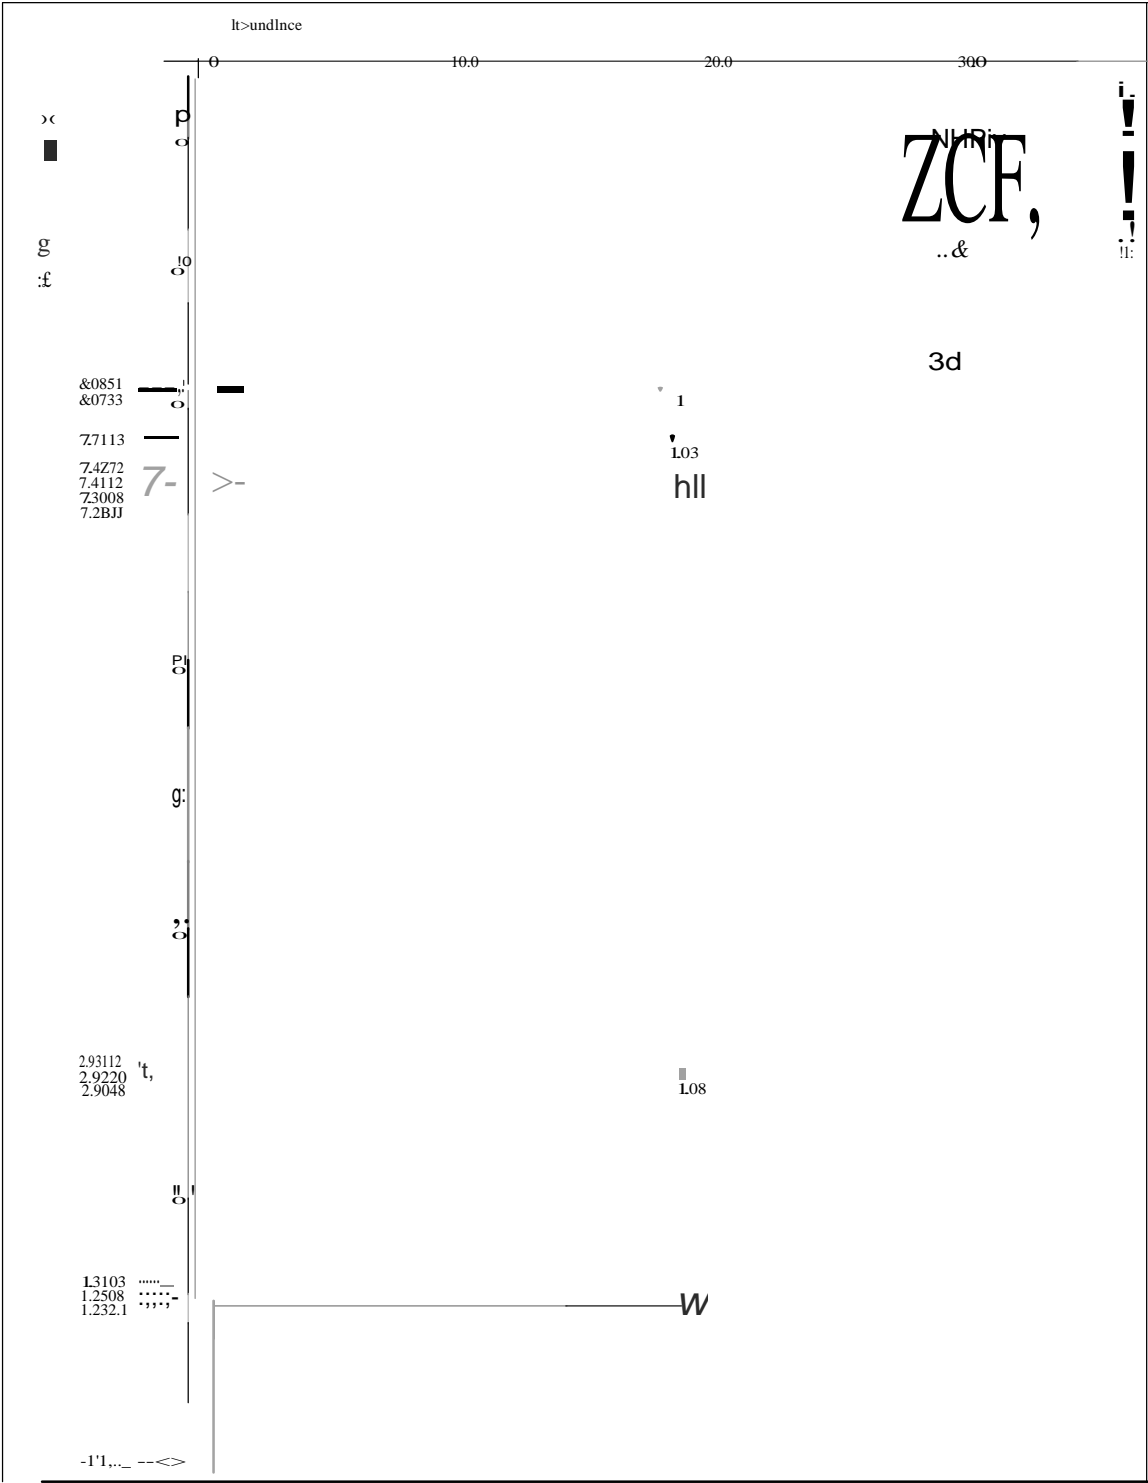

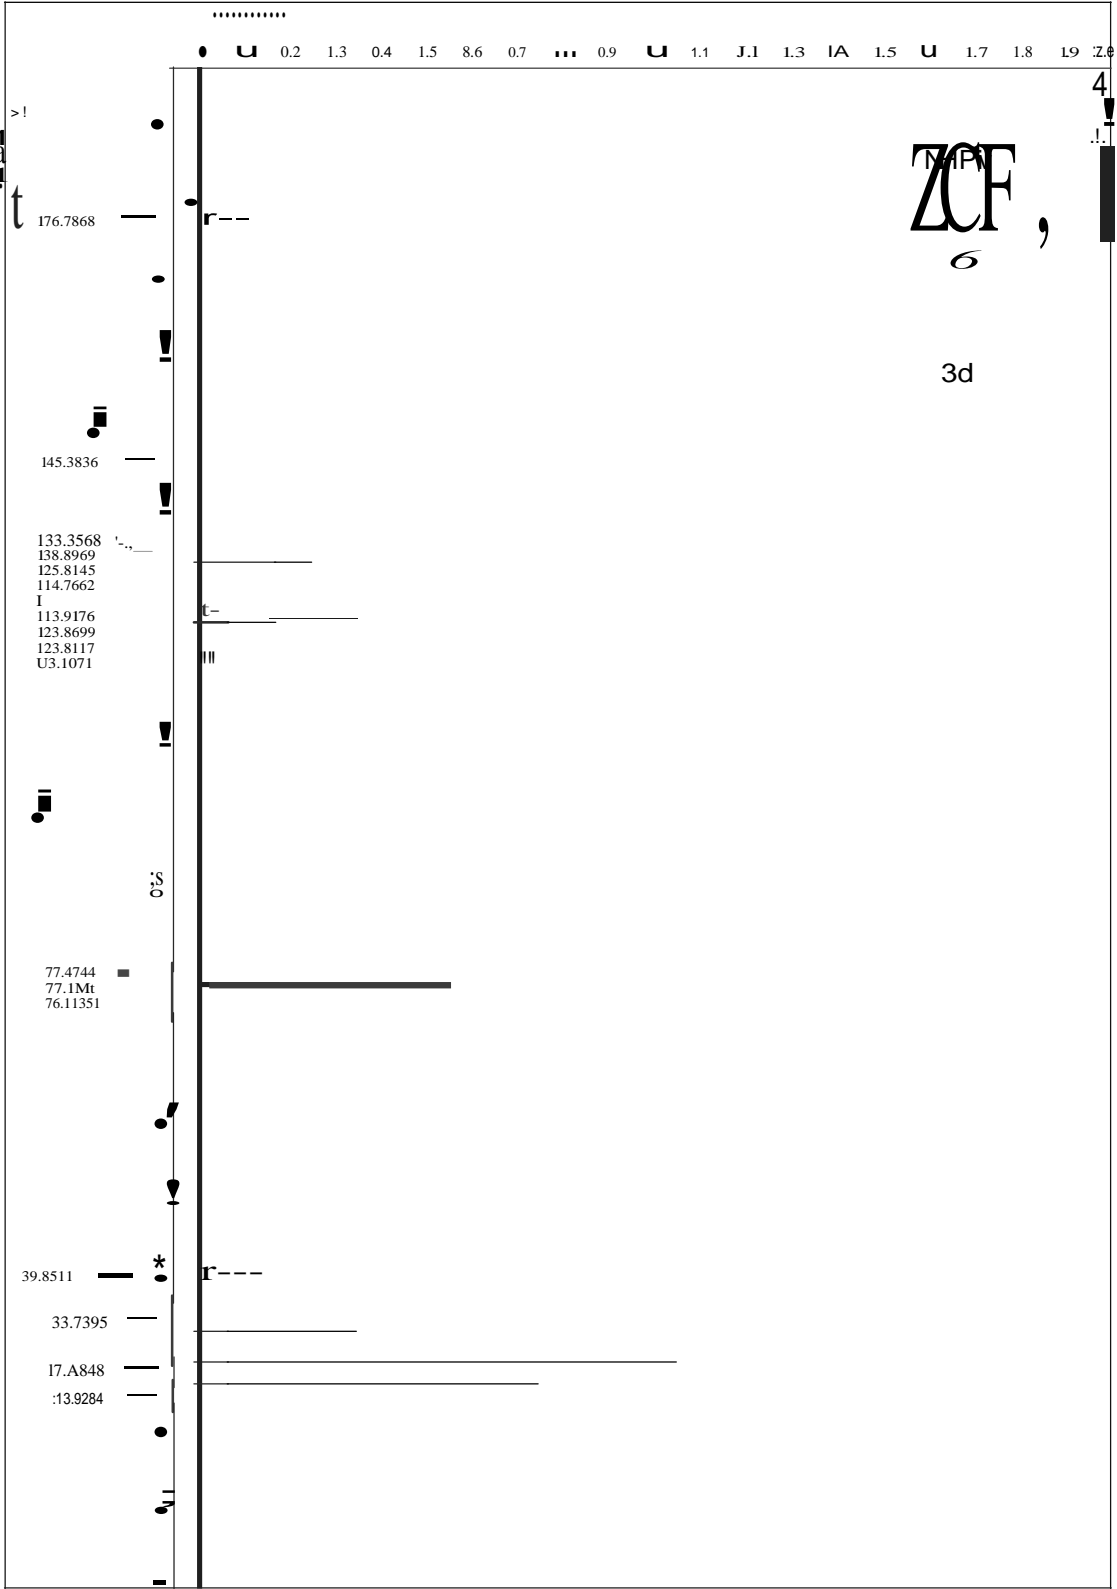

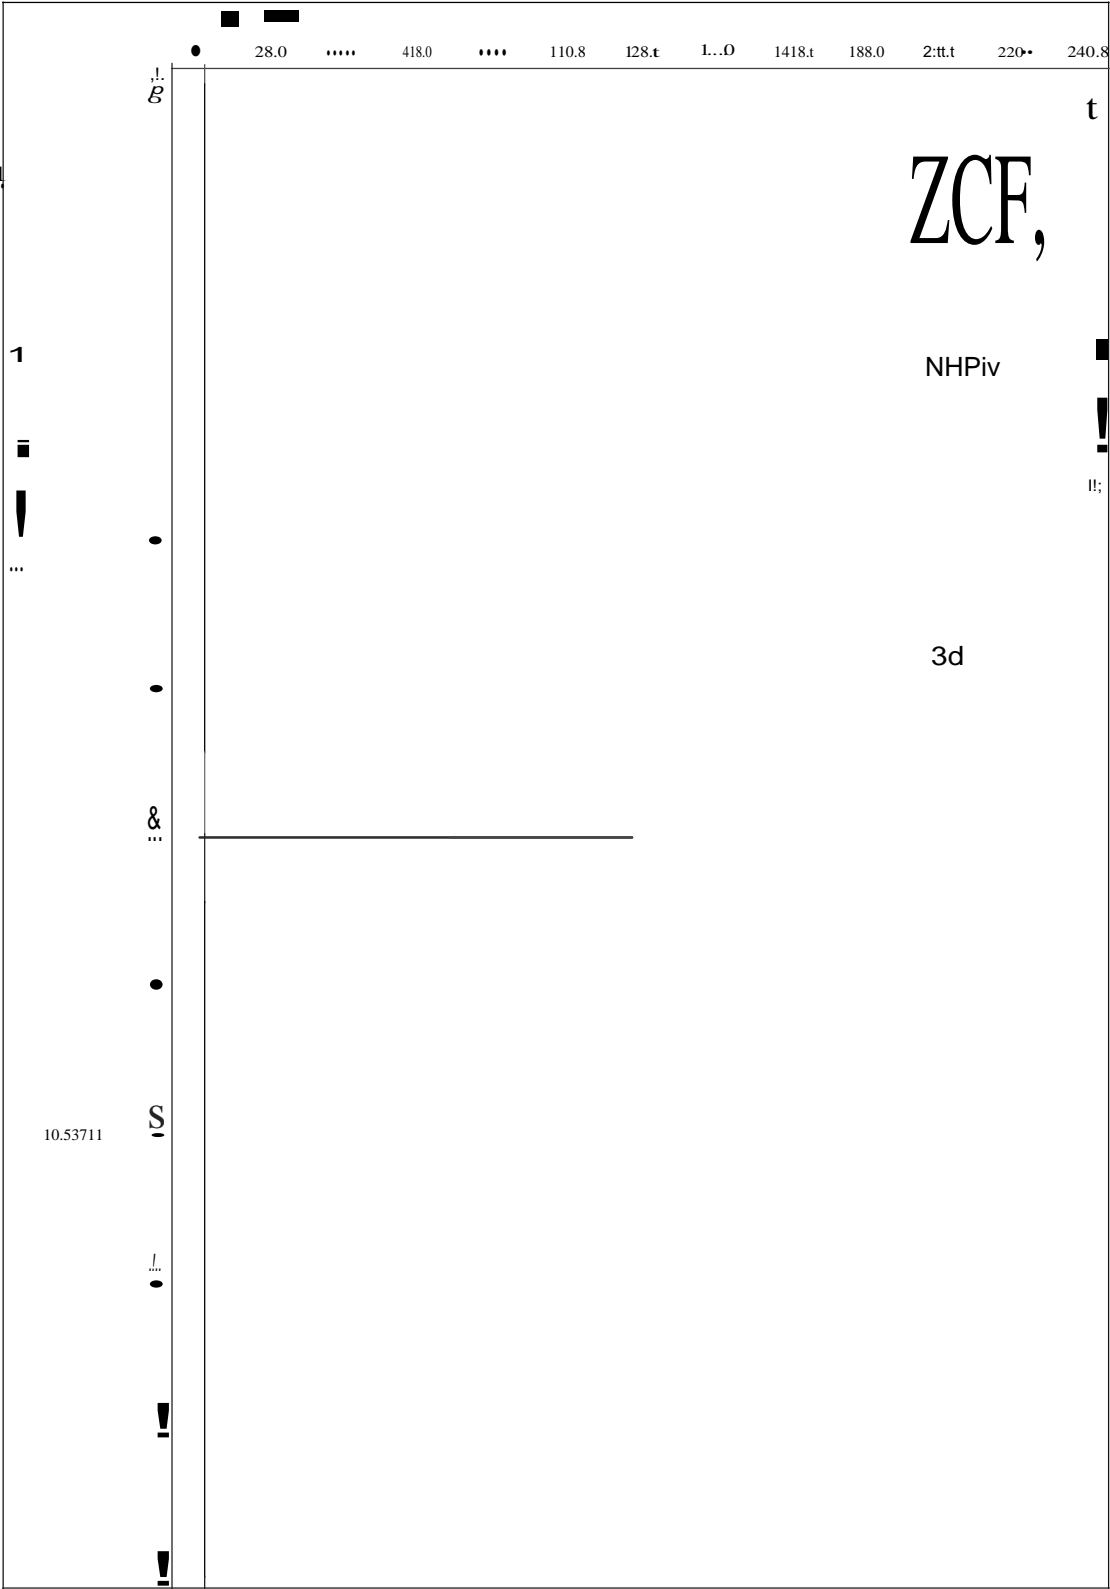

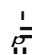

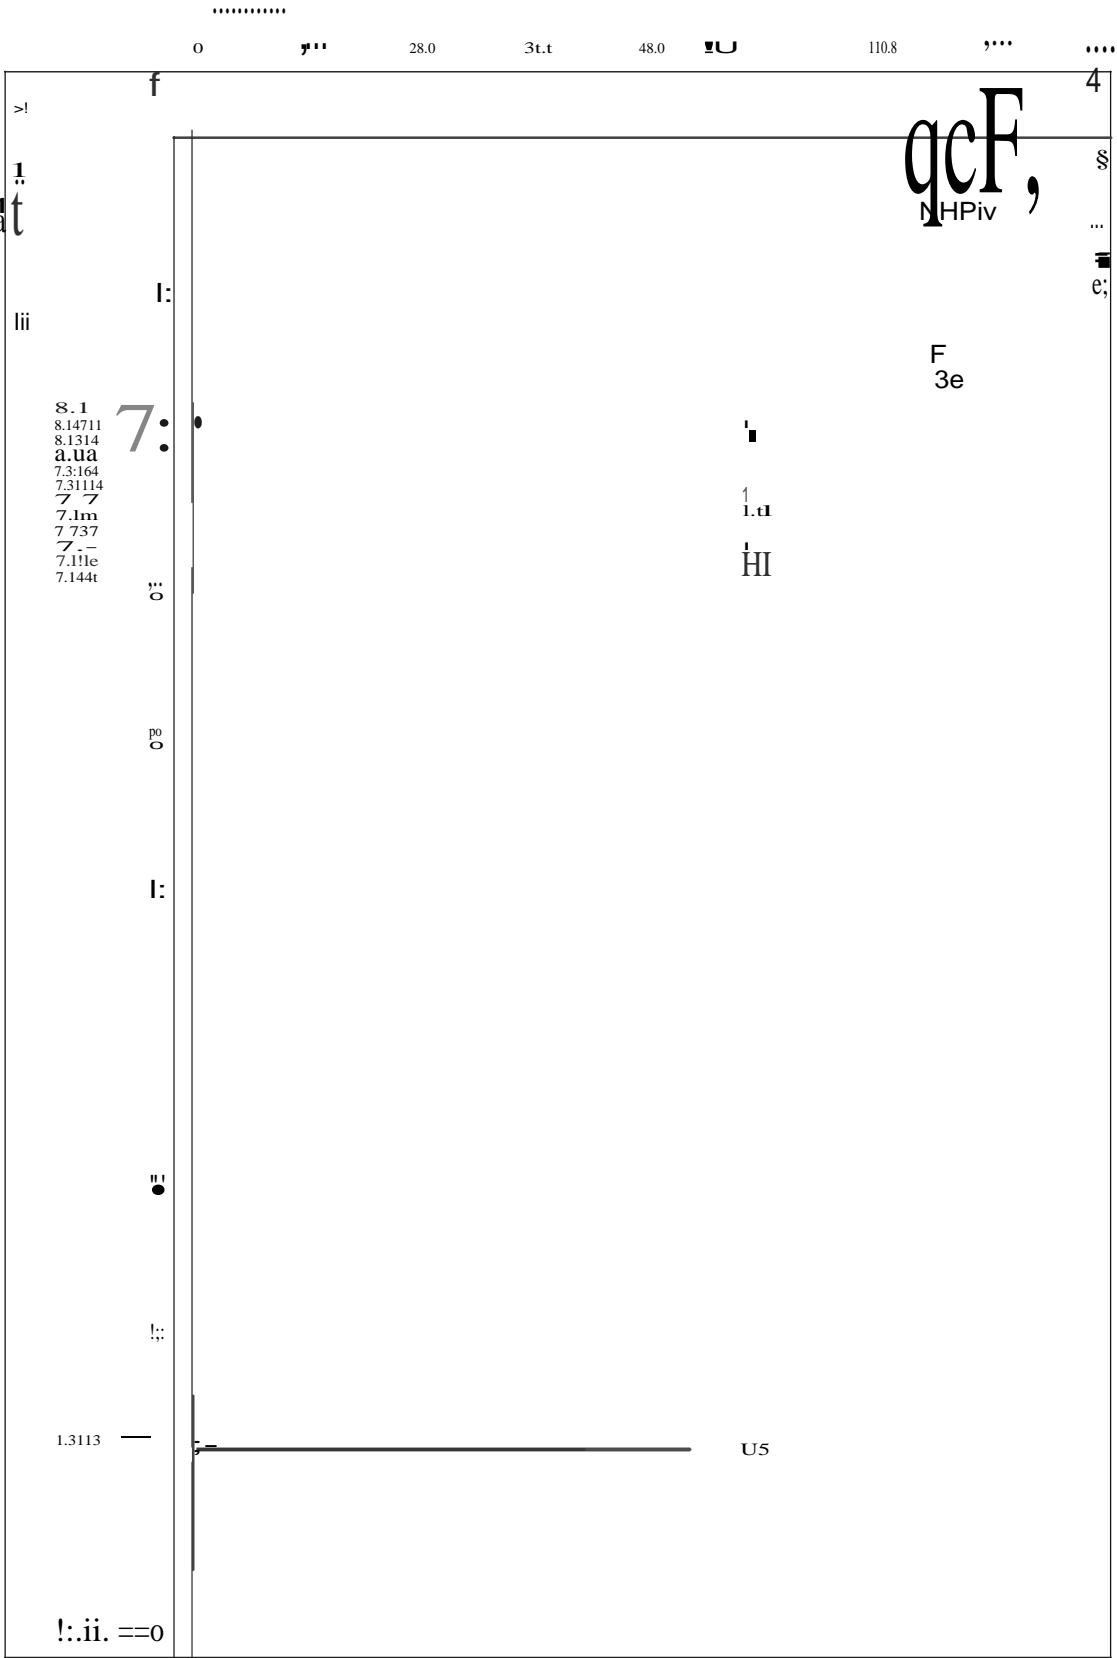

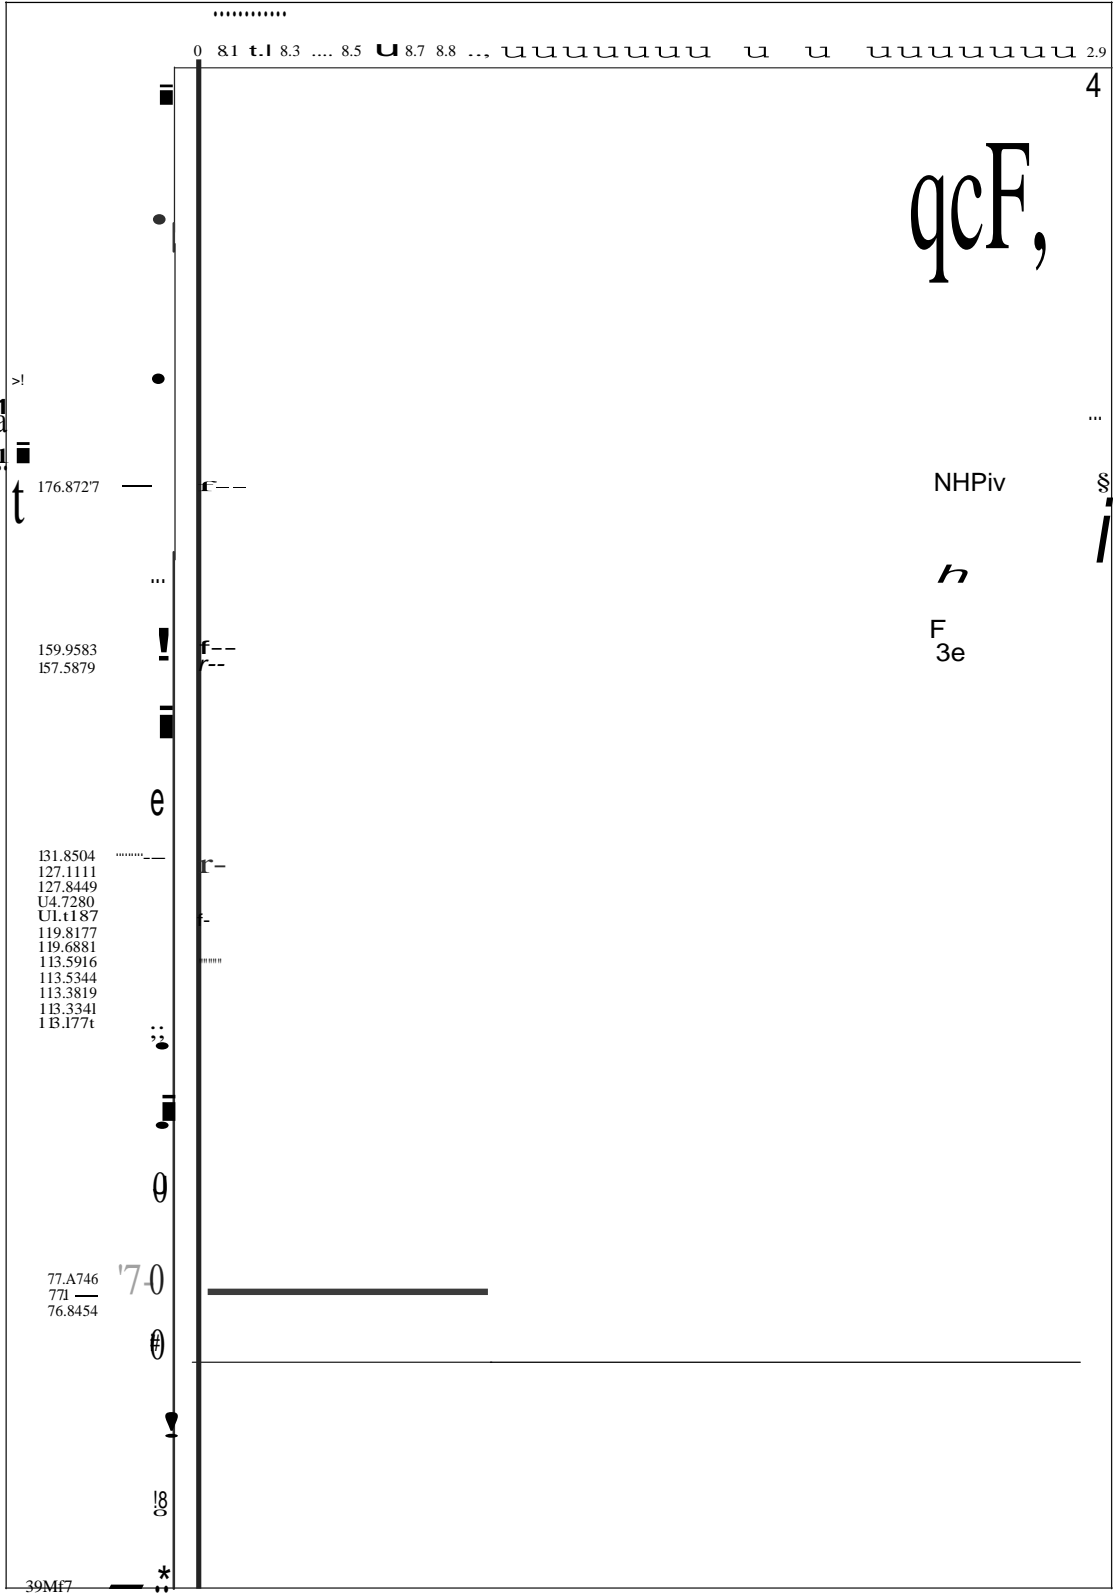

1. 2. 3. 4. 5. 6. 7. 8. 9. 10. 11. 12. 13. 14. 15. 16. 17. 18. 19. 20. 21. 22. 23. 24. 25. 26. 27. 28. 29. 30. 31. 32. 33. 34. 35. 36. 37. 38. 39. 40. 41. 42. 43. 44. 45. 46. 47. 48. 49. 50. 51. 52. 53. 54. 55. 56. 57. 58. 59. 60. 61. 62. 63. 64. 65. 66. 67. 68. 69. 70. 71. 72. 73. 74. 75. 76. 77. 78. 79. 80. 81. 82. 83. 84. 85. 86. 87. 88. 89. 90. 91. 92. 93. 94. 95. 96. 97. 98. 99. 100. 101. 102. 103. 104. 105. 106. 107. 108. 109. 110. 111. 112. 113. 114. 115. 116. 117. 118. 119. 120. 121. 122. 123. 124. 125. 126. 127. 128. 129. 130. 131. 132. 133. 134. 135. 136. 137. 138. 139. 140. 141. 142. 143. 144. 145. 146. 147. 148. 149. 150. 151. 152. 153. 154. 155. 156. 157. 158. 159. 160. 161. 162. 163. 164. 165. 166. 167. 168. 169. 170. 171. 172. 173. 174. 175. 176. 177. 178. 179. 180. 181. 182. 183. 184. 185. 186. 187. 188. 189. 190. 191. 192. 193. 194. 195. 196. 197. 198. 199. 200. 201. 202. 203. 204. 205. 206. 207. 208. 209. 210. 211. 212. 213. 214. 215. 216. 217. 218. 219. 220. 221. 222. 223. 224. 225. 226. 227. 228. 229. 230. 231. 232. 233. 234. 235. 236. 237. 238. 239. 240. 241. 242. 243. 244. 245. 246. 247. 248. 249. 250. 251. 252. 253. 254. 255. 256. 257. 258. 259. 260. 261. 262. 263. 264. 265. 266. 267. 268. 269. 270. 271. 272. 273. 274. 275. 276. 277. 278. 279. 280. 281. 282. 283. 284. 285. 286. 287. 288. 289. 290. 291. 292. 293. 294. 295. 296. 297. 298. 299. 300. 301. 302. 303. 304. 305. 306. 307. 308. 309. 310. 311. 312. 313. 314. 315. 316. 317. 318. 319. 320. 321. 322. 323. 324. 325. 326. 327. 328. 329. 330. 331. 332. 333. 334. 335. 336. 337. 338. 339. 340. 341. 342. 343. 344. 345. 346. 347. 348. 349. 350. 351. 352. 353. 354. 355. 356. 357. 358. 359. 360. 361. 362. 363. 364. 365. 366. 367. 368. 369. 370. 371. 372. 373. 374. 375. 376. 377. 378. 379. 380. 381. 382. 383. 384. 385. 386. 387. 388. 389. 390. 391. 392. 393. 394. 395. 396. 397. 398. 399. 400. 401. 402. 403. 404. 405. 406. 407. 408. 409. 410. 411. 412. 413. 414. 415. 416. 417. 418. 419. 420. 421. 422. 423. 424. 425. 426. 427. 428. 429. 430. 431. 432. 433. 434. 435. 436. 437. 438. 439. 440. 441. 442. 443. 444. 445. 446. 447. 448. 449. 450. 451. 452. 453. 454. 455. 456. 457. 458. 459. 460. 461. 462. 463. 464. 465. 466. 467. 468. 469. 470. 471. 472. 473. 474. 475. 476. 477. 478. 479. 480. 481. 482. 483. 484. 485. 486. 487. 488. 489. 490. 491. 492. 493. 494. 495. 496. 497. 498. 499. 500. 501. 502. 503. 504. 505. 506. 507. 508. 509. 510. 511. 512. 513. 514. 515. 516. 517. 518. 519. 520. 521. 522. 523. 524. 525. 526. 527. 528. 529. 530. 531. 532. 533. 534. 535. 536. 537. 538. 539. 540. 541. 542. 543. 544. 545. 546. 547. 548. 549. 550. 551. 552. 553. 554. 555. 556. 557. 558. 559. 560. 561. 562. 563. 564. 565. 566. 567. 568. 569. 570. 571. 572. 573. 574. 575. 576. 577. 578. 579. 580. 581. 582. 583. 584. 585. 586. 587. 588. 589. 590. 591. 592. 593. 594. 595. 596. 597. 598. 599. 600. 601. 602. 603. 604. 605. 606. 607. 608. 609. 610. 611. 612. 613. 614. 615. 616. 617. 618. 619. 620. 621. 622. 623. 624. 625. 626. 627. 628. 629. 630. 631. 632. 633. 634. 635. 636. 637. 638. 639. 640. 641. 642. 643. 644. 645. 646. 647. 648. 649. 650. 651. 652. 653. 654. 655. 656. 657. 658. 659. 660. 661. 662. 663. 664. 665. 666. 667. 668. 669. 670. 671. 672. 673. 674. 675. 676. 677. 678. 679. 680. 681. 682. 683. 684. 685. 686. 687. 688. 689. 690. 691. 692. 693. 694. 695. 696. 697. 698. 699. 700. 701. 702. 703. 704. 705. 706. 707. 708. 709. 710. 711. 712. 713. 714. 715. 716. 717. 718. 719. 720. 721. 722. 723. 724. 725. 726. 727. 728. 729. 730. 731. 732. 733. 734. 735. 736. 737. 738. 739. 740. 741. 742. 743. 744. 745. 746. 747. 748. 749. 750. 751. 752. 753. 754. 755. 756. 757. 758. 759. 760. 761. 762. 763. 764. 765. 766. 767. 768. 769. 770. 771. 772. 773. 774. 775. 776. 777. 778. 779. 780. 781. 782. 783. 784. 785. 786. 787. 788. 789. 790. 791. 792. 793. 794. 795. 796. 797. 798. 799. 800. 801. 802. 803. 804. 805. 806. 807. 808. 809. 810. 811. 812. 813. 814. 815. 816. 817. 818. 819. 820. 821. 822. 823. 824. 825. 826. 827. 828. 829. 830. 831. 832. 833. 834. 835. 836. 837. 838. 839. 840. 841. 842. 843. 844. 845. 846. 847. 848. 849. 850. 851. 852. 853. 854. 855. 856. 857. 858. 859. 860. 861. 862. 863. 864. 865. 866. 867. 868. 869. 870. 871. 872. 873. 874. 875. 876. 877. 878. 879. 880. 881. 882. 883. 884. 885. 886. 887. 888. 889. 890. 891. 892. 893. 894. 895. 896. 897. 898. 899. 900. 901. 902. 903. 904. 905. 906. 907. 908. 909. 910. 911. 912. 913. 914. 915. 916. 917. 918. 919. 920. 921. 922. 923. 924. 925. 926. 927. 928. 929. 930. 931. 932. 933. 934. 935. 936. 937. 938. 939. 940. 941. 942. 943. 944. 945. 946. 947. 948. 949. 950. 951. 952. 953. 954. 955. 956. 957. 958. 959. 960. 961. 962. 963. 964. 965. 966. 967. 968. 969. 970. 971. 972. 973. 974. 975. 976. 977. 978. 979. 980. 981. 982. 983. 984. 985. 986. 987. 988. 989. 990. 991. 992. 993. 994. 995. 996. 997. 998. 999. 1000. 1001. 1002. 1003. 1004. 1005. 1006. 1007. 1008. 1009. 1010. 1011. 1012. 1013. 1014. 1015. 1016. 1017. 1018. 1019. 1020. 1021. 1022. 1023. 1024. 1025. 1026. 1027. 1028. 1029. 1030. 1031. 1032. 1033. 1034. 1035. 1036. 1037. 1038. 1039. 1040. 1041. 1042. 1043. 1044. 1045. 1046. 1047. 1048. 1049. 1050. 1051. 1052. 1053. 1054. 1055. 1056. 1057. 1058. 1059. 1060. 1061. 1062. 1063. 1064. 1065. 1066. 1067. 1068. 1069. 1070. 1071. 1072. 1073. 1074. 1075. 1076. 1077. 1078. 1079. 1080. 1081. 1082. 1083. 1084. 1085. 1086. 1087. 1088. 1089. 1090. 1091. 1092. 1093. 1094. 1095. 1096. 1097. 1098. 1099. 1100. 1101. 1102. 1103. 1104. 1105. 1106. 1107. 1108. 1109. 1110. 1111. 1112. 1113. 1114. 1115. 1116. 1117. 1118. 1119. 1120. 1121. 1122. 1123. 1124. 1125. 1126. 1127. 1128. 1129. 1130. 1131. 1132. 1133. 1134. 1135. 1136. 1137. 1138. 1139. 1140. 1141. 1142. 1143. 1144. 1145. 1146. 1147. 1148. 1149. 1150. 1151. 1152. 1153. 1154. 1155. 1156. 1157. 1158. 1159. 1160. 1161. 1162. 1163. 1164. 1165. 1166. 1167. 1168. 1169. 1170. 1171. 1172. 1173. 1174. 1175. 1176. 1177. 1178. 1179. 1180. 1181. 1182. 1183. 1184. 1185. 1186. 1187. 1188. 1189. 1190. 1191. 1192. 1193. 1194. 1195. 1196. 1197. 1198. 1199. 1200. 1201. 1202. 1203. 1204. 1205. 1206. 1207. 1208. 1209. 1210. 1211. 1212. 1213. 1214. 1215. 1216. 1217. 1218. 1219. 1220. 1221. 1222. 1223. 1224. 1225. 1226. 1227. 1228. 1229. 1230. 1231. 1232. 1233. 1234. 1235. 1236. 1237. 1238. 1239. 1240. 1241. 1242. 1243. 1244. 1245. 1246. 1247. 1248. 1249. 1250. 1251. 1252. 1253. 1254. 1255. 1256. 1257. 1258. 1259. 1260. 1261. 1262. 1263. 1264. 1265. 1266. 1267. 1268. 1269. 1270. 1271. 1272. 1273. 1274. 1275. 1276. 1277. 1278. 1279. 1280. 1281. 1282. 1283. 1284. 1285. 1286. 1287. 1288. 1289. 1290. 1291. 1292. 1293. 1294. 1295. 1296. 1297. 1298. 1299. 1300. 1301. 1302. 1303. 1304. 1305. 1306. 1307. 1308. 1309. 1310. 1311. 1312. 1313. 1314. 1315. 1316. 1317. 1318. 1319. 1320. 1321. 1322. 1323. 1324. 1325. 1326. 1327. 1328. 1329. 1330. 1331. 1332. 1333. 1334. 1335. 1336. 1337. 1338. 1339. 1340. 1341. 1342. 1343. 1344. 1345. 1346. 1347. 1348. 1349. 1350. 1351. 1352. 1353. 1354. 1355. 1356. 1357. 1358. 1359. 1360. 1361. 1362. 1363. 1364. 1365. 1366. 1367. 1368. 1369. 1370. 1371. 1372. 1373. 1374. 1375. 1376. 1377. 1378. 1379. 1380. 1381. 1382. 1383. 1384. 1385. 1386. 1387. 1388. 1389. 1390. 1391. 1392. 1393. 1394. 1395. 1396. 1397. 1398. 1399. 1400. 1401. 1402. 1403. 1404. 1405. 1406. 1407. 1408. 1409. 1410. 1411. 1412. 1413. 1414. 1415. 1416. 1417. 1418. 1419. 1420. 1421. 1422. 1423. 1424. 1425. 1426. 1427. 1428. 1429. 1430. 1431. 1432. 1433. 1434. 1435. 1436. 1437. 1438. 1439. 1440. 1441. 1442. 1443. 1444. 1445. 1446. 1447. 1448. 1449. 1450. 1451. 1452. 1453. 1454. 1455. 1456. 1457. 1458. 1459. 1460. 1461. 1462. 1463. 1464. 1465. 1466. 1467. 1468. 1469. 1470. 1471. 1472. 1473. 1474. 1475. 1476. 1477. 1478. 1479. 1480. 1481. 1482. 1483. 1484. 1485. 1486. 1487. 1488. 1489. 1490. 1491. 1492. 1493. 1494. 1495. 1496. 1497. 1498. 1499. 1500. 1501. 1502. 1503. 1504. 1505. 1506. 1507. 1508. 1509. 1510. 1511. 1512. 1513. 1514. 1515. 1516. 1517. 1518. 1519. 1520. 1521. 1522. 1523. 1524. 1525. 1526. 1527. 1528. 1529. 1530. 1531. 1532. 1533. 1534. 1535. 1536. 1537. 1538. 1539. 1540. 1541. 1542. 1543. 1544. 1545. 1546. 1547. 1548. 1549. 1550. 1551. 1552. 1553. 1554. 1555. 1556. 1557. 1558. 1559. 1560. 1561. 1562. 1563. 1564. 1565. 1566. 1567. 1568. 1569. 1570. 1571. 1572. 1573. 1574. 1575. 1576. 1577. 1578. 1579. 1580. 1581. 1582. 1583. 1584. 1585. 1586. 1587. 1588. 1589. 1590. 1591. 1592. 1593. 1594. 1595. 1596. 1597. 1598. 1599. 1600. 1601. 1602. 1603. 1604. 1605. 1606. 1607. 1608. 1609. 1610. 1611. 1612. 1613. 1614. 1615. 1616. 1617. 1618. 1619. 1620. 1621. 1622. 1623. 1624. 1625. 1626. 1627. 1628. 1629. 1630. 1631. 1632. 1633. 1634. 1635. 1636. 1637. 1638. 1639. 1640. 1641. 1642. 1643. 1644. 1645. 1646. 1647. 1648. 1649. 1650. 1651. 1652. 1653. 1654. 1655. 1656. 1657. 1658. 1659. 1660. 1661. 1662. 1663. 1664. 1665. 1666. 1667. 1668. 1669. 1670. 1671. 1672. 1673. 1674. 1675. 1676. 1677. 1678. 1679. 1680. 1681. 1682. 1683. 1684. 1685. 1686. 1687. 1688. 1689. 1690. 1691. 1692. 1693. 1694. 1695. 1696. 1697. 1698. 1699. 1700. 1701. 1702. 1703. 1704. 1705. 1706. 1707. 1708. 1709. 1710. 1711. 1712. 1713. 1714. 1715. 1716. 1717. 1718. 1719. 1720. 1721. 1722. 1723. 1724. 1725. 1726. 1727. 1728. 1729. 1730. 1731. 1732. 1733. 1734. 1735. 1736. 1737. 1738. 1739. 1740. 1741. 1742. 1743. 1744. 1745. 1746. 1747. 1748. 1749. 1750. 1751. 1752. 1753. 1754. 1755. 1756. 1757. 1758. 1759. 1760. 1761. 1762. 1763. 1764. 1765. 1766. 1767. 1768. 1769. 1770. 1771. 1772. 1773. 1774. 1775. 1776. 1777. 1778. 1779. 1780. 1781. 1782. 1783. 1784. 1785. 1786. 1787. 1788. 1789. 1790. 1791. 1792. 1793. 1794. 1795. 1796. 1797. 1798. 1799. 1800. 1801. 1802. 1803. 1804. 1805. 1806. 1807. 1808. 1809. 1810. 1811. 1812. 1813. 1814. 1815. 1816. 1817. 1818. 1819. 1820. 1821. 1822. 1823. 1824. 1825. 1826. 1827. 1828. 1829. 1830. 1831. 1832. 1833. 1834. 1835. 1836. 1837. 1838. 1839. 1840. 1841. 1842. 1843. 1844. 1845. 1846. 1847. 1848. 1849. 1850. 1851. 1852. 1853. 1854. 1855. 1856. 1857. 1858. 1859. 1860. 1861. 1862. 1863. 1864. 1865. 1866. 1867. 1868. 1869. 1870. 1871. 1872. 1873. 1874. 1875. 1876. 1877. 1878. 1879. 1880. 1881. 1882. 1883. 1884. 1885. 1886. 1887. 1888. 1889. 1890. 1891. 1892. 1893. 1894. 1895. 1896. 1897. 1898. 1899. 1900. 1901. 1902. 1903. 1904. 1905. 1906. 1907. 1908. 1909. 1910. 1911. 1912. 1913. 1914. 1915. 1916. 1917. 1918. 1919. 1920. 1921. 1922. 1923. 1924. 1925. 1926. 1927. 1928. 1929. 1930. 1931. 1932. 1933. 1934. 1935. 1936. 1937. 1938. 1939. 1940. 1941. 1942. 1943. 1944. 1945. 1946. 1947. 1948. 1949. 1950. 1951. 1952. 1953. 1954. 1955. 1956. 1957. 1958. 1959. 1960. 1961. 1962. 1963. 1964. 1965. 1966. 1967. 1968. 1969. 1970. 1971. 1972. 1973. 1974. 1975. 1976. 1977. 1978. 1979. 1980. 1981. 1982. 1983. 1984. 1985. 1986. 1987. 1988. 1989. 1990. 1991. 1992. 1993. 1994. 1995. 1996. 1997. 1998. 1999. 2000. 2001. 2002. 2003. 2004. 2005. 2006. 2007. 2008. 2009. 2010. 2011. 2012. 2013. 2014. 2015. 2016. 2017. 2018. 2019. 2020. 2021. 2022. 2023. 2024. 2025. 2026. 2027. 2028. 2029. 2030. 2031. 2032. 2033. 2034. 2035. 2036. 2037. 2038. 2039. 2040. 2041. 2042. 2043. 2044. 2045. 2046. 2047. 2048. 2049. 2050. 2051. 2052. 2053. 2054. 2055. 2056. 2057. 2058. 2059. 2060. 2061. 2062. 2063. 2064. 2065. 2066. 2067. 2068. 2069. 2070. 2071. 2072. 2073. 2074. 2075. 2076. 2077. 2078. 2079. 2080. 2081. 2082. 2083. 2084. 2085. 2086. 2087. 2088. 2089. 2090. 2091. 2092. 2093. 2094. 2095. 2096. 2097. 2098. 2099. 2100. 2101. 2102. 2103. 2104. 2105. 2106. 2107. 2108. 2109. 2110. 2111. 2112. 2113. 2114. 2115. 2116. 2117. 2118. 2119. 2120. 2121. 2122. 2123. 2124. 2125. 2126. 2127. 2128. 2129. 2130. 2131. 2132. 2133. 2134. 2135. 2136. 2137. 2138. 2139. 2140. 2141. 2142. 2143. 2144. 2145. 2146. 2147. 2148. 2149. 2150. 2151. 2152. 2153. 2154. 2155. 2156. 2157. 2158. 2159. 2160. 2161. 2162. 2163. 2164. 2165. 2166. 2167. 2168. 2169. 2170. 2171. 2172. 2173. 2174. 2175. 2176. 2177. 2178. 2179. 2180. 2181. 2182. 2183. 2184. 2185. 2186. 2187. 2188. 2189. 2190. 2191. 2192. 2193. 2194. 2195. 2196. 2197. 2198. 2199. 2200. 2201. 2202. 2203. 2204. 2205. 2206. 2207. 2208. 2209. 2210. 2211. 2212. 2213. 2214. 2215. 2216. 2217. 2218. 2219. 2220. 2221. 2222. 2223. 2224. 2225. 2226. 2227. 2228. 2229. 2230. 2231. 2232. 2233. 2234. 223

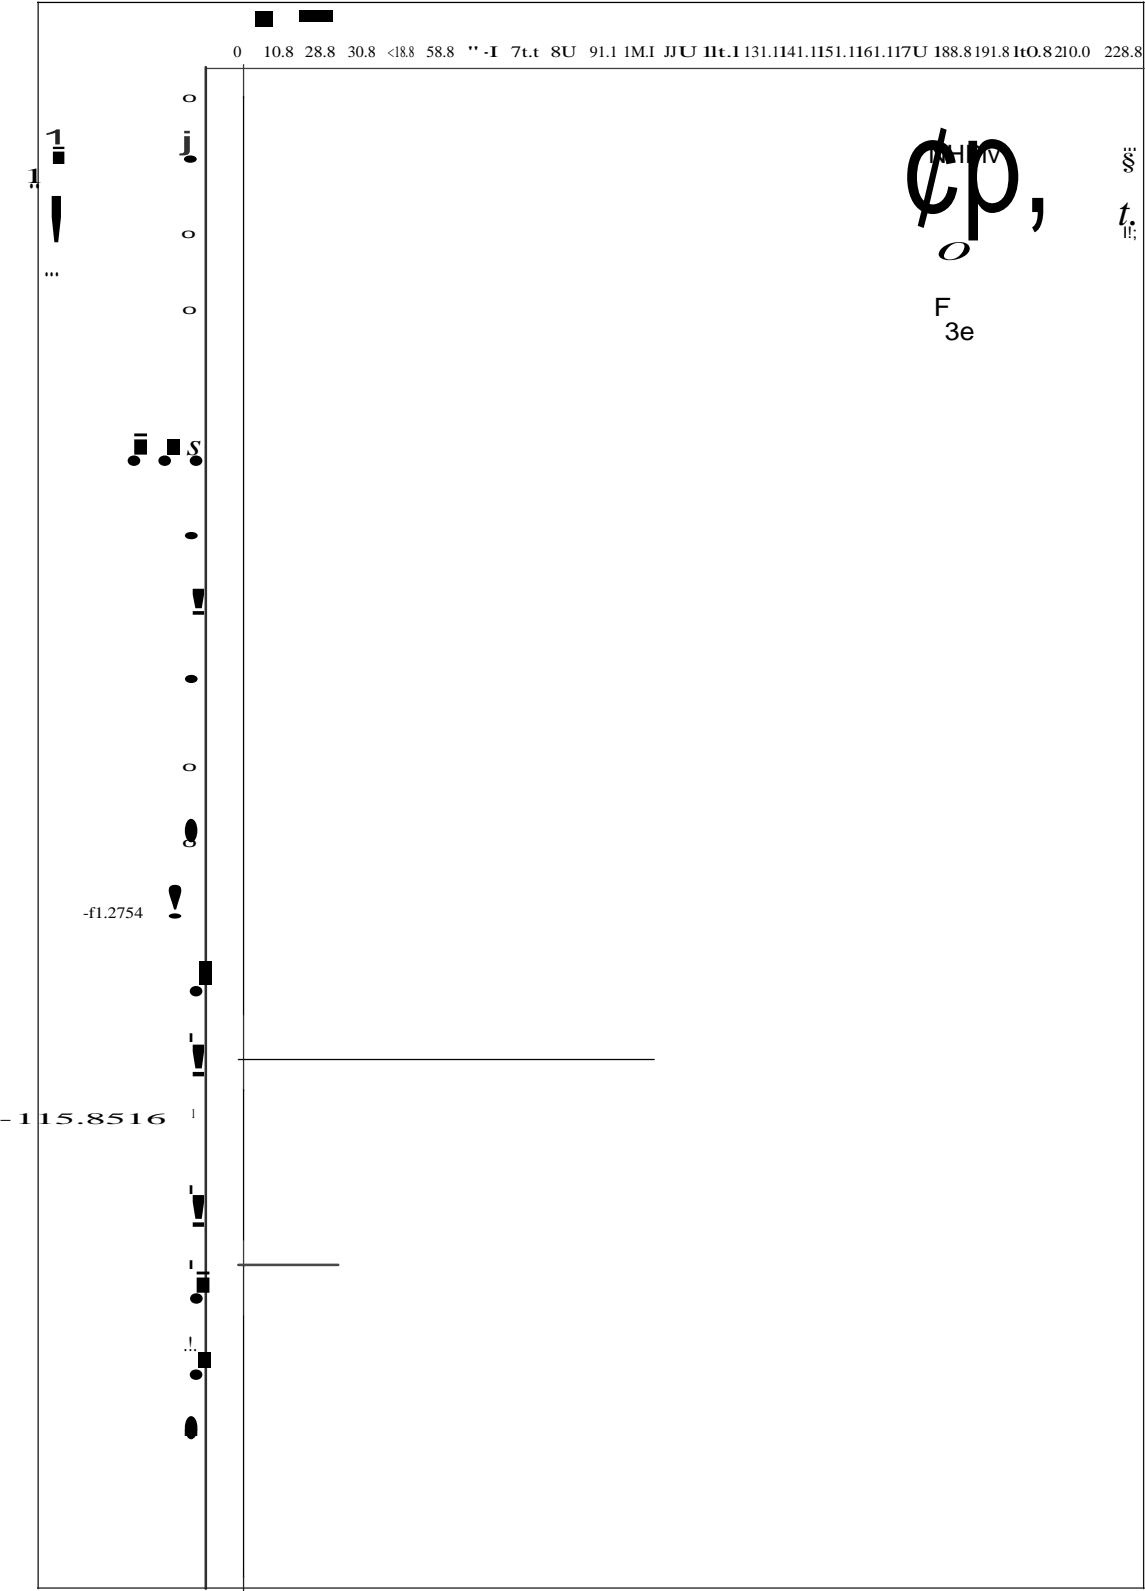

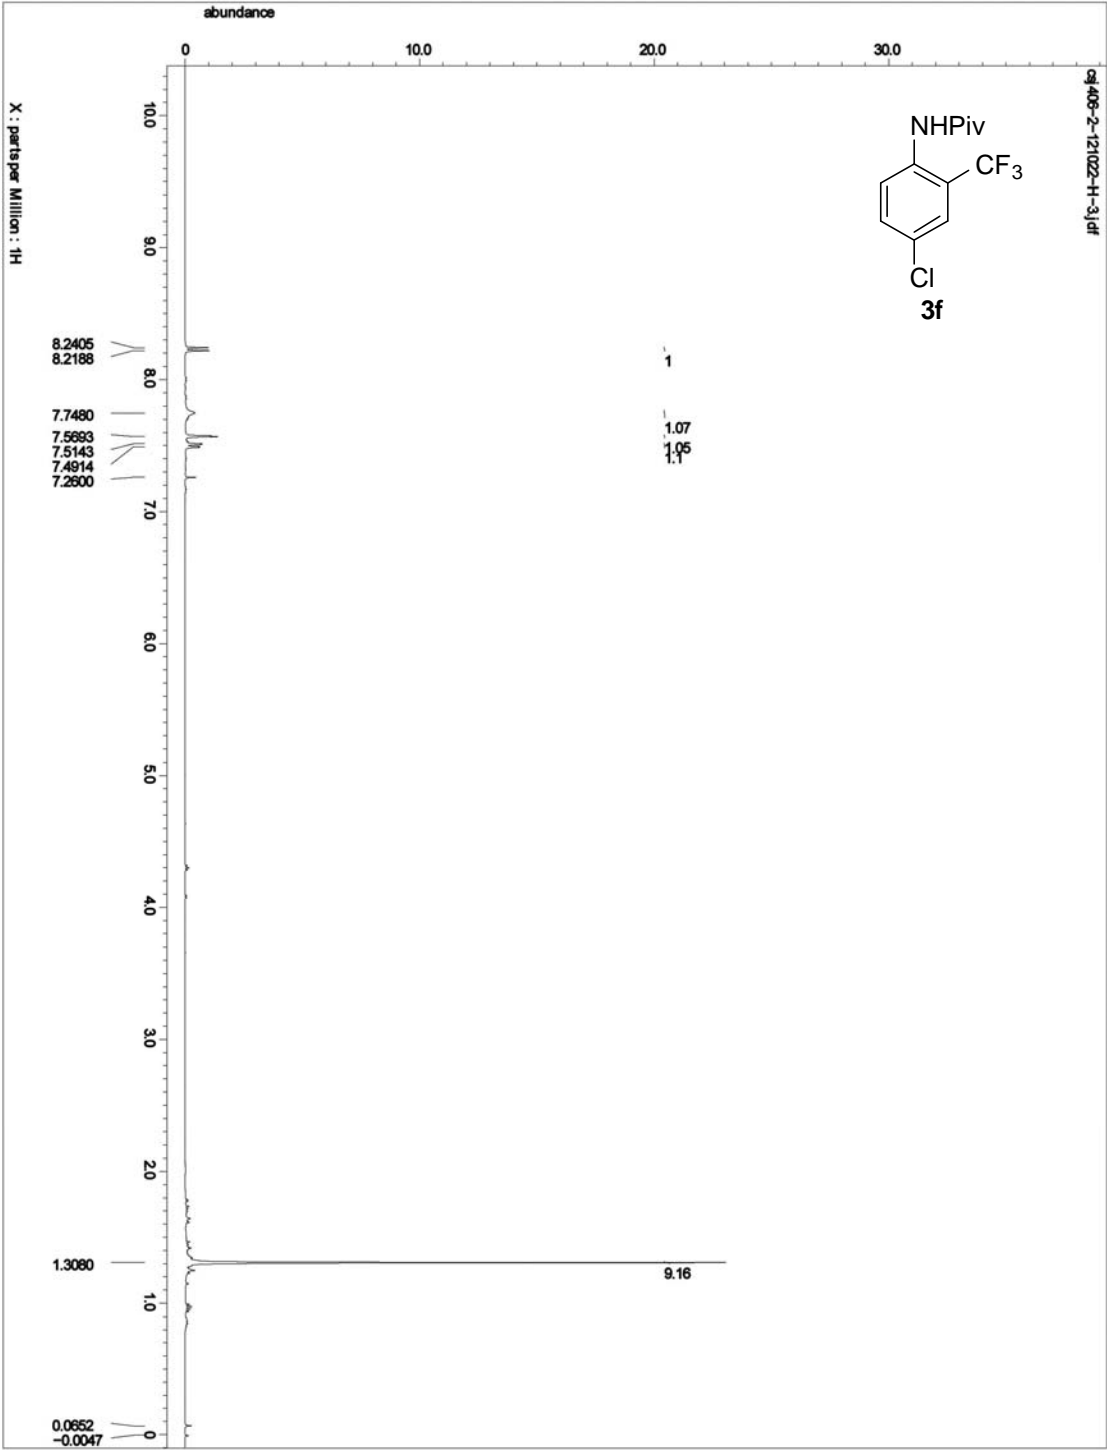

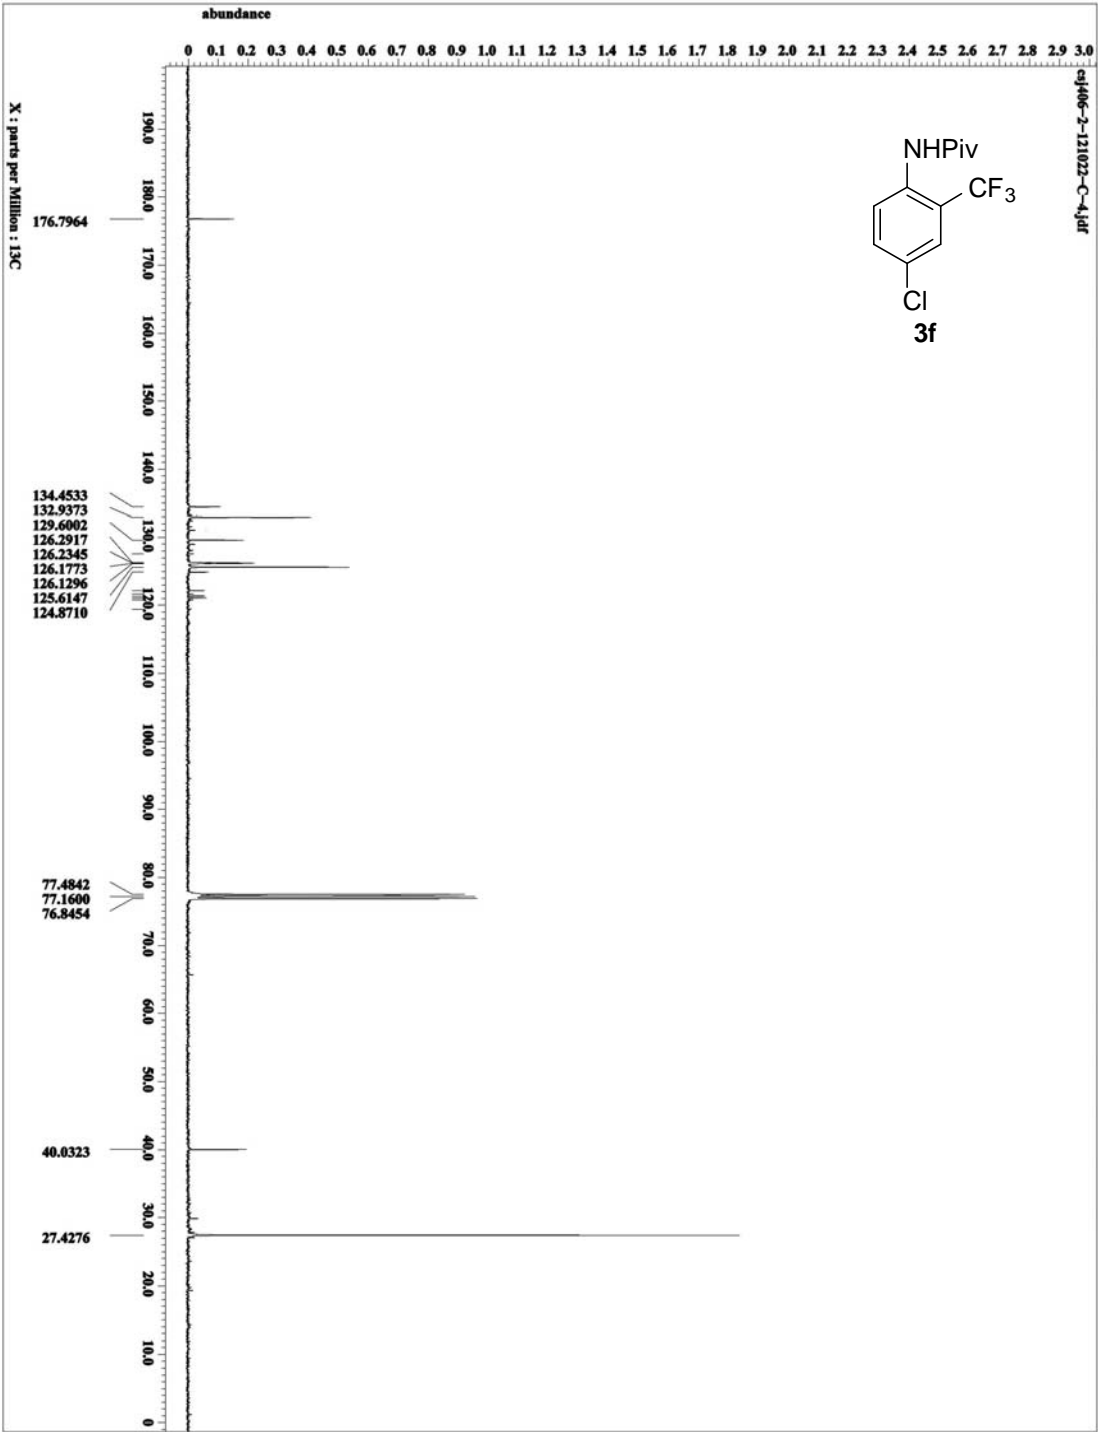

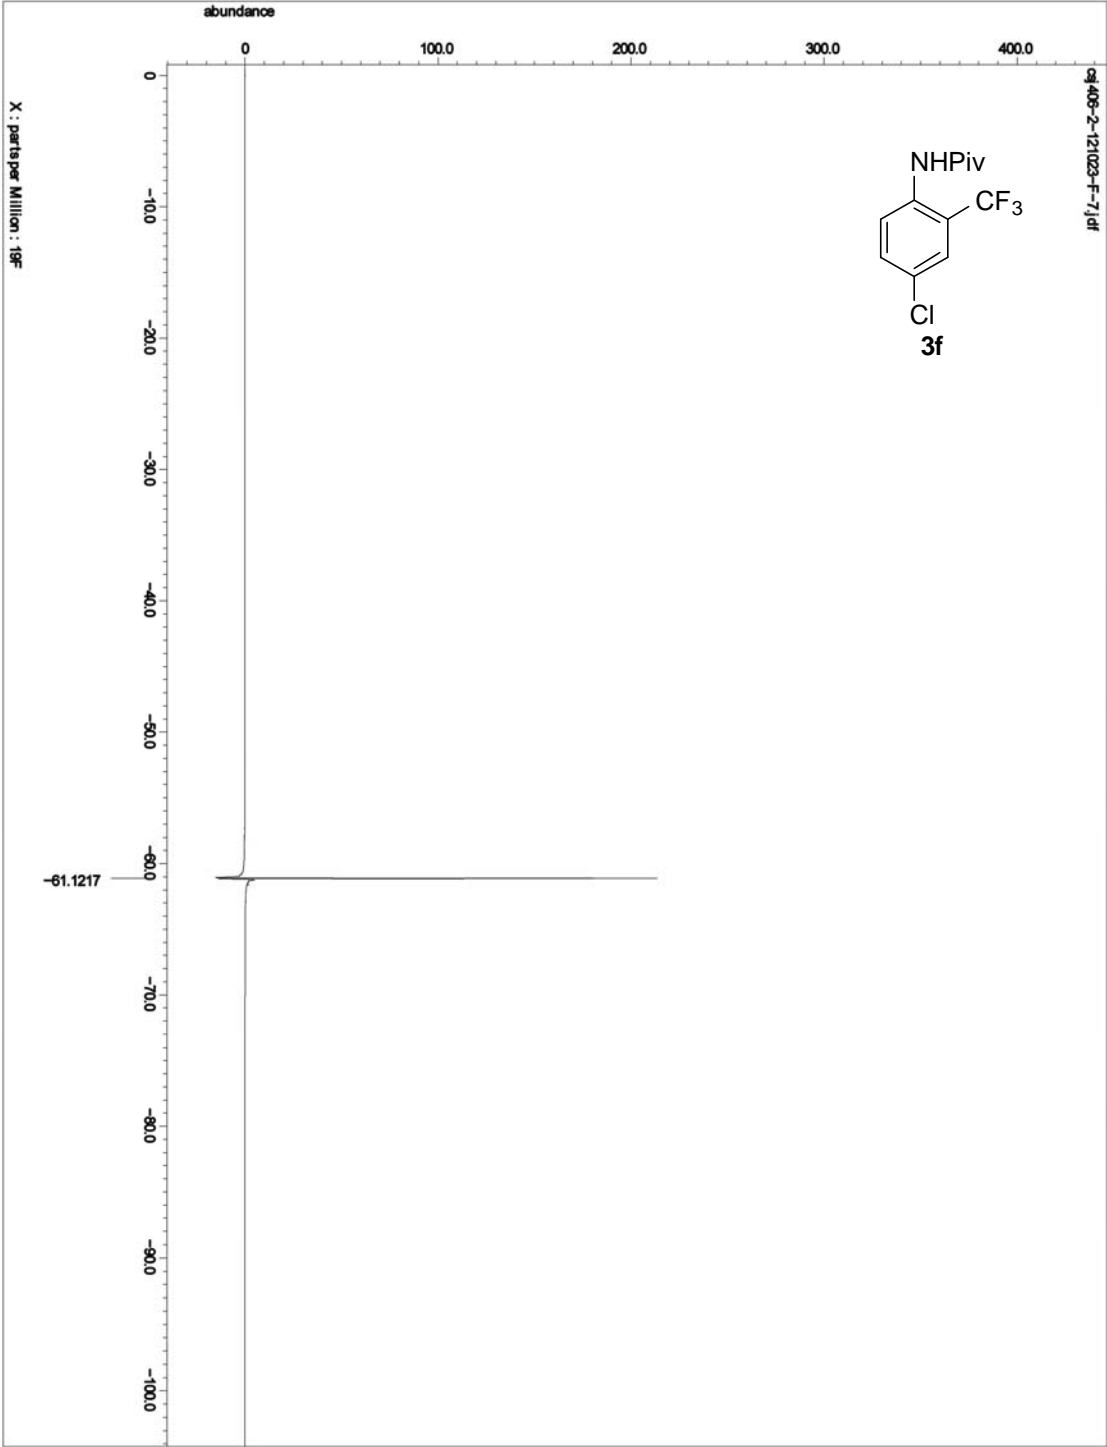

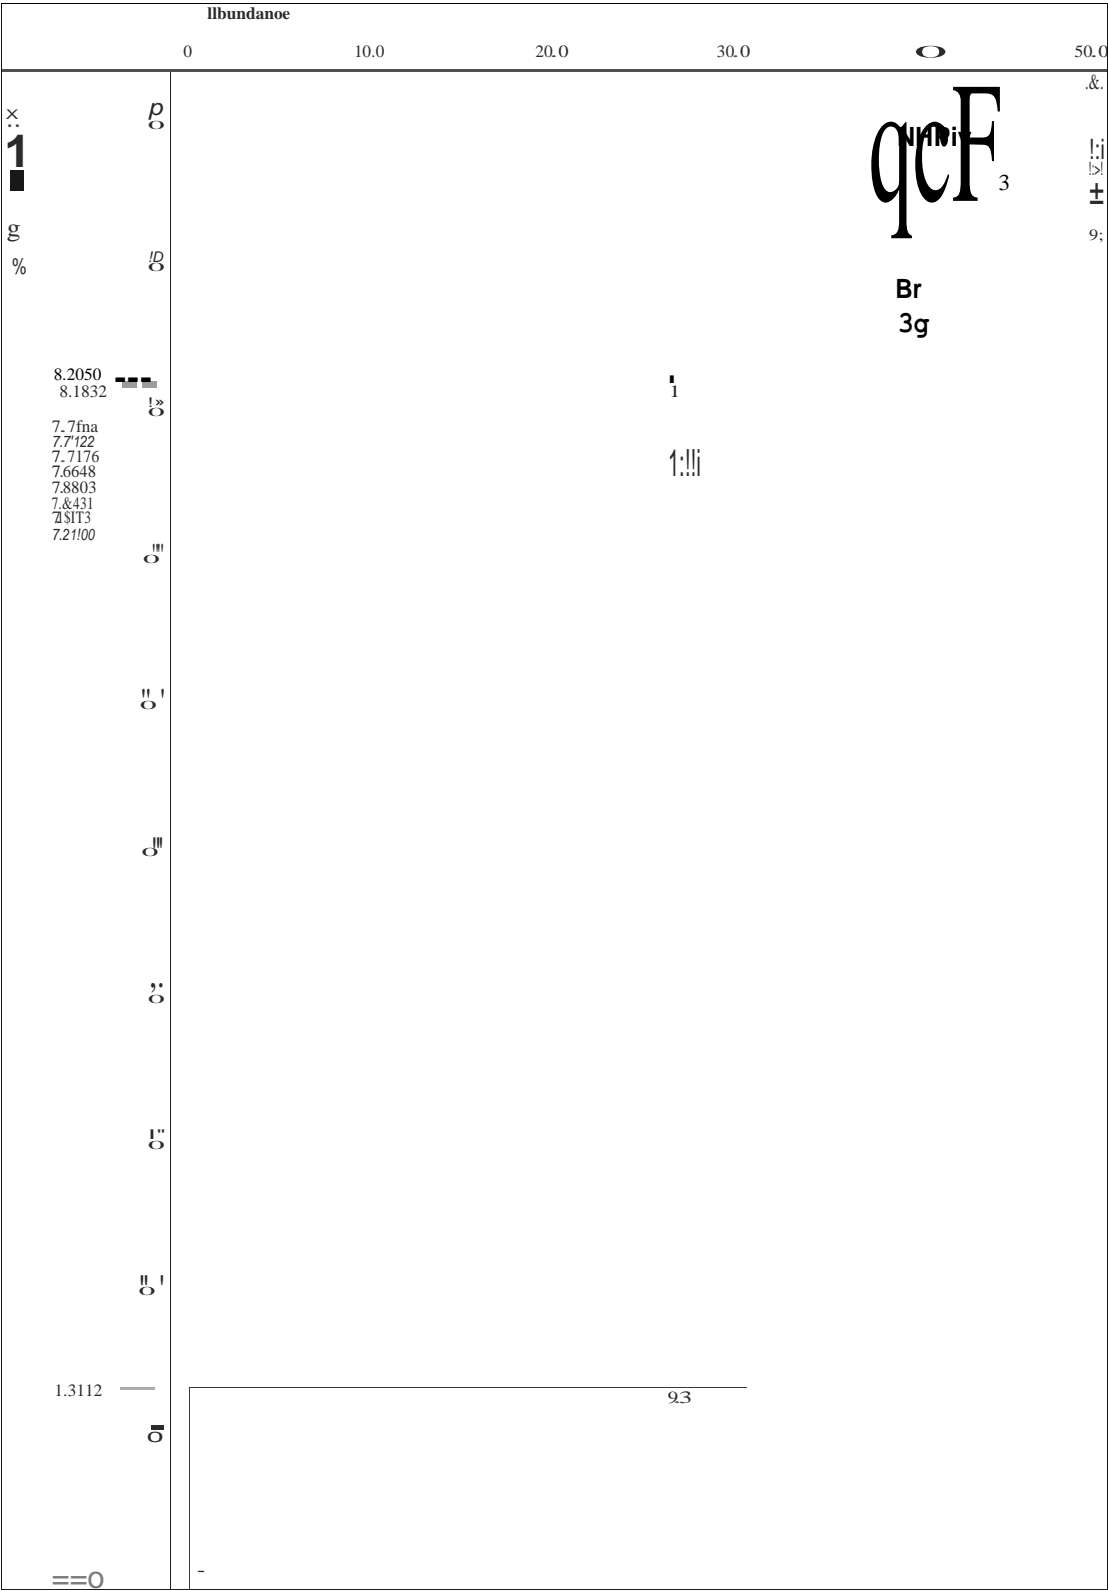

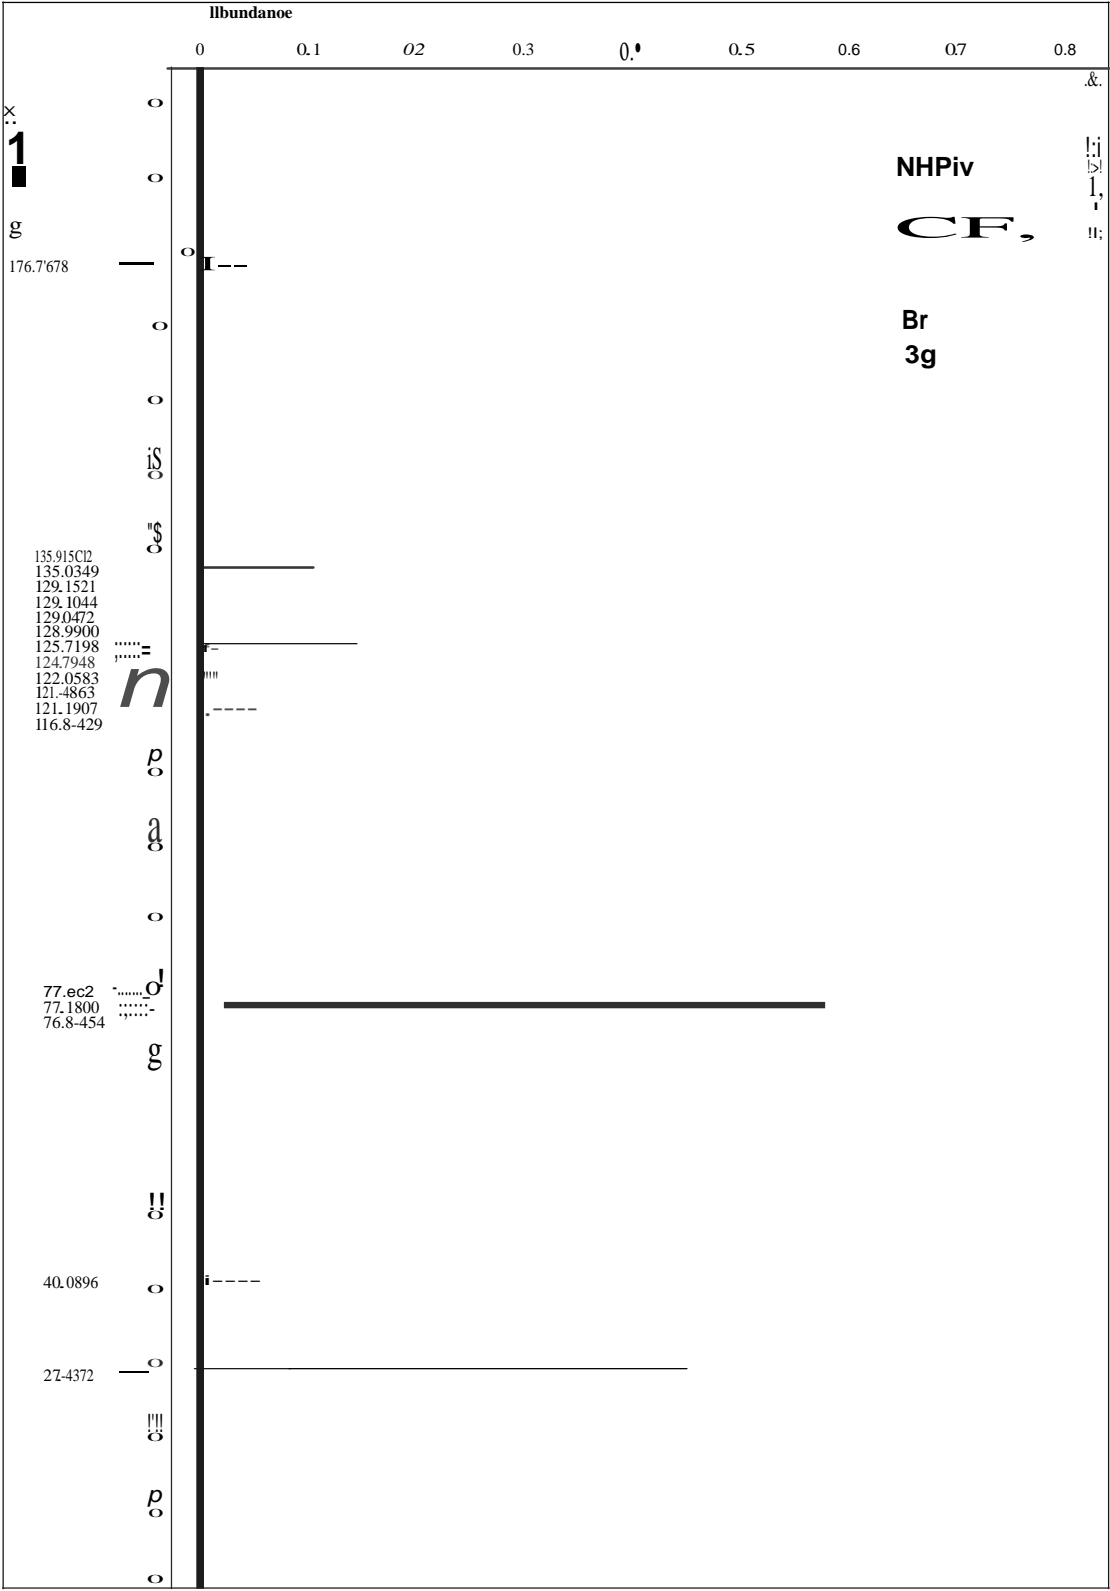

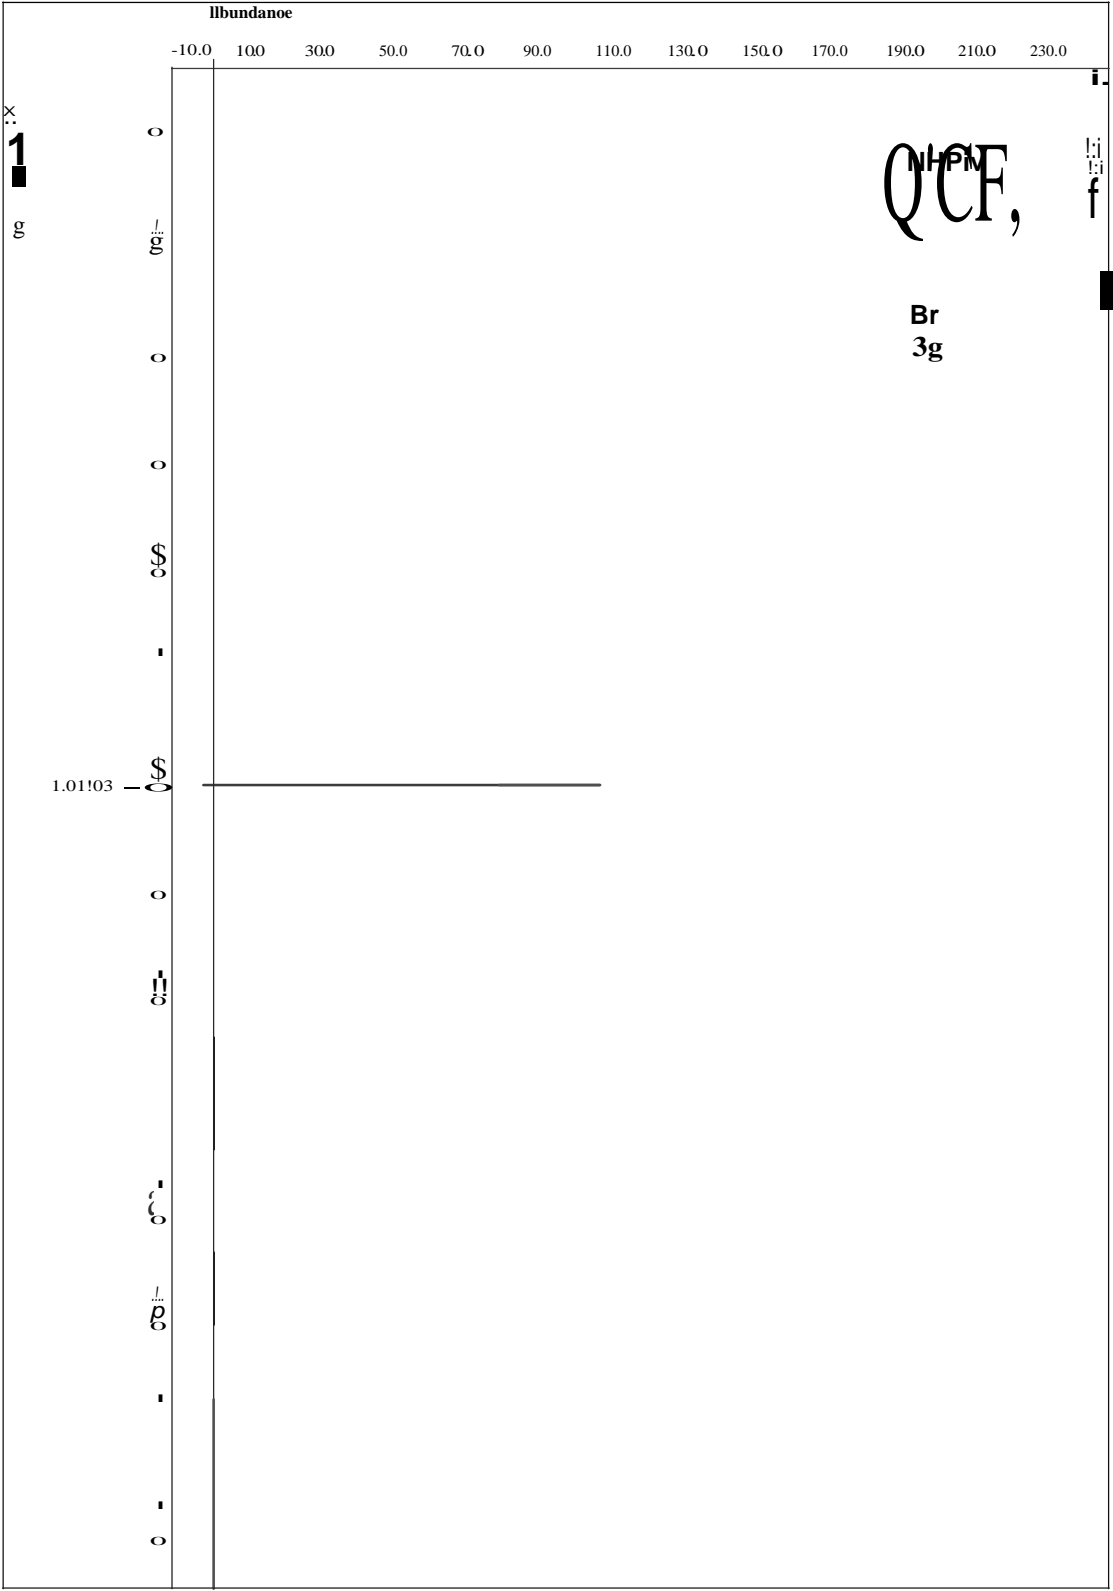

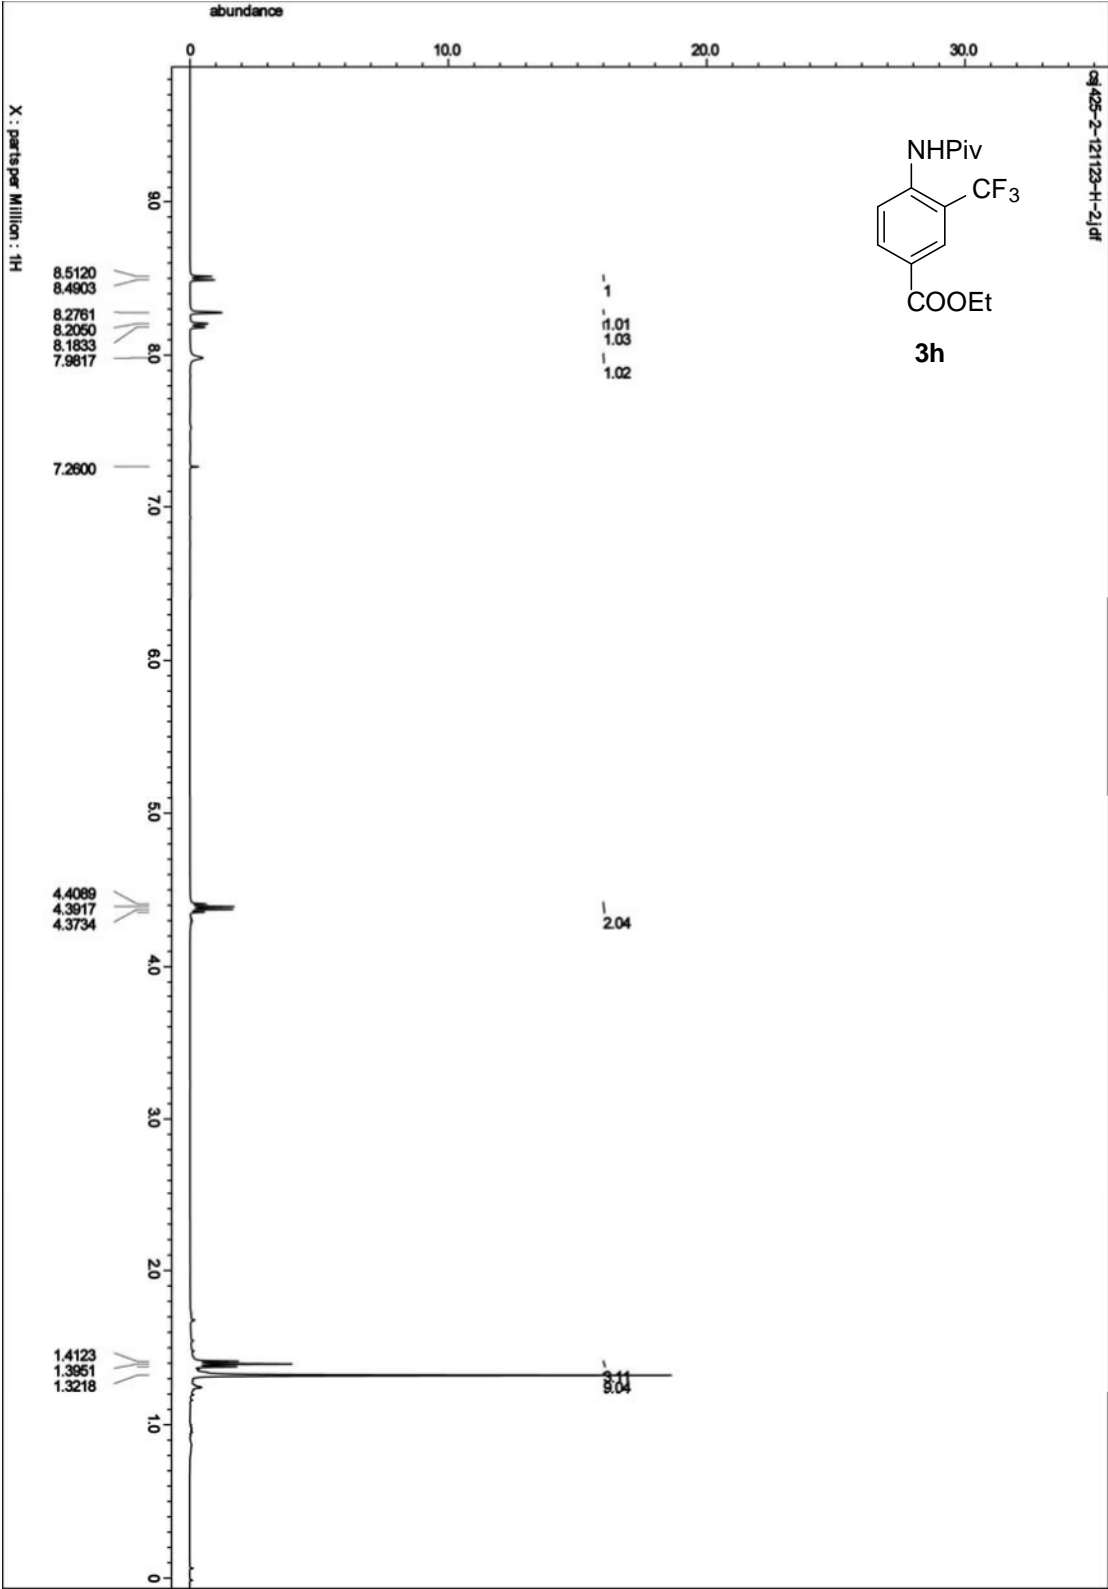

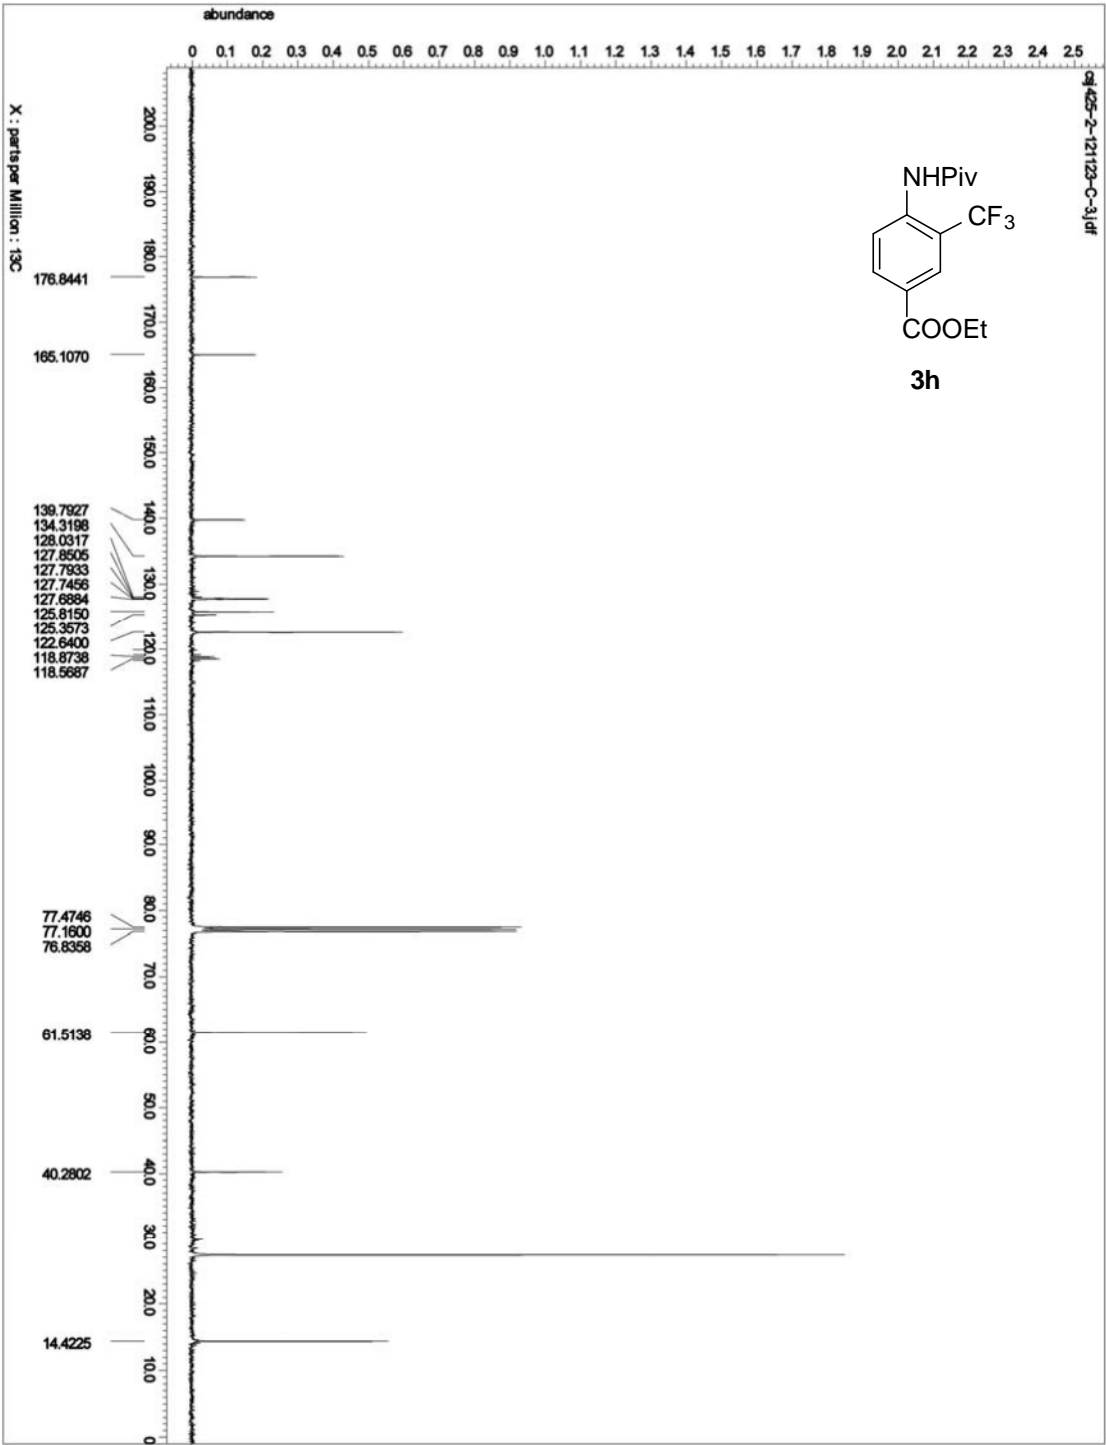

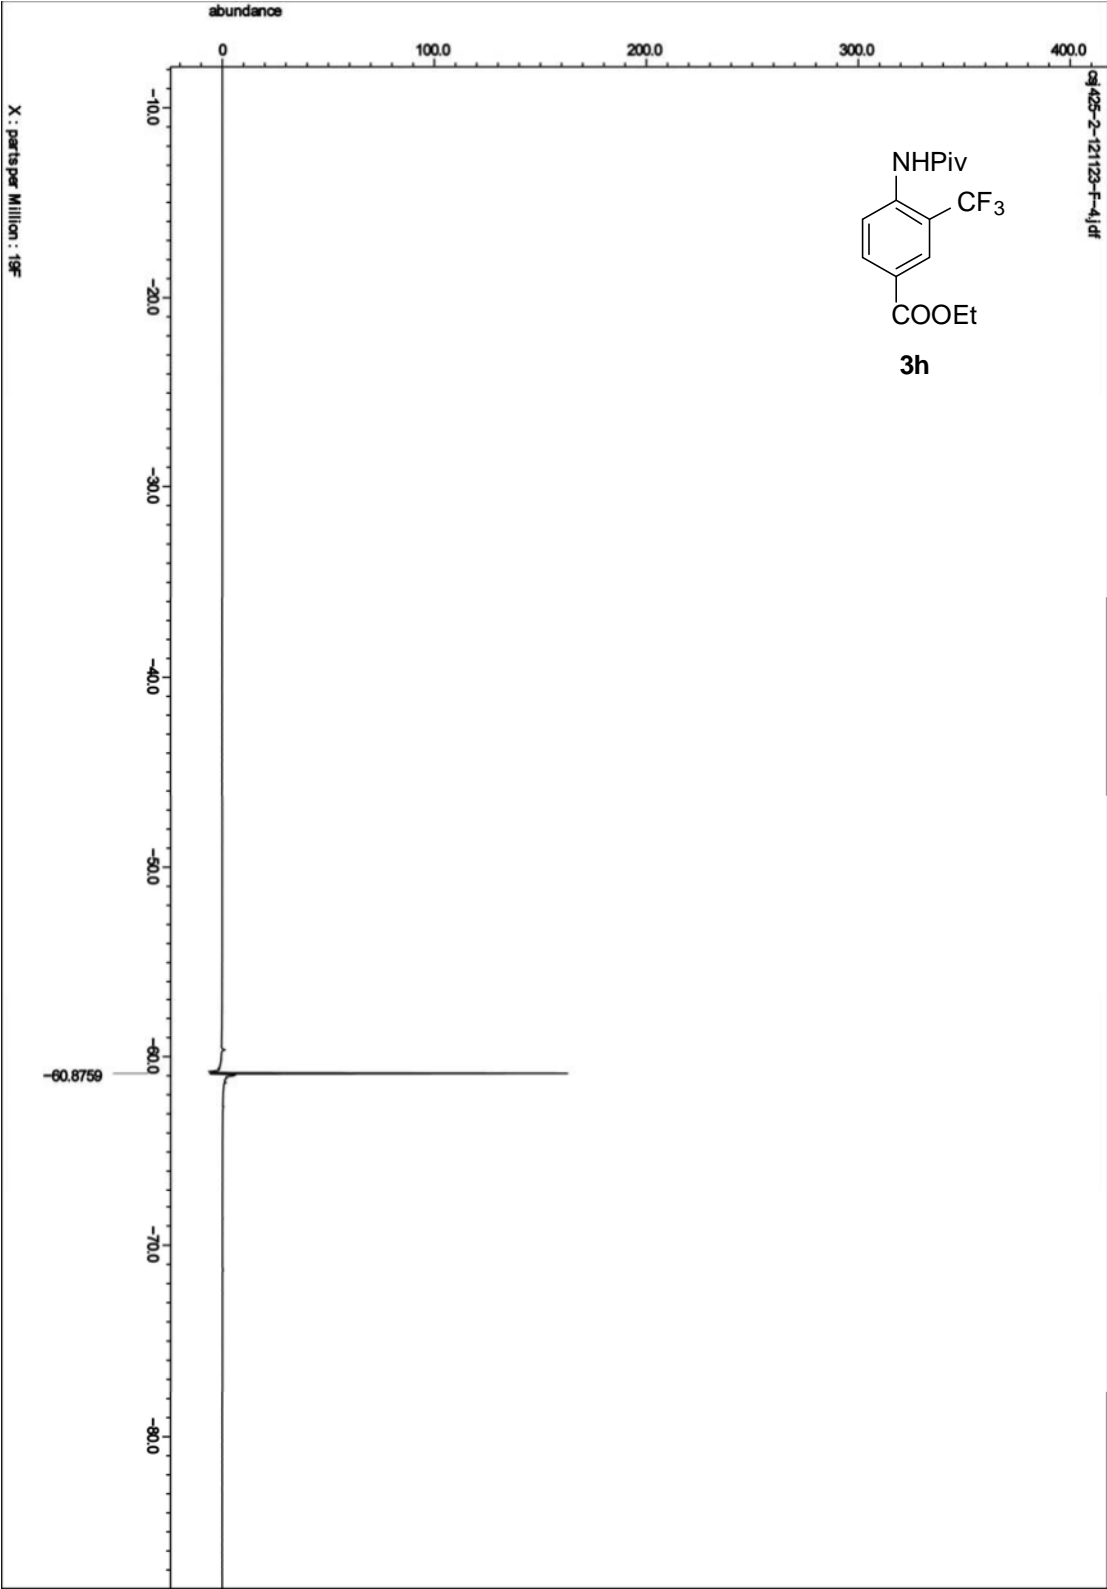

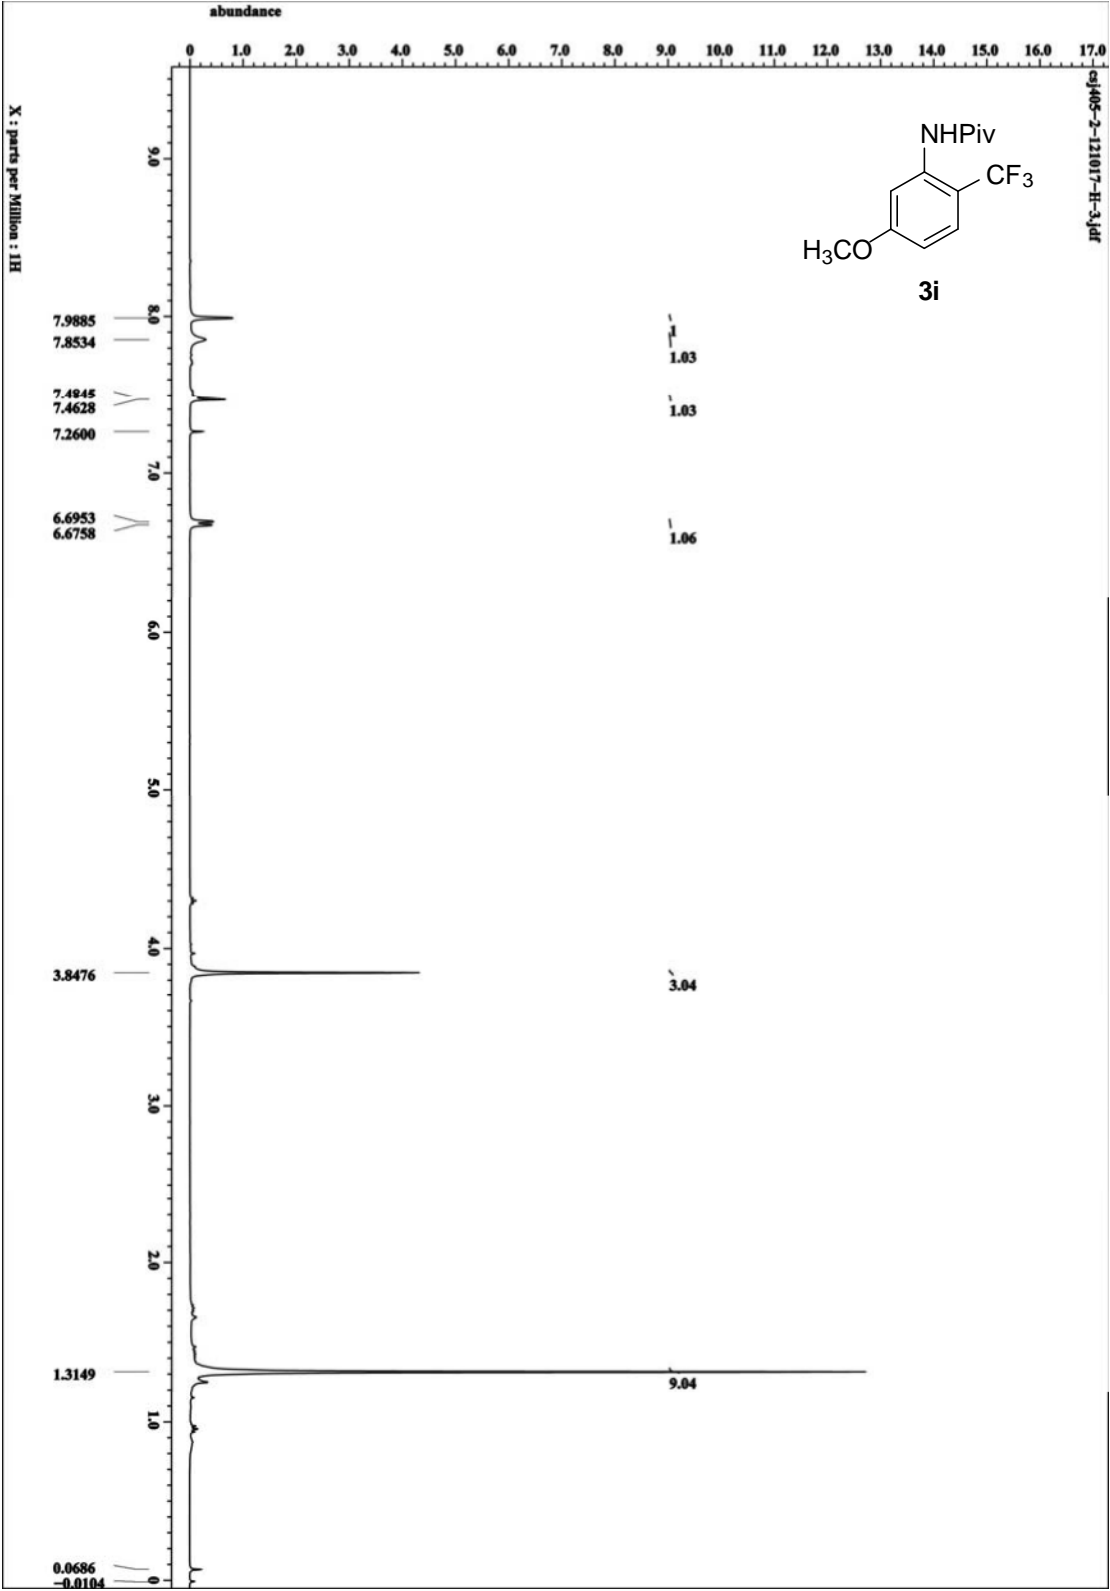

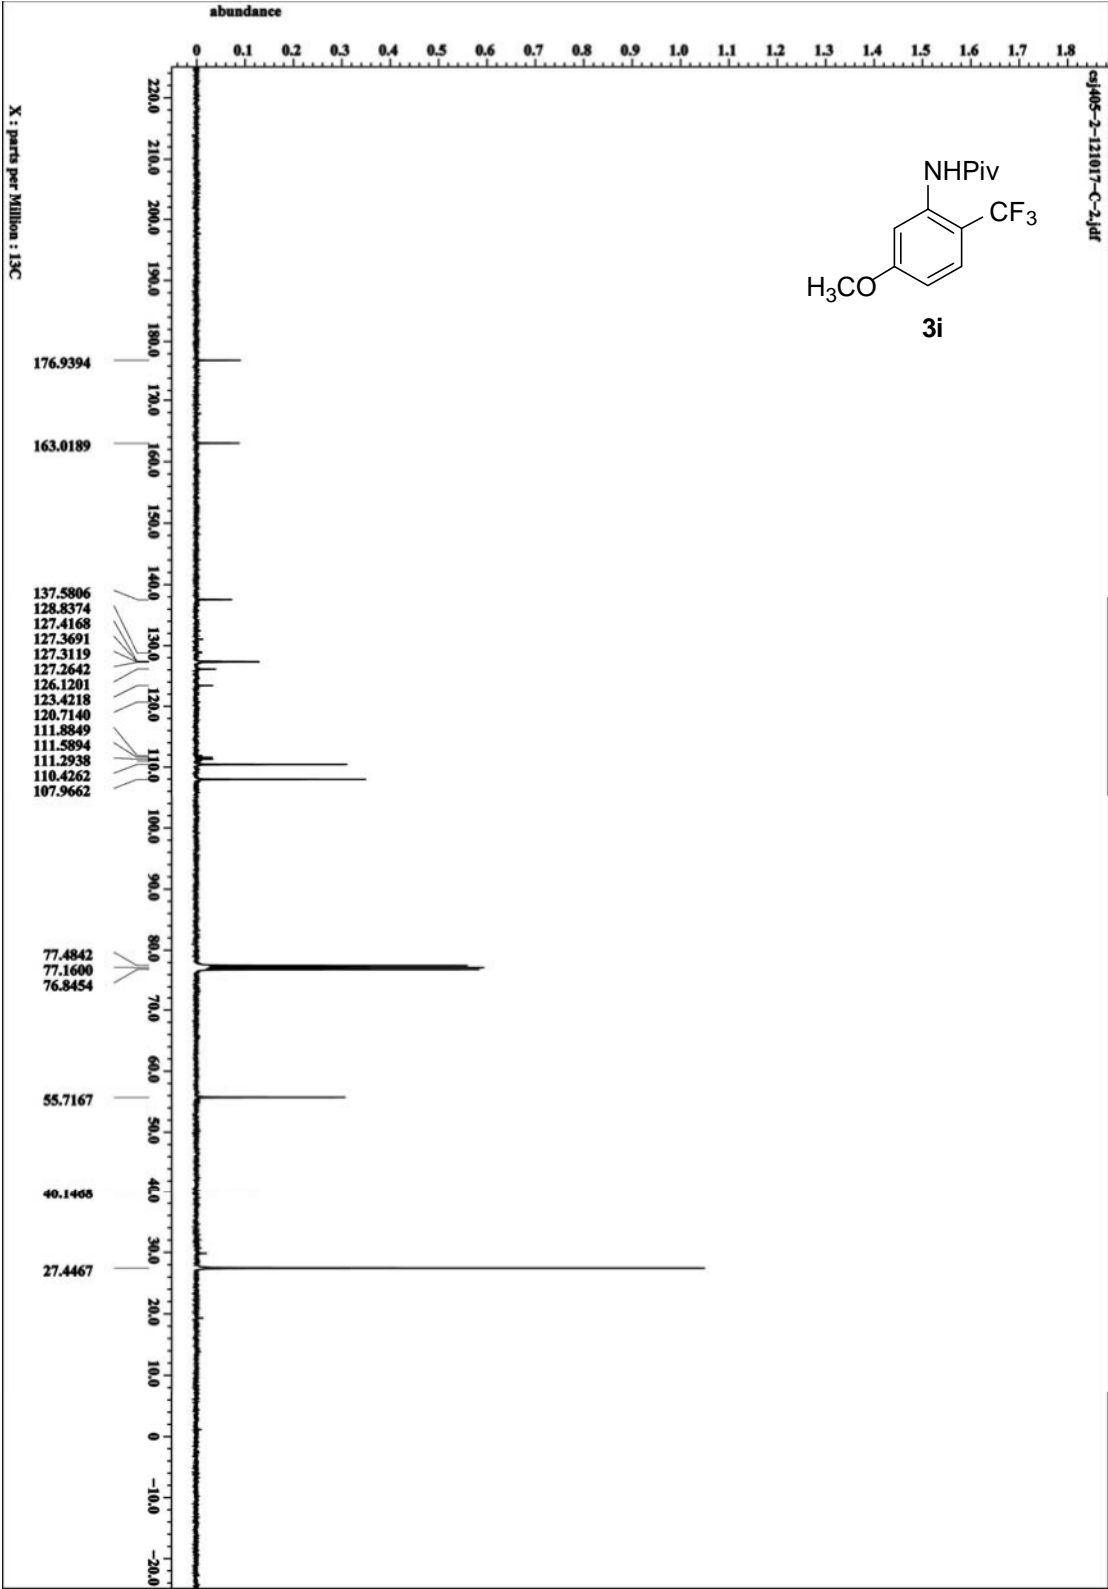

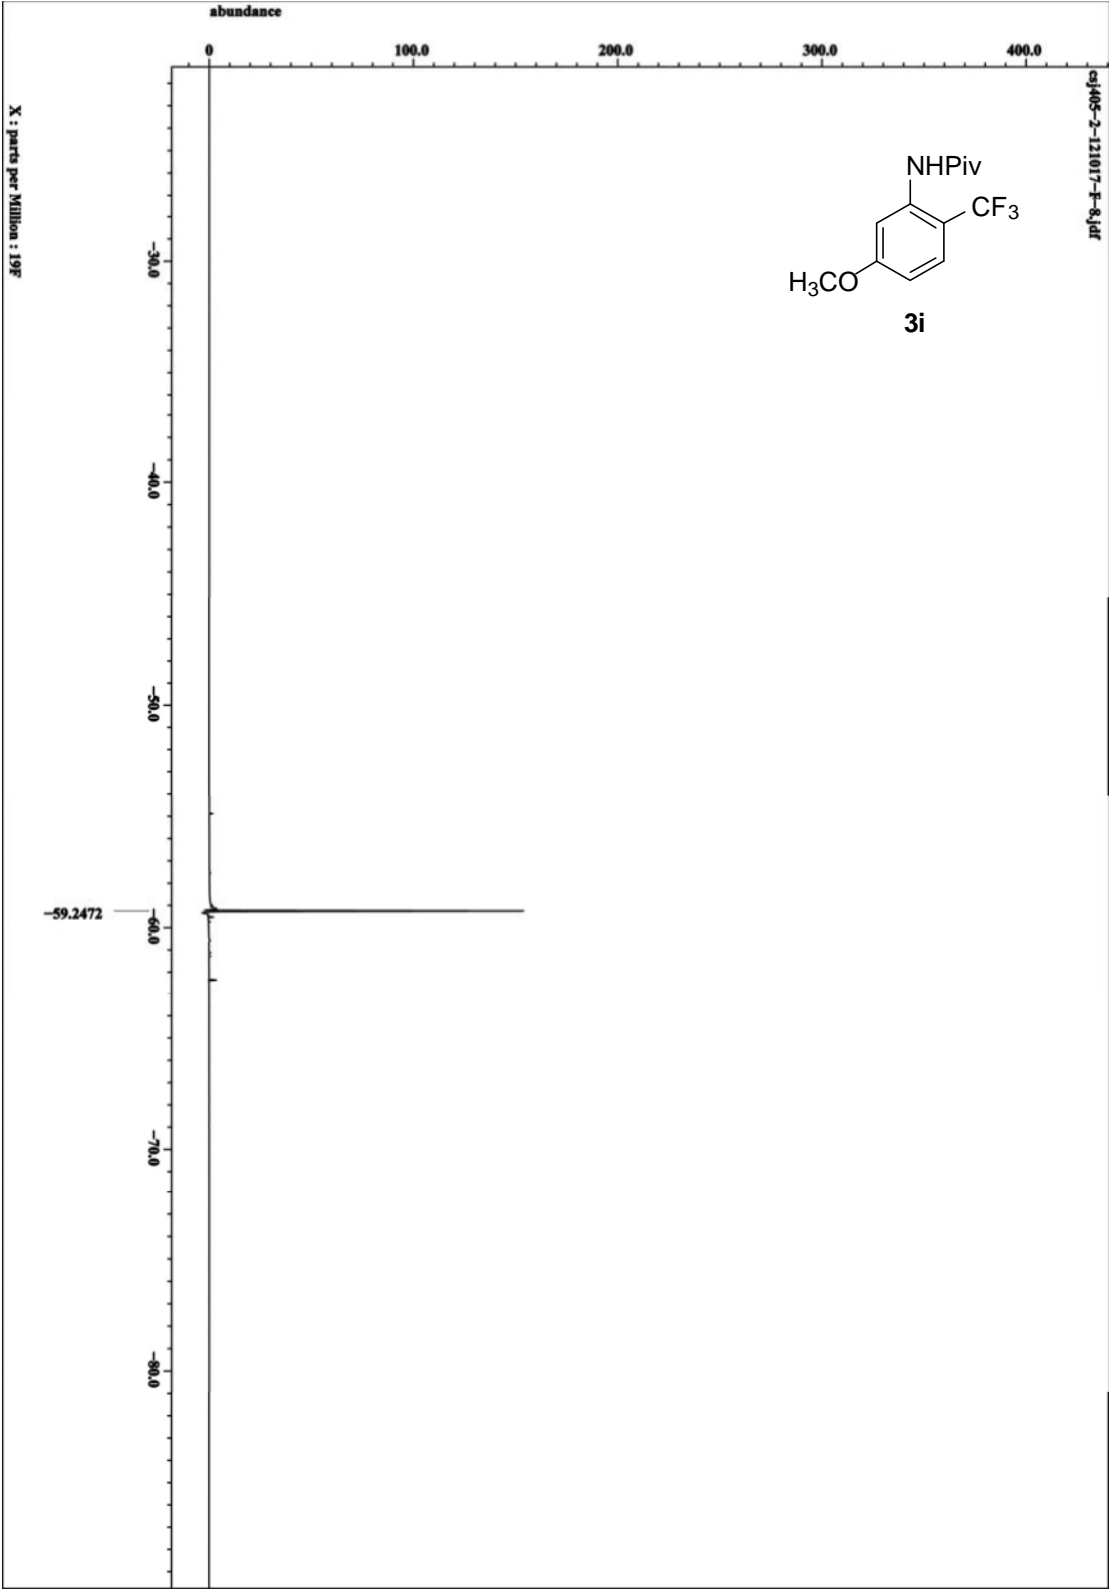

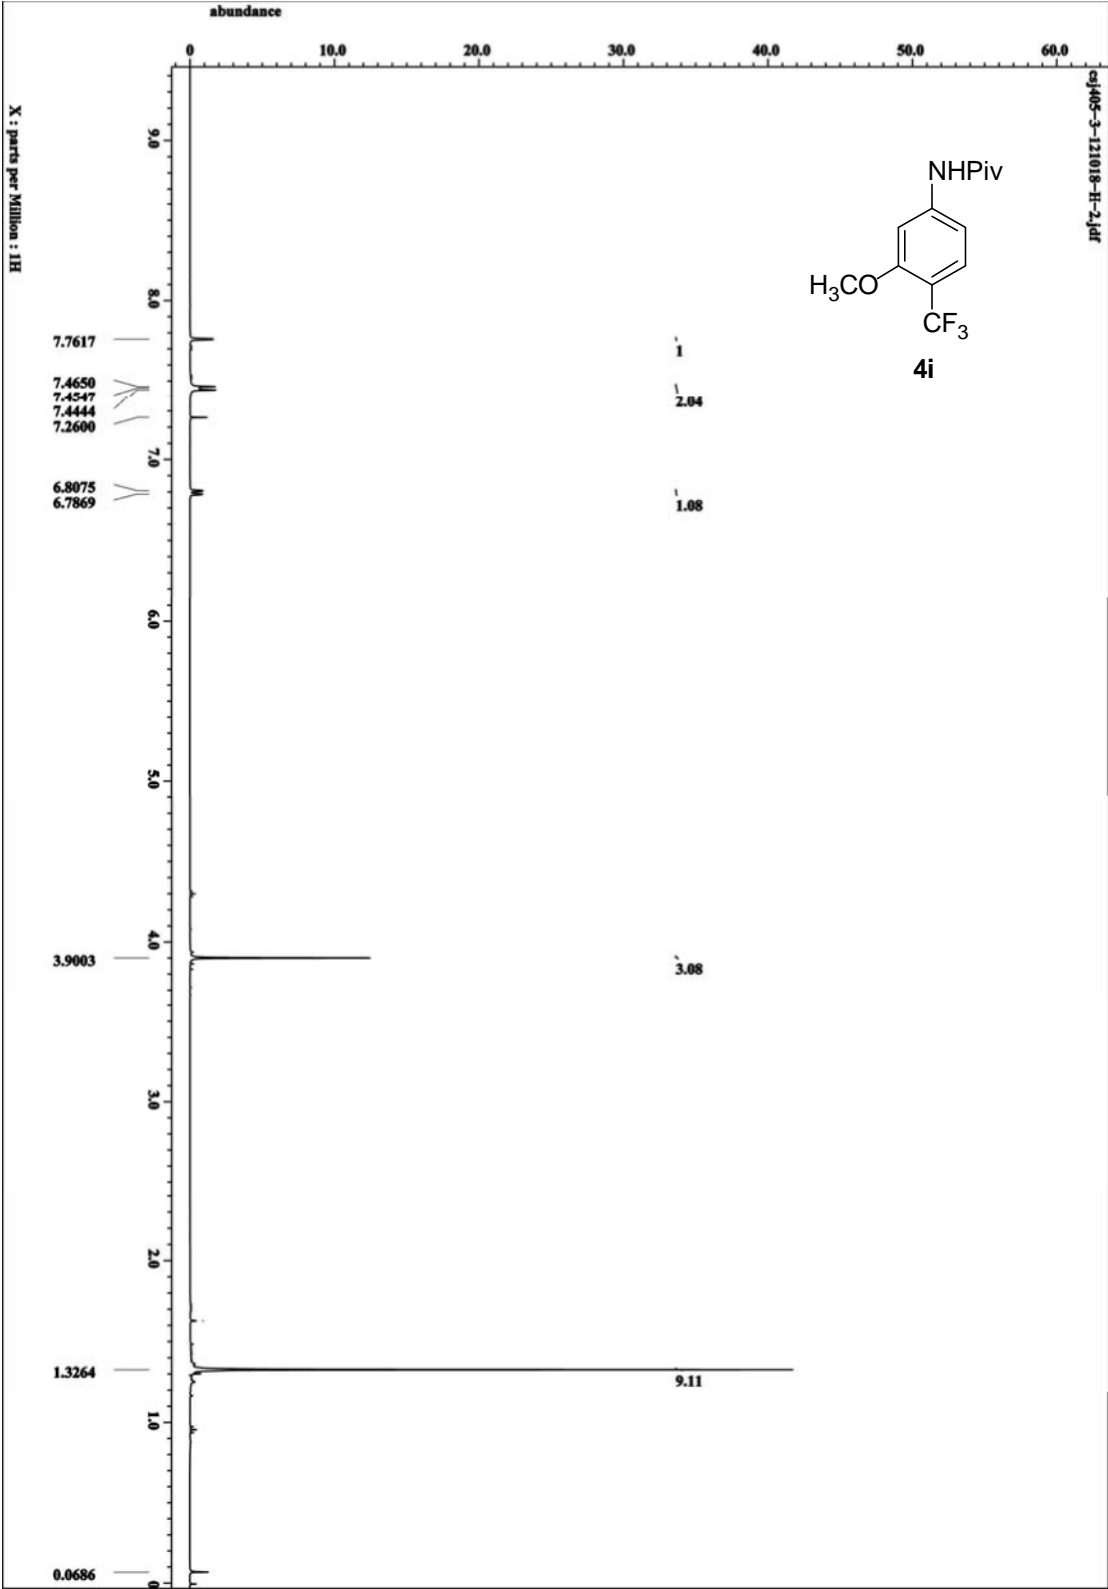

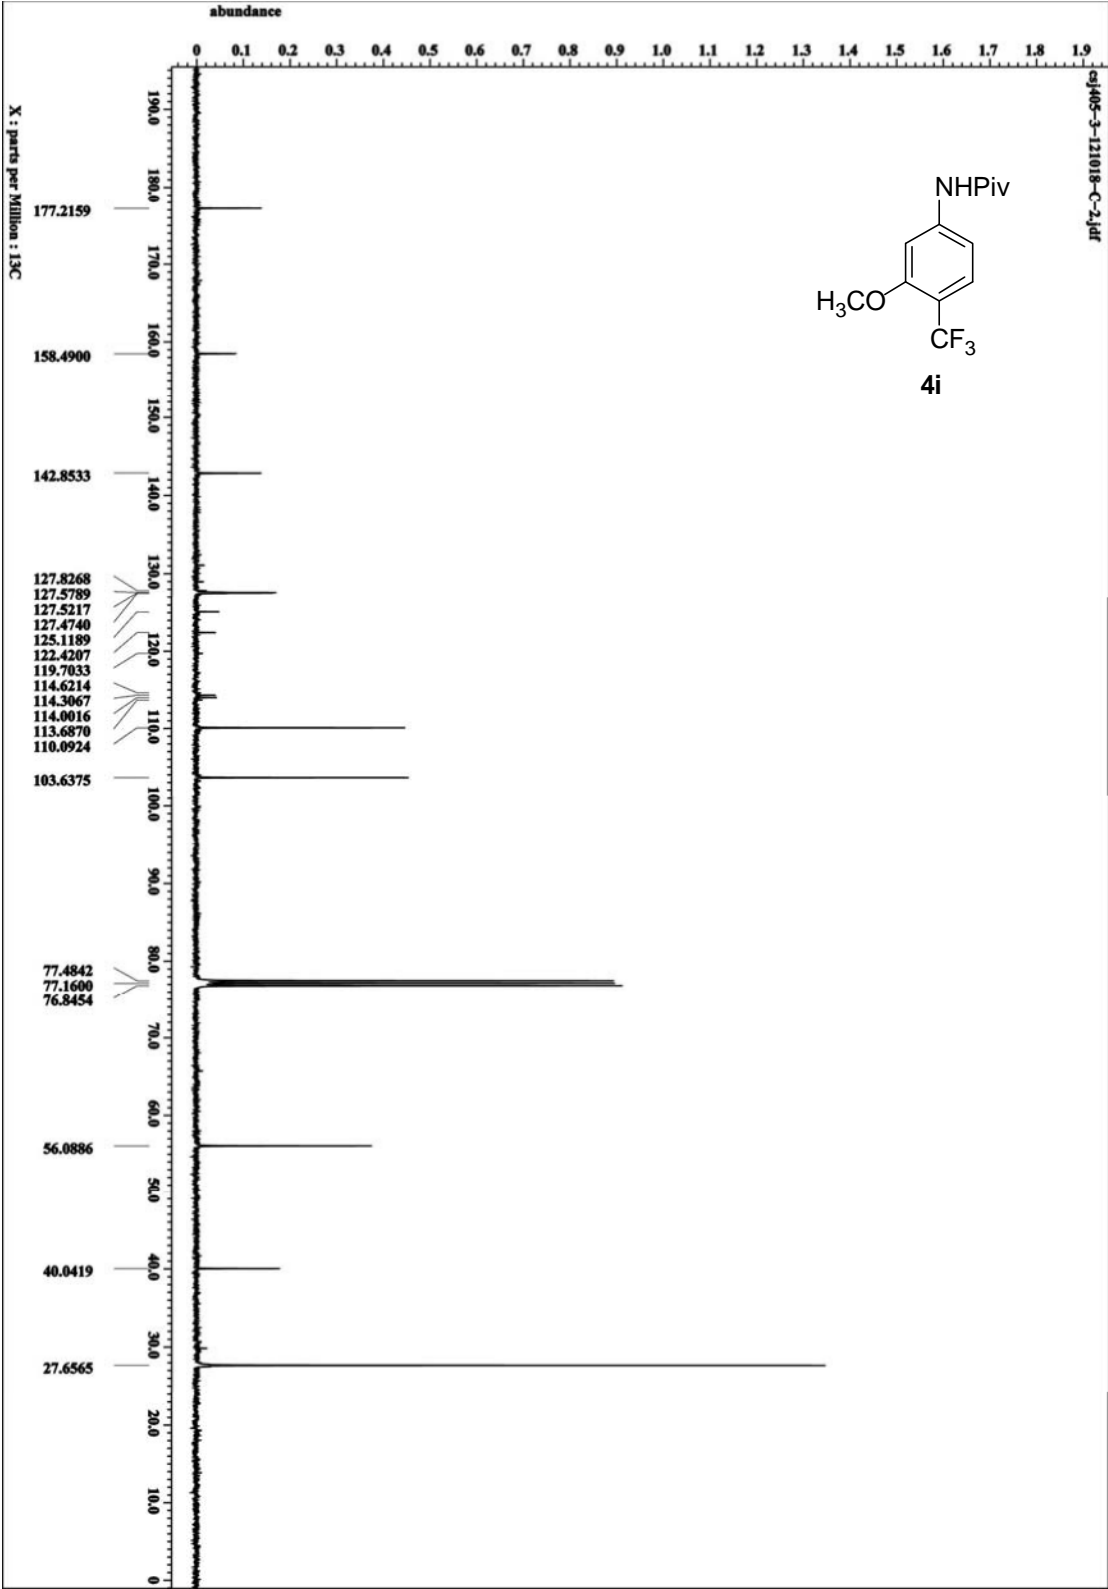

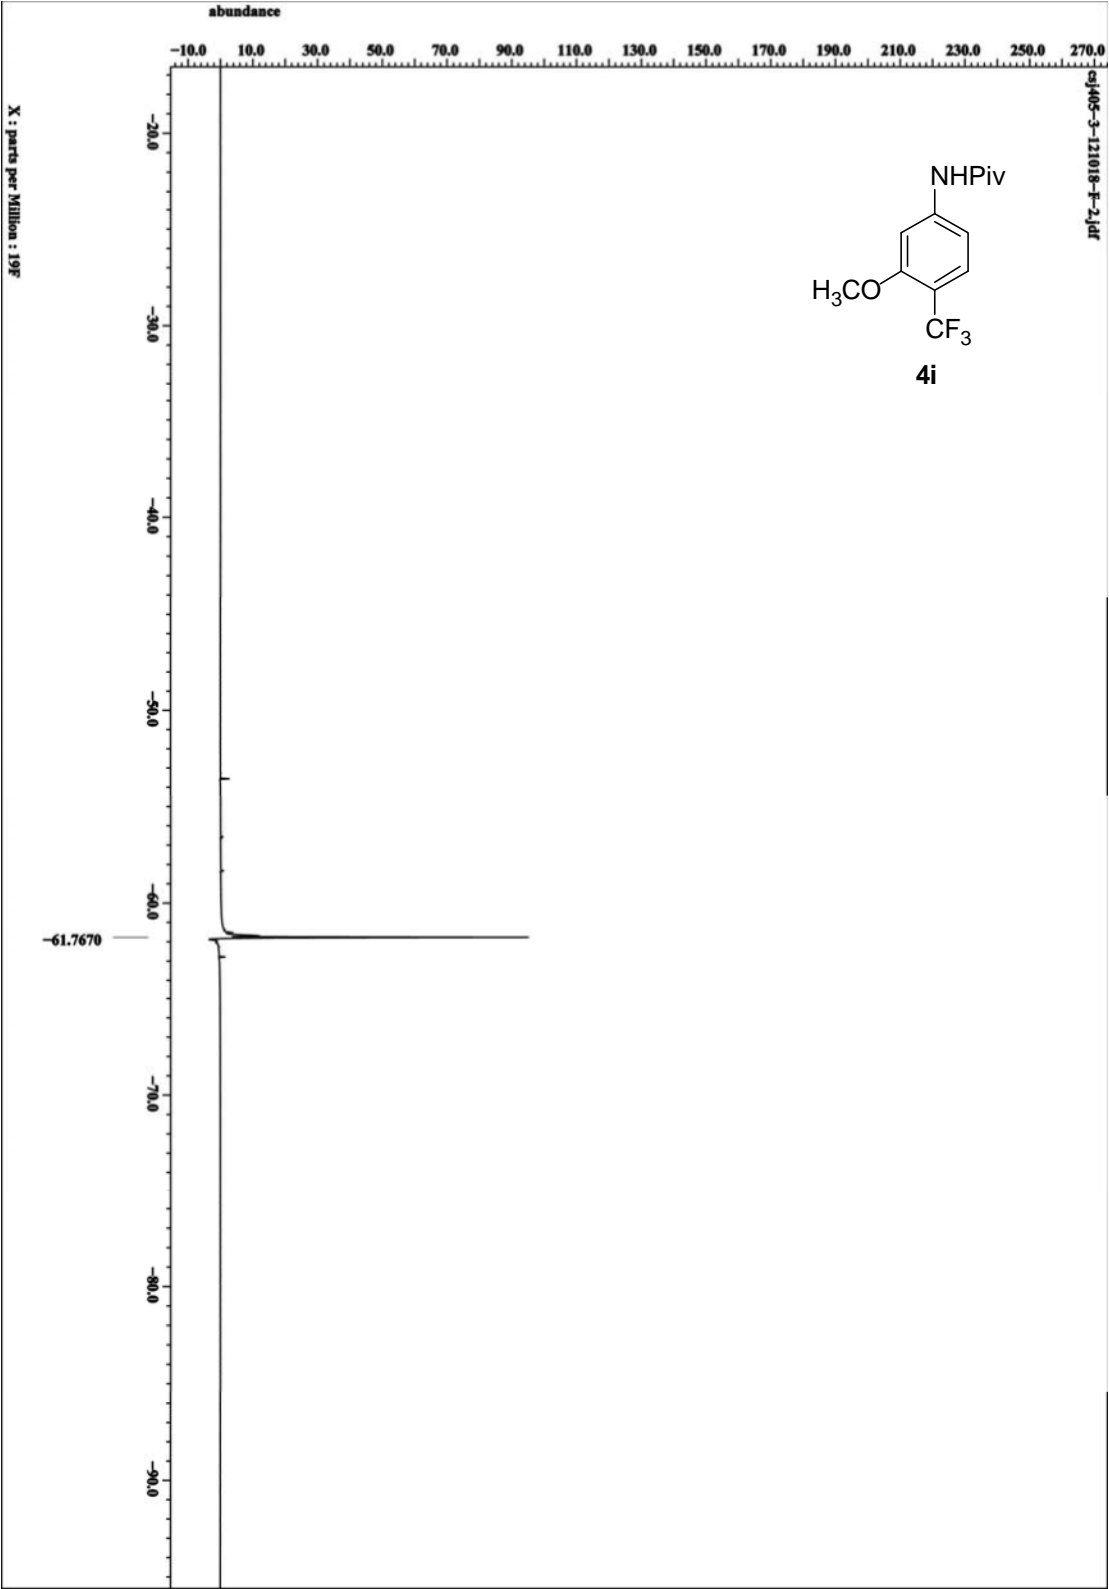

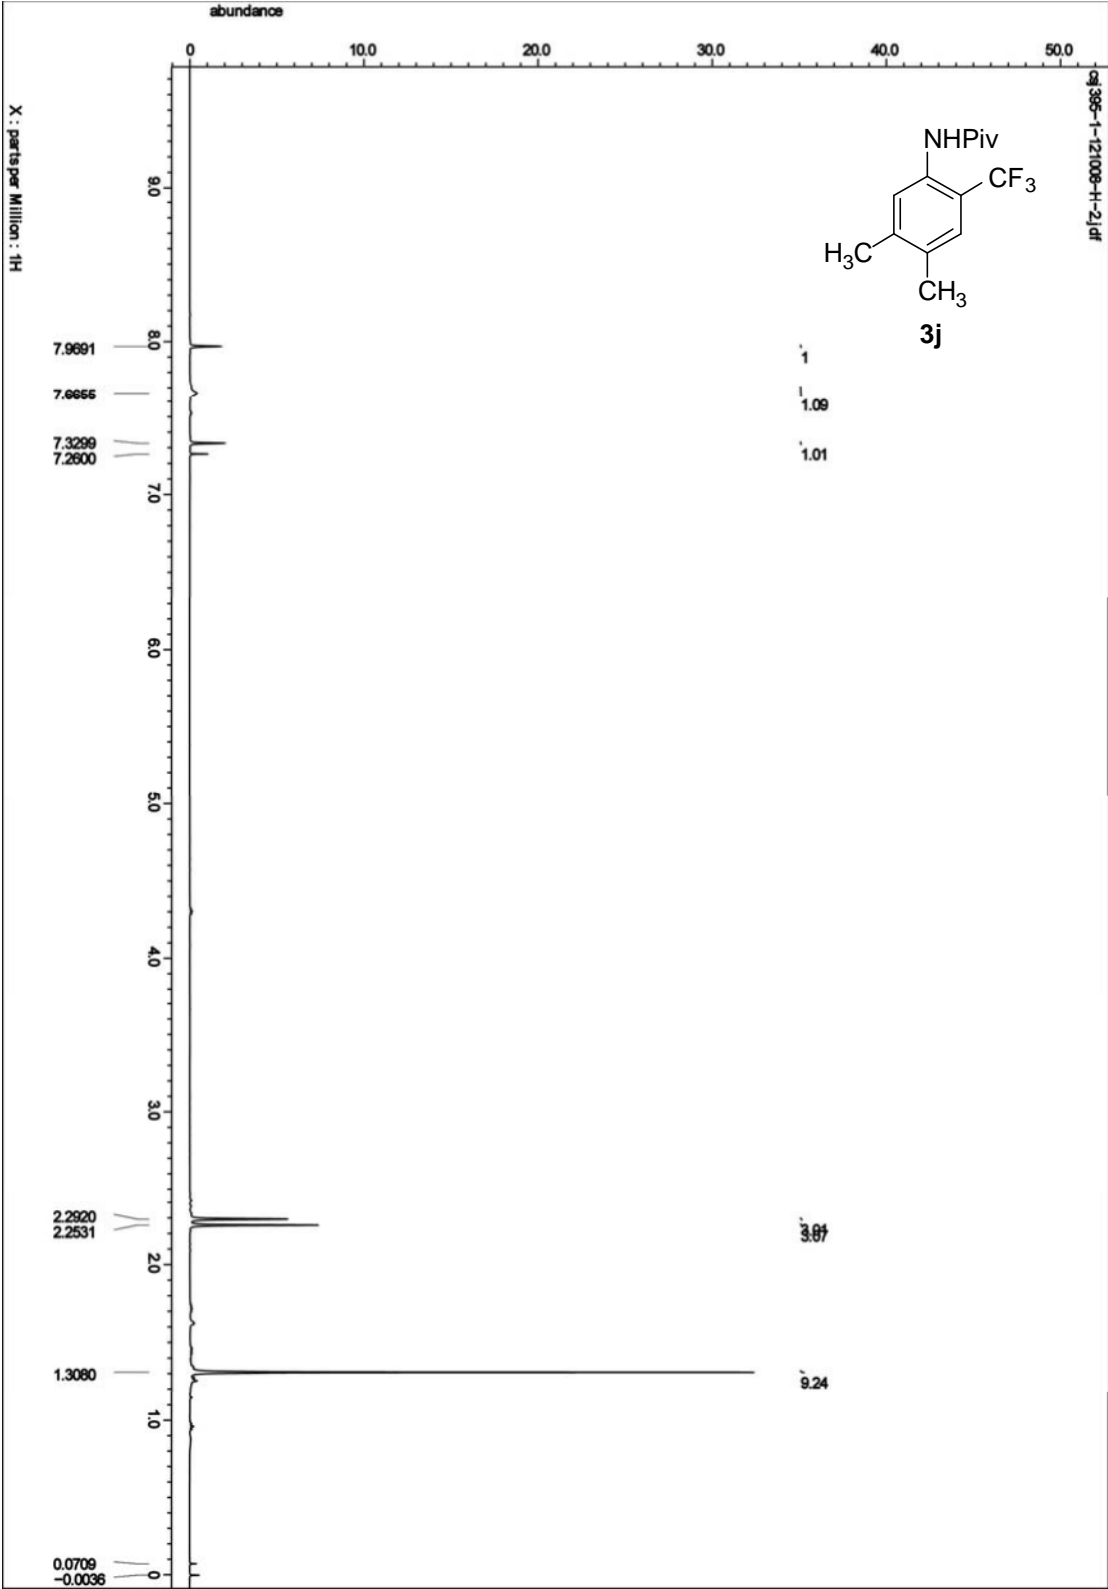

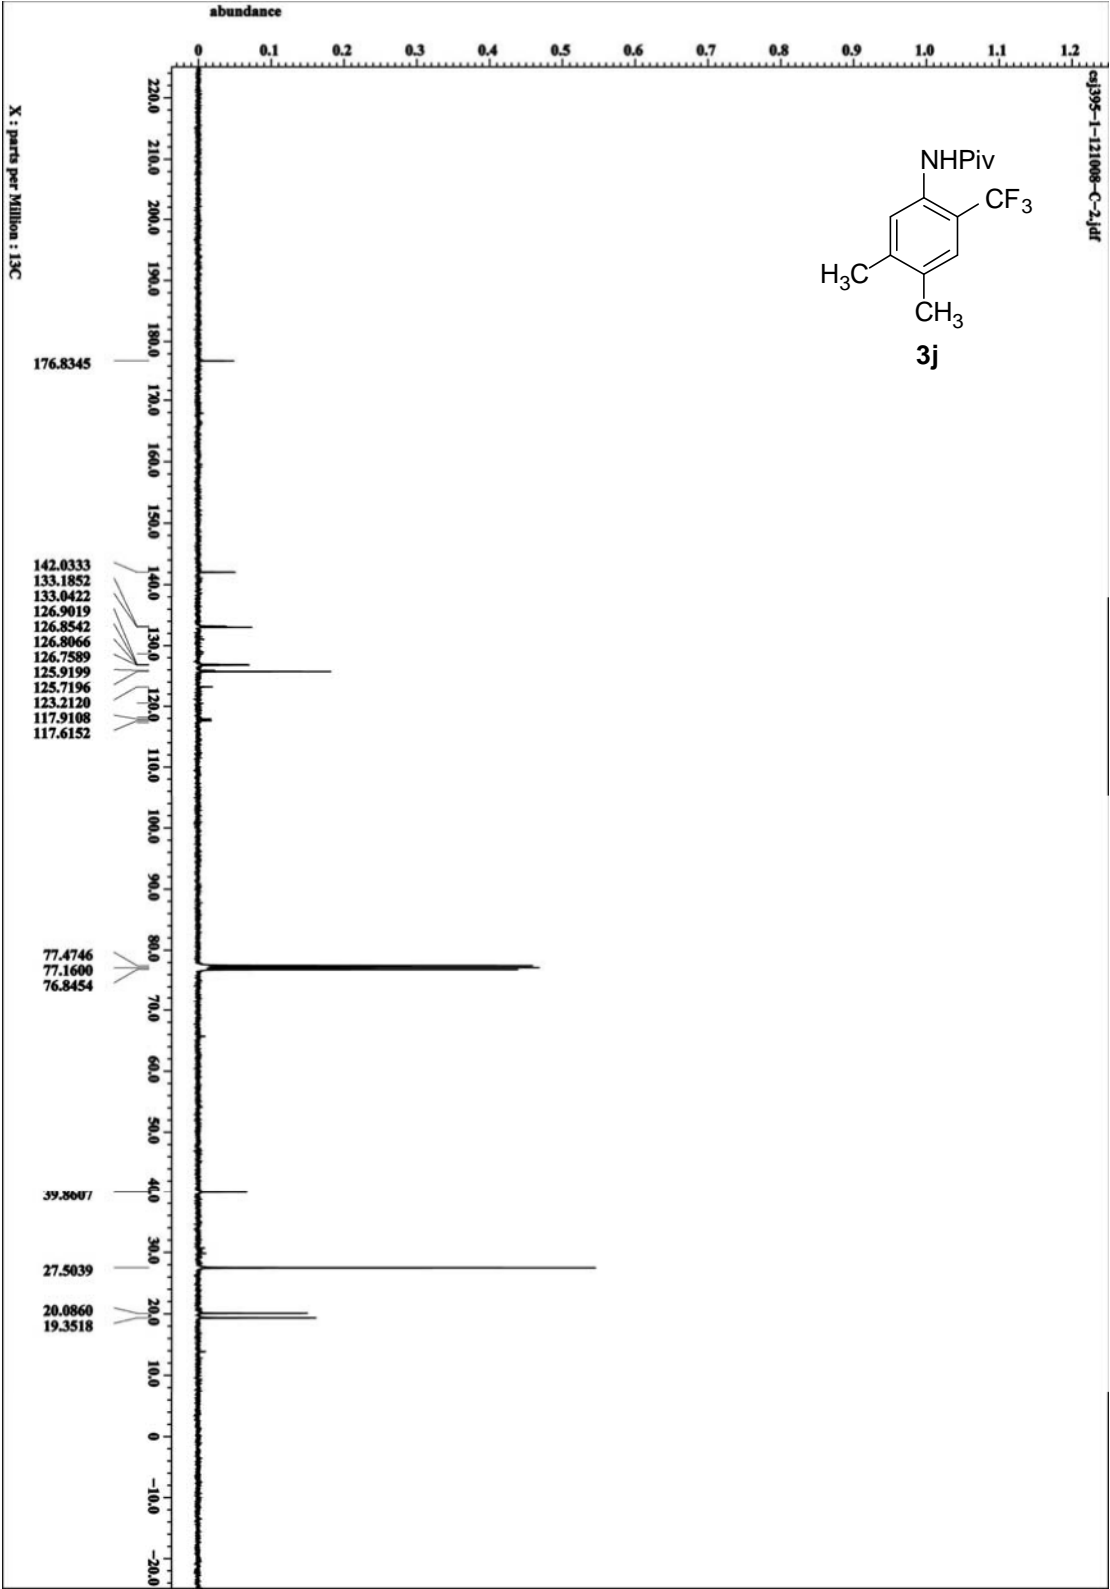

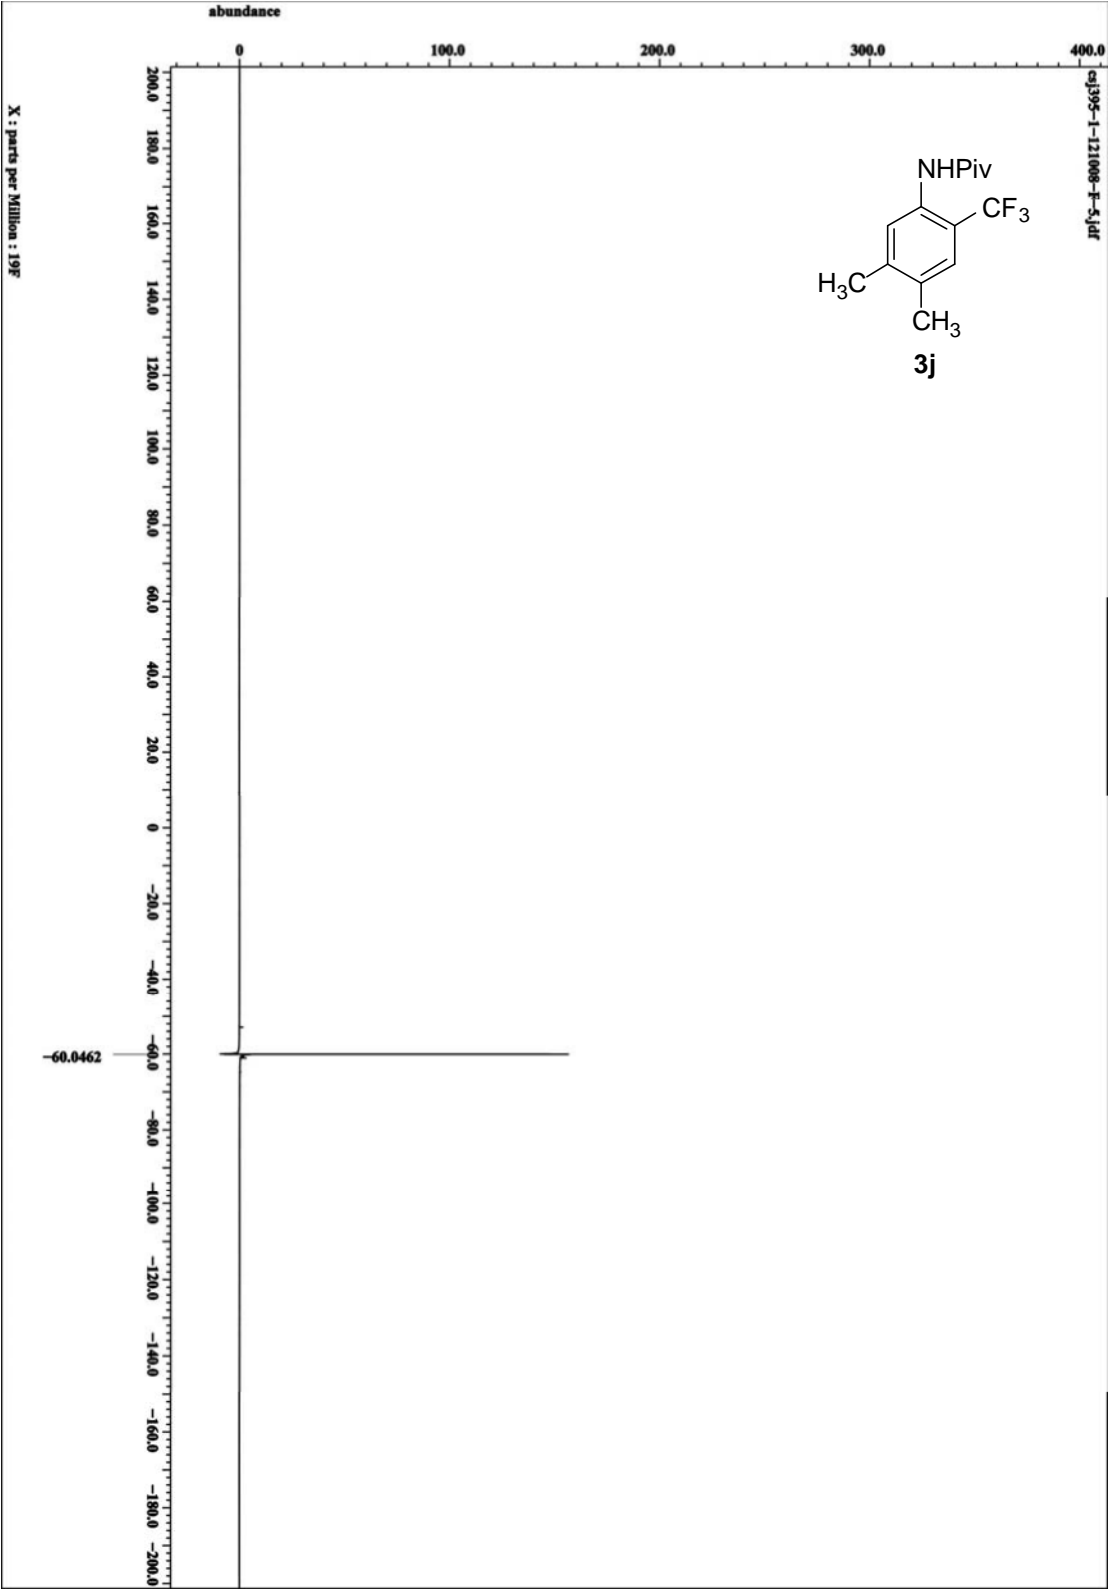

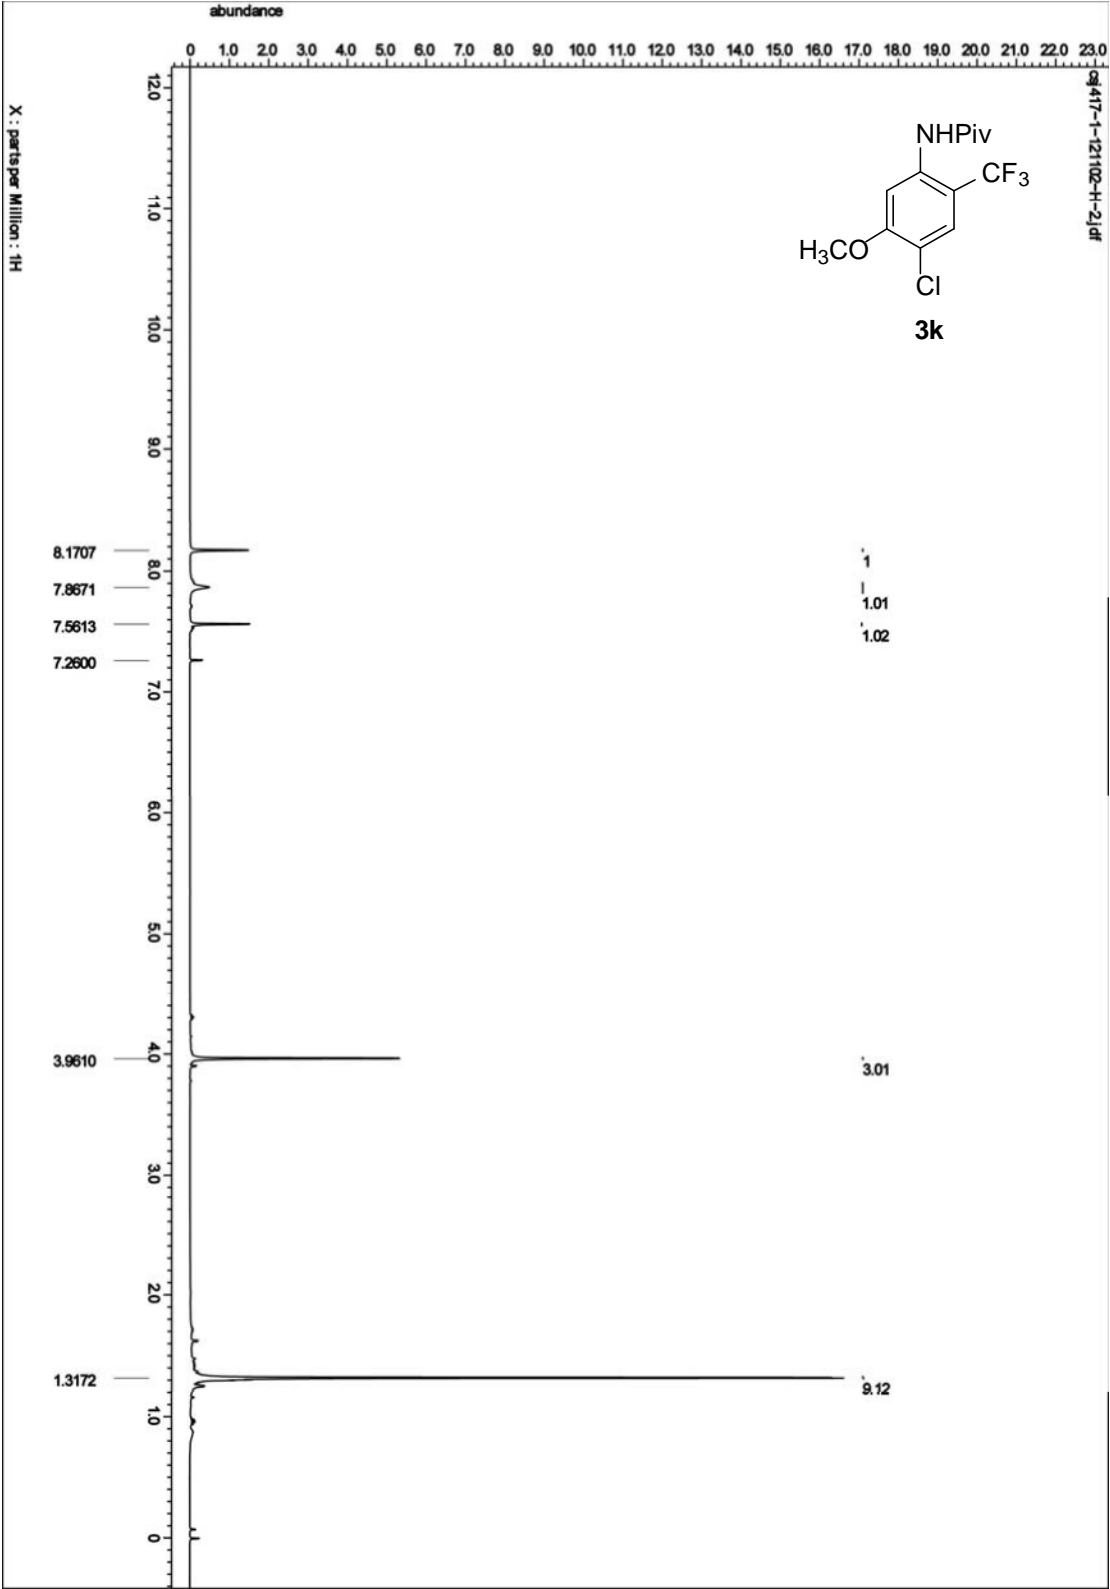

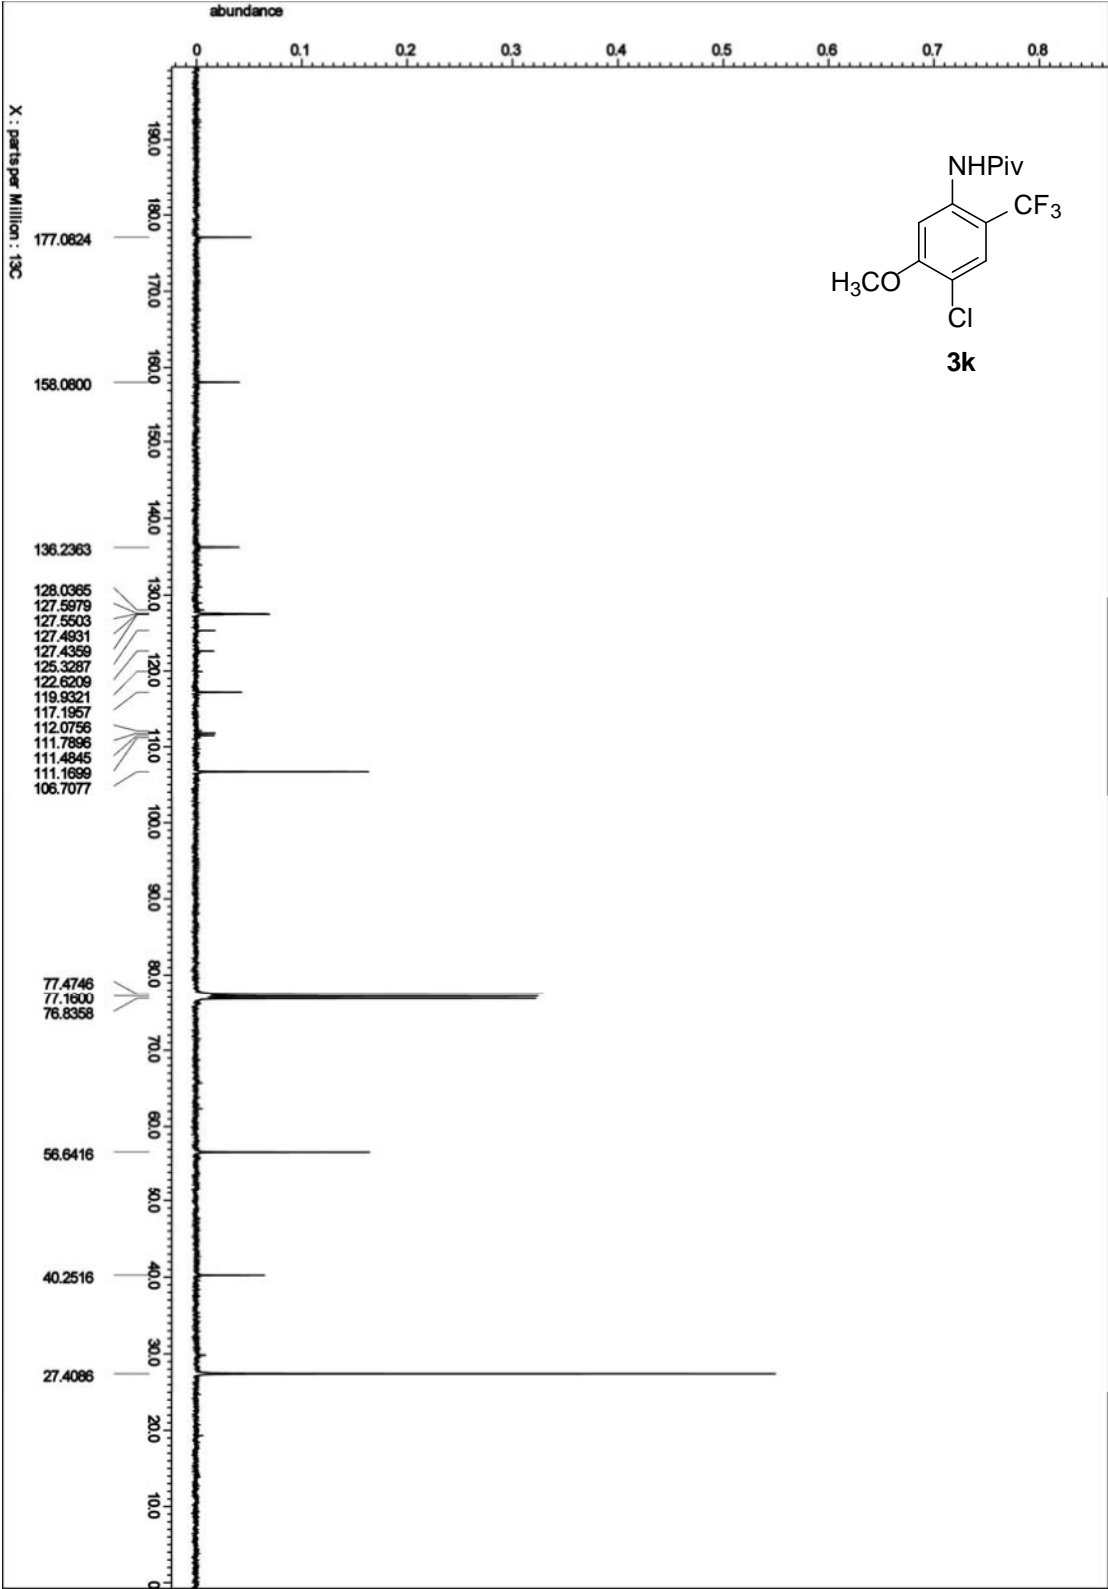

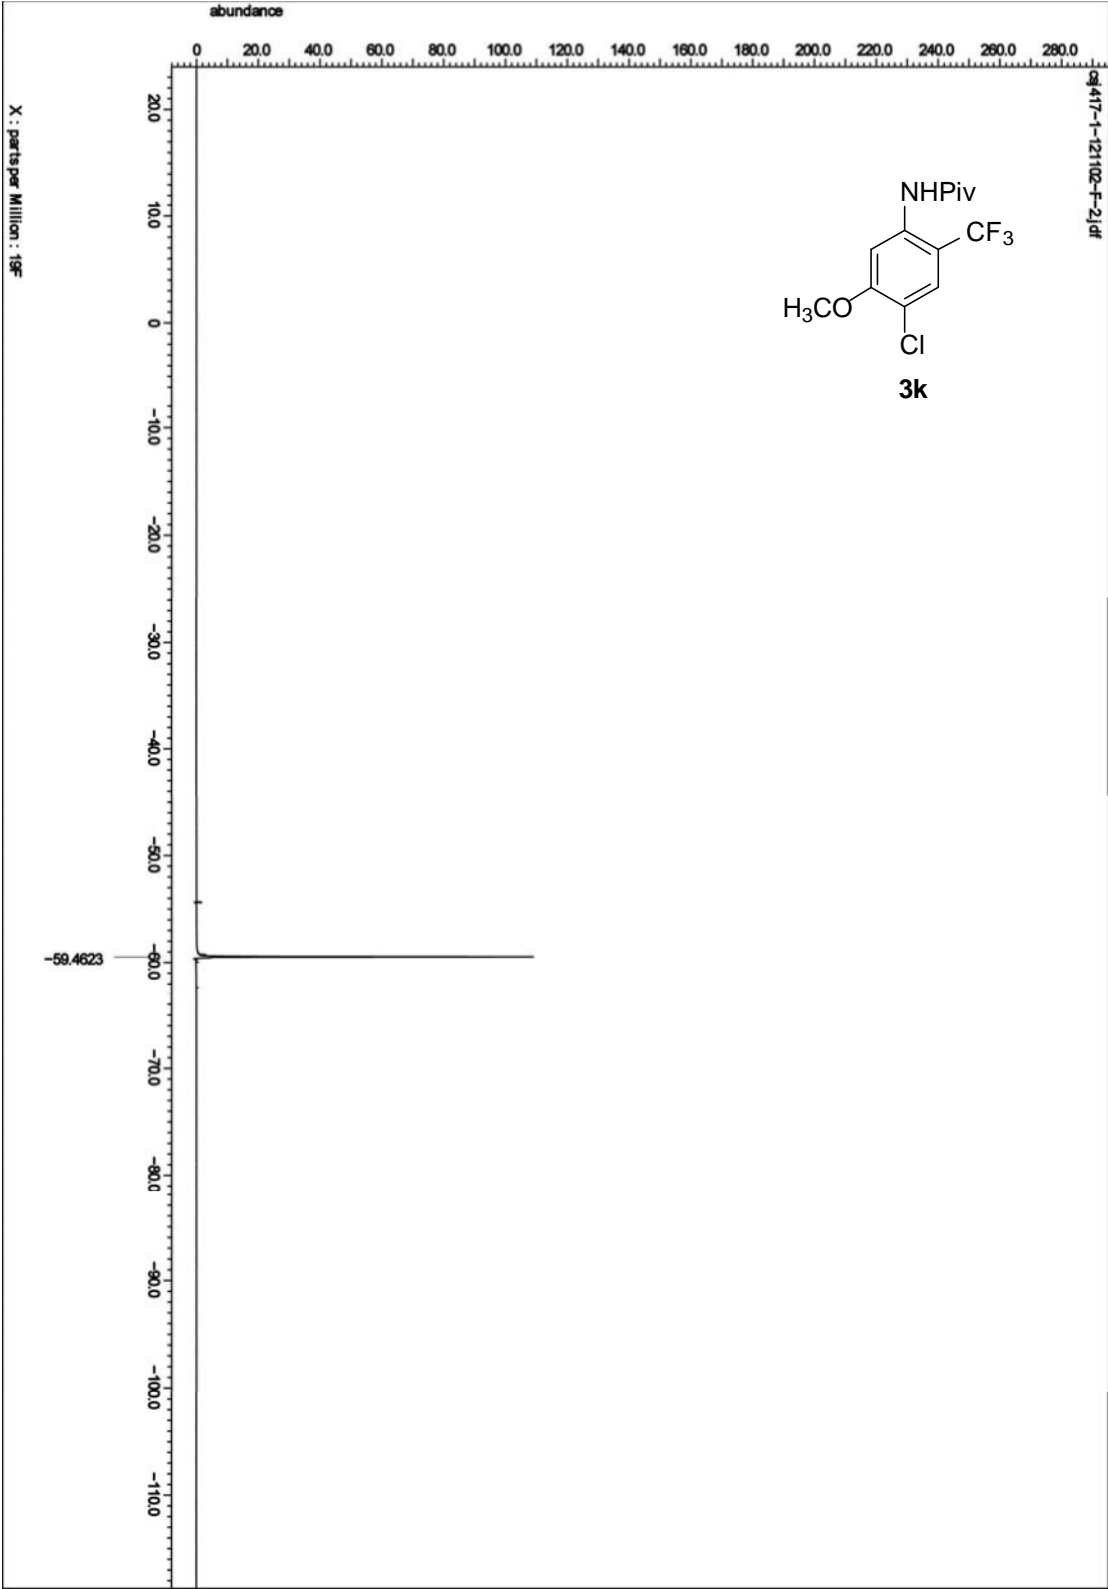

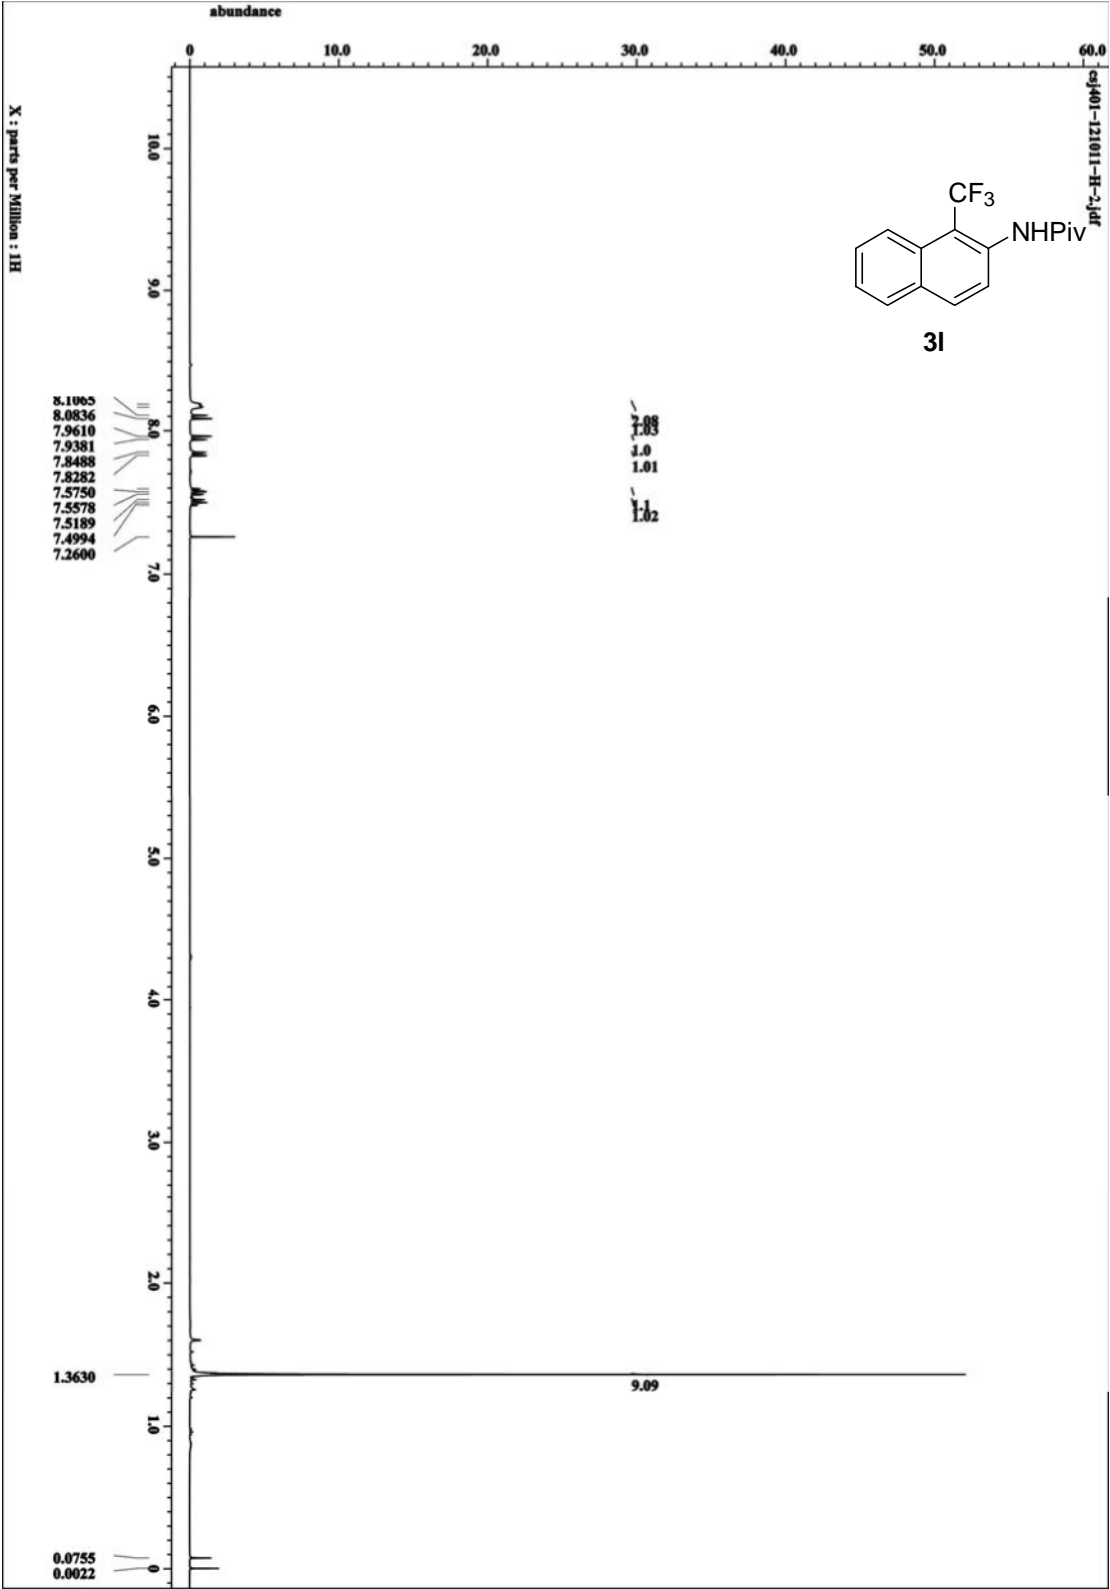

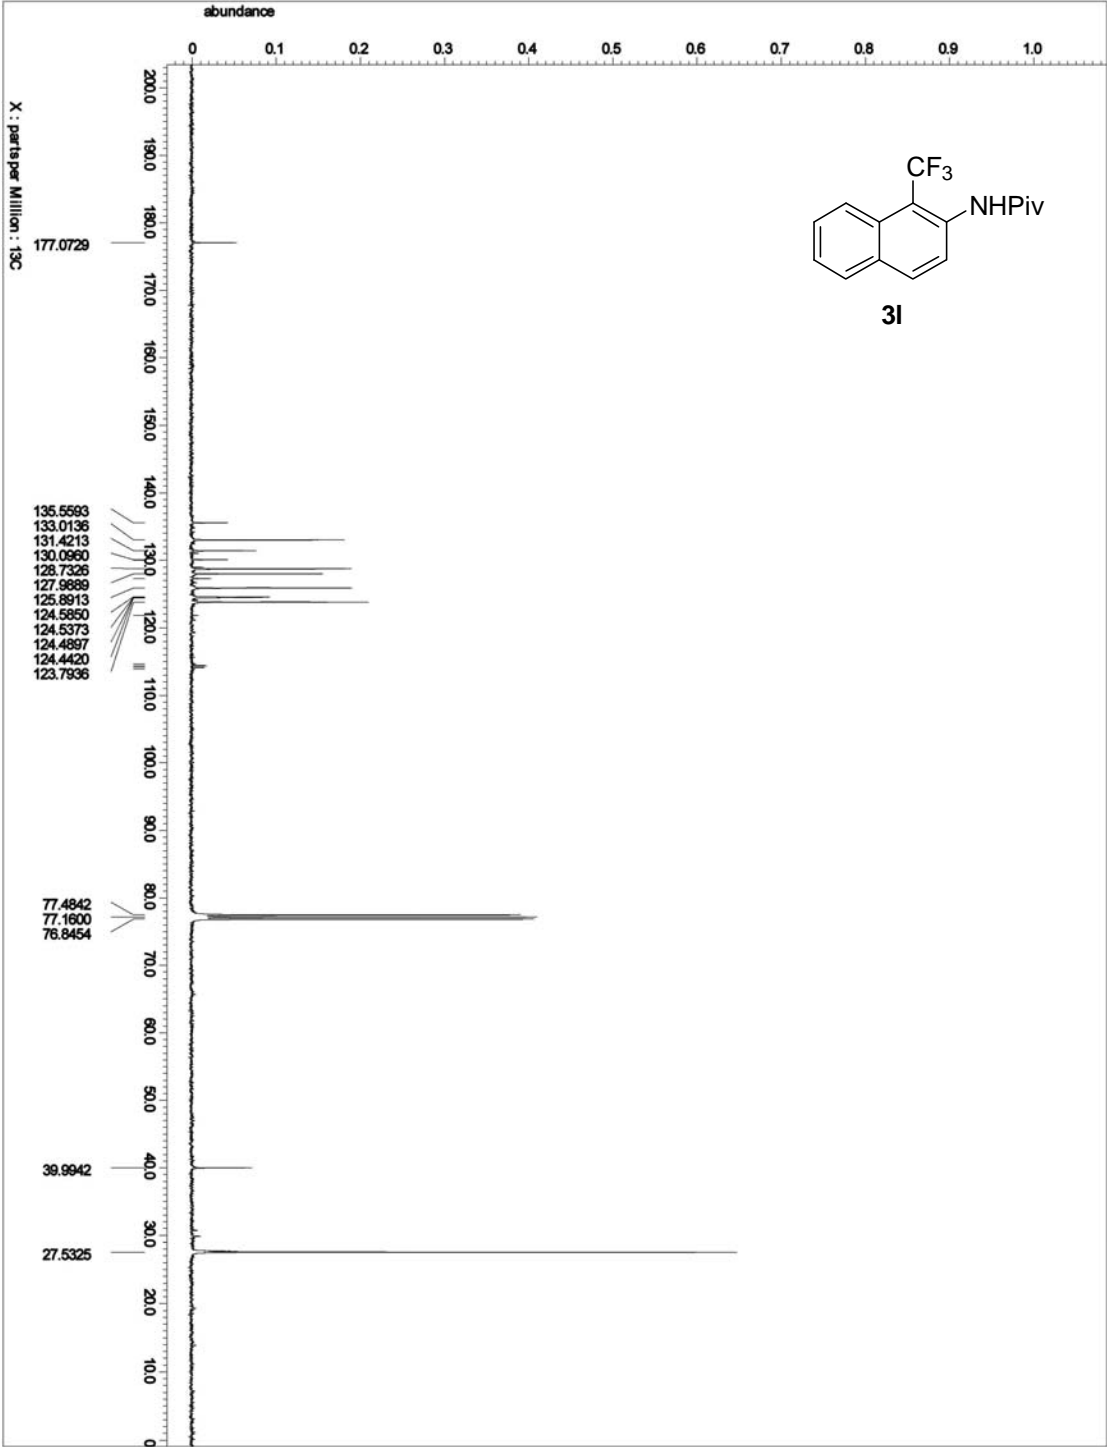

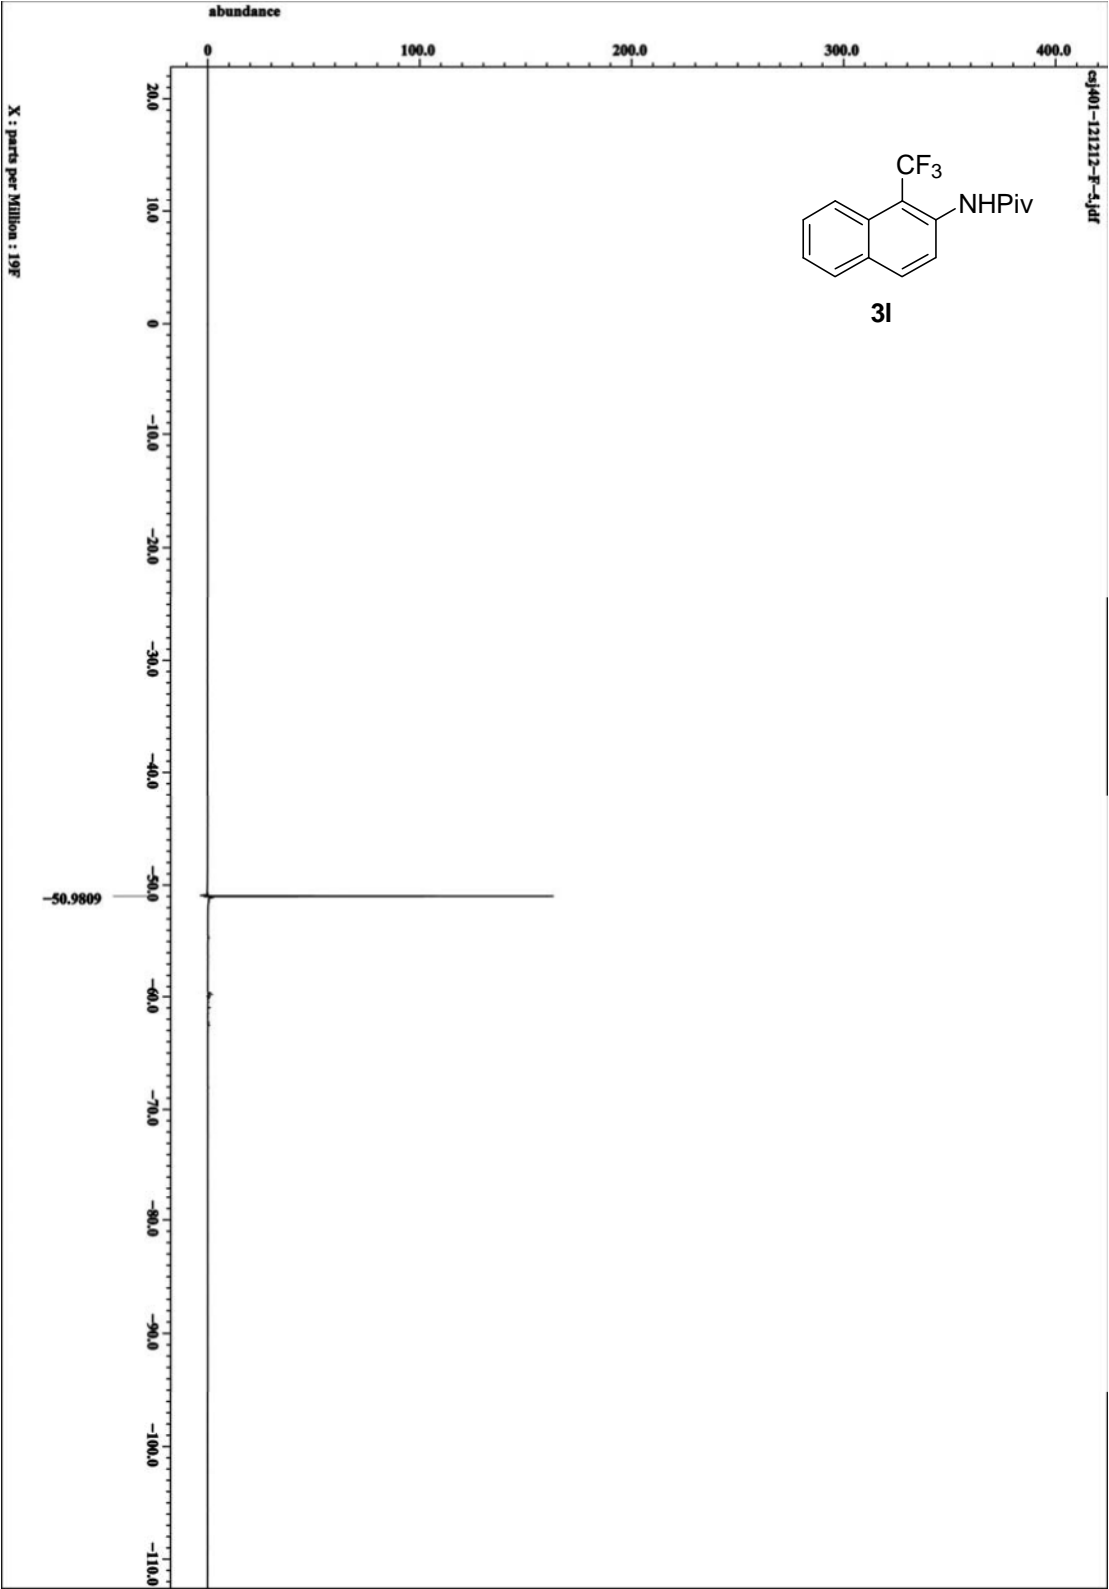

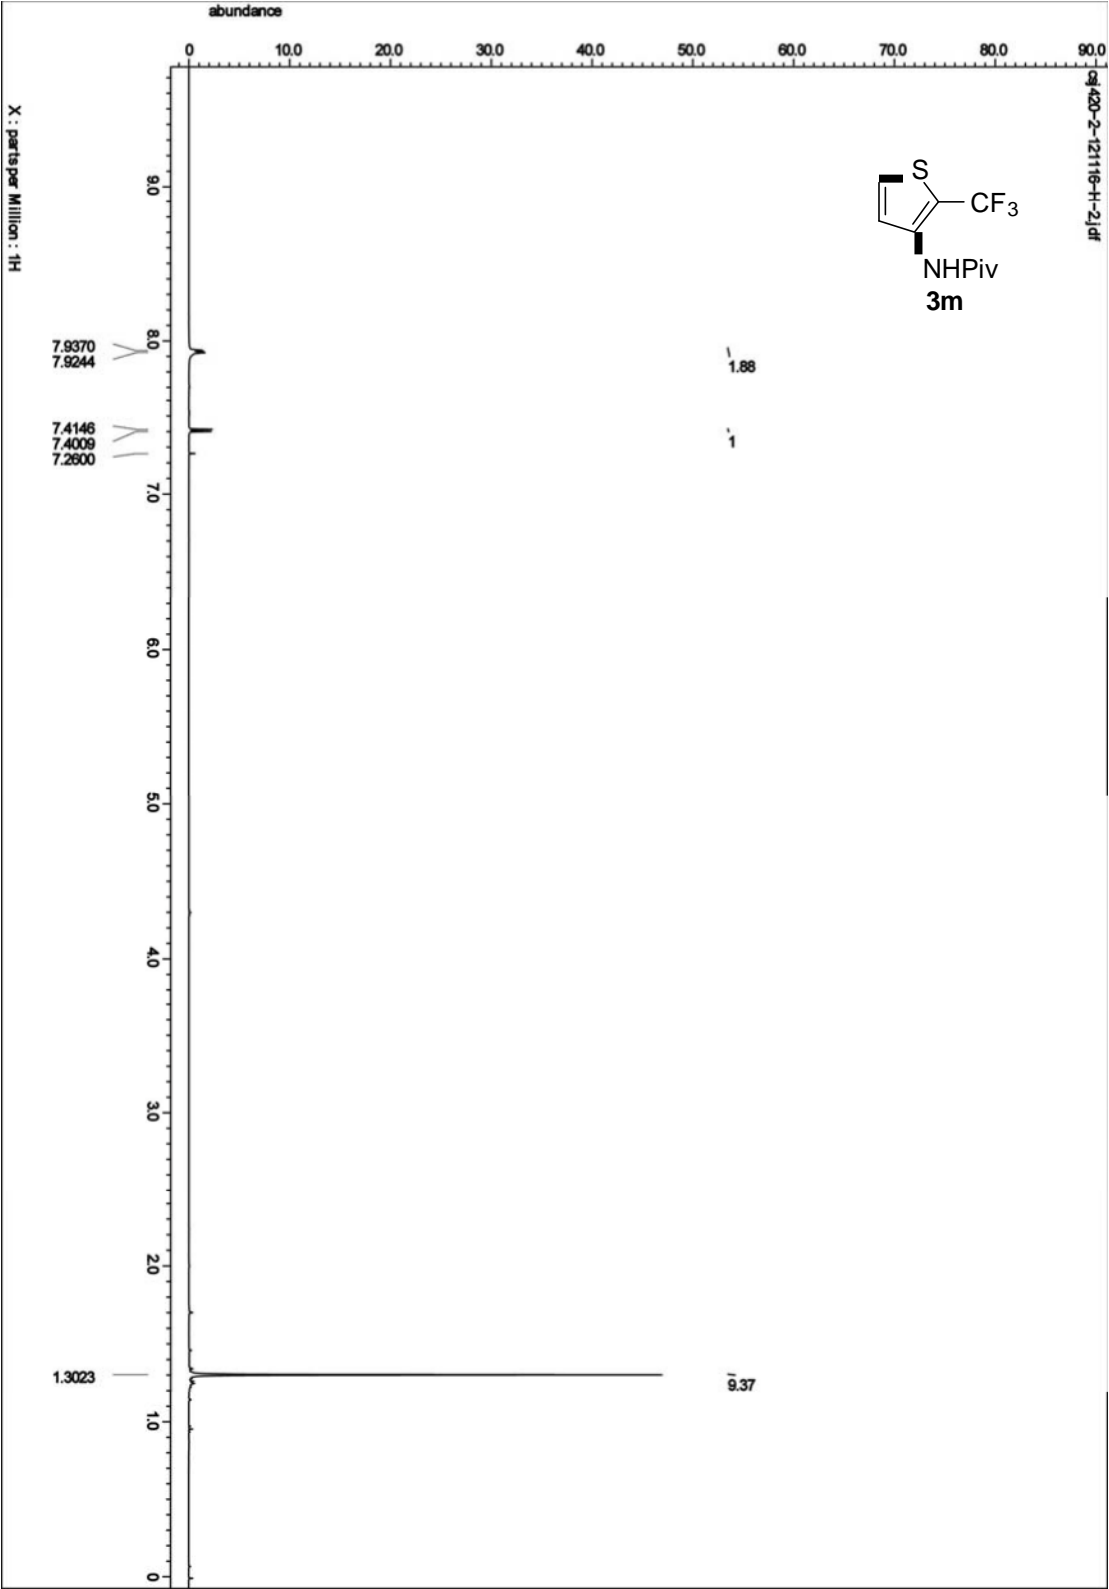

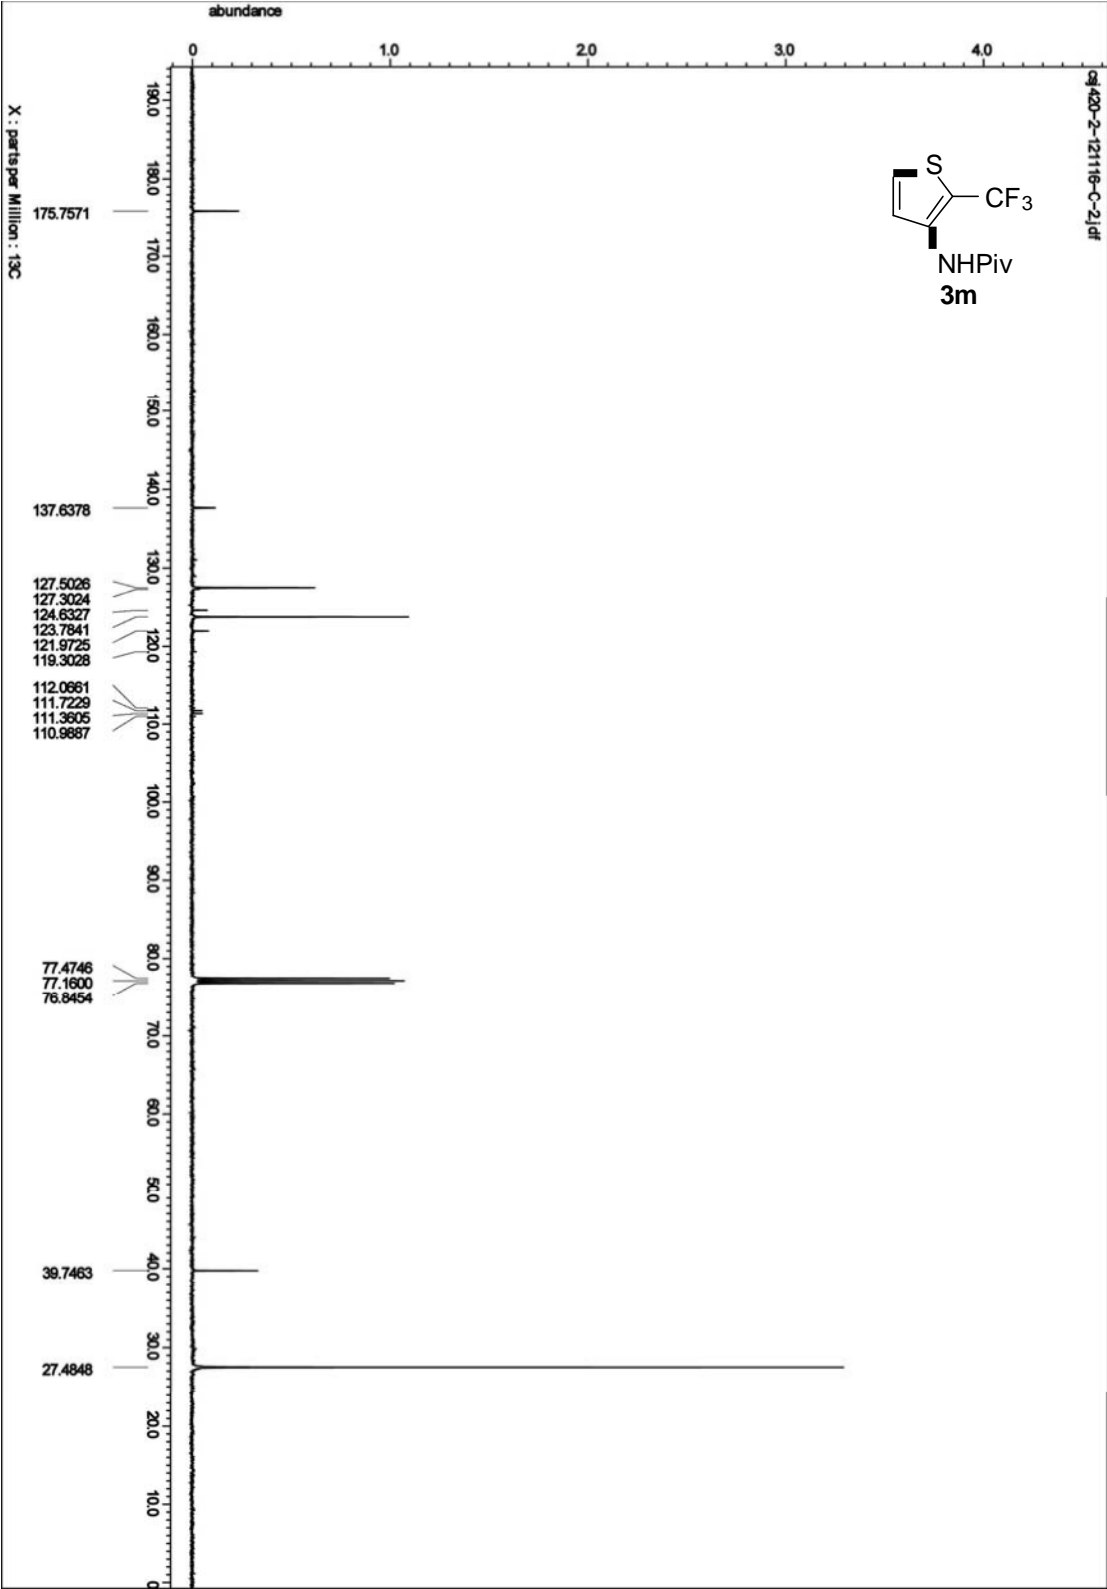

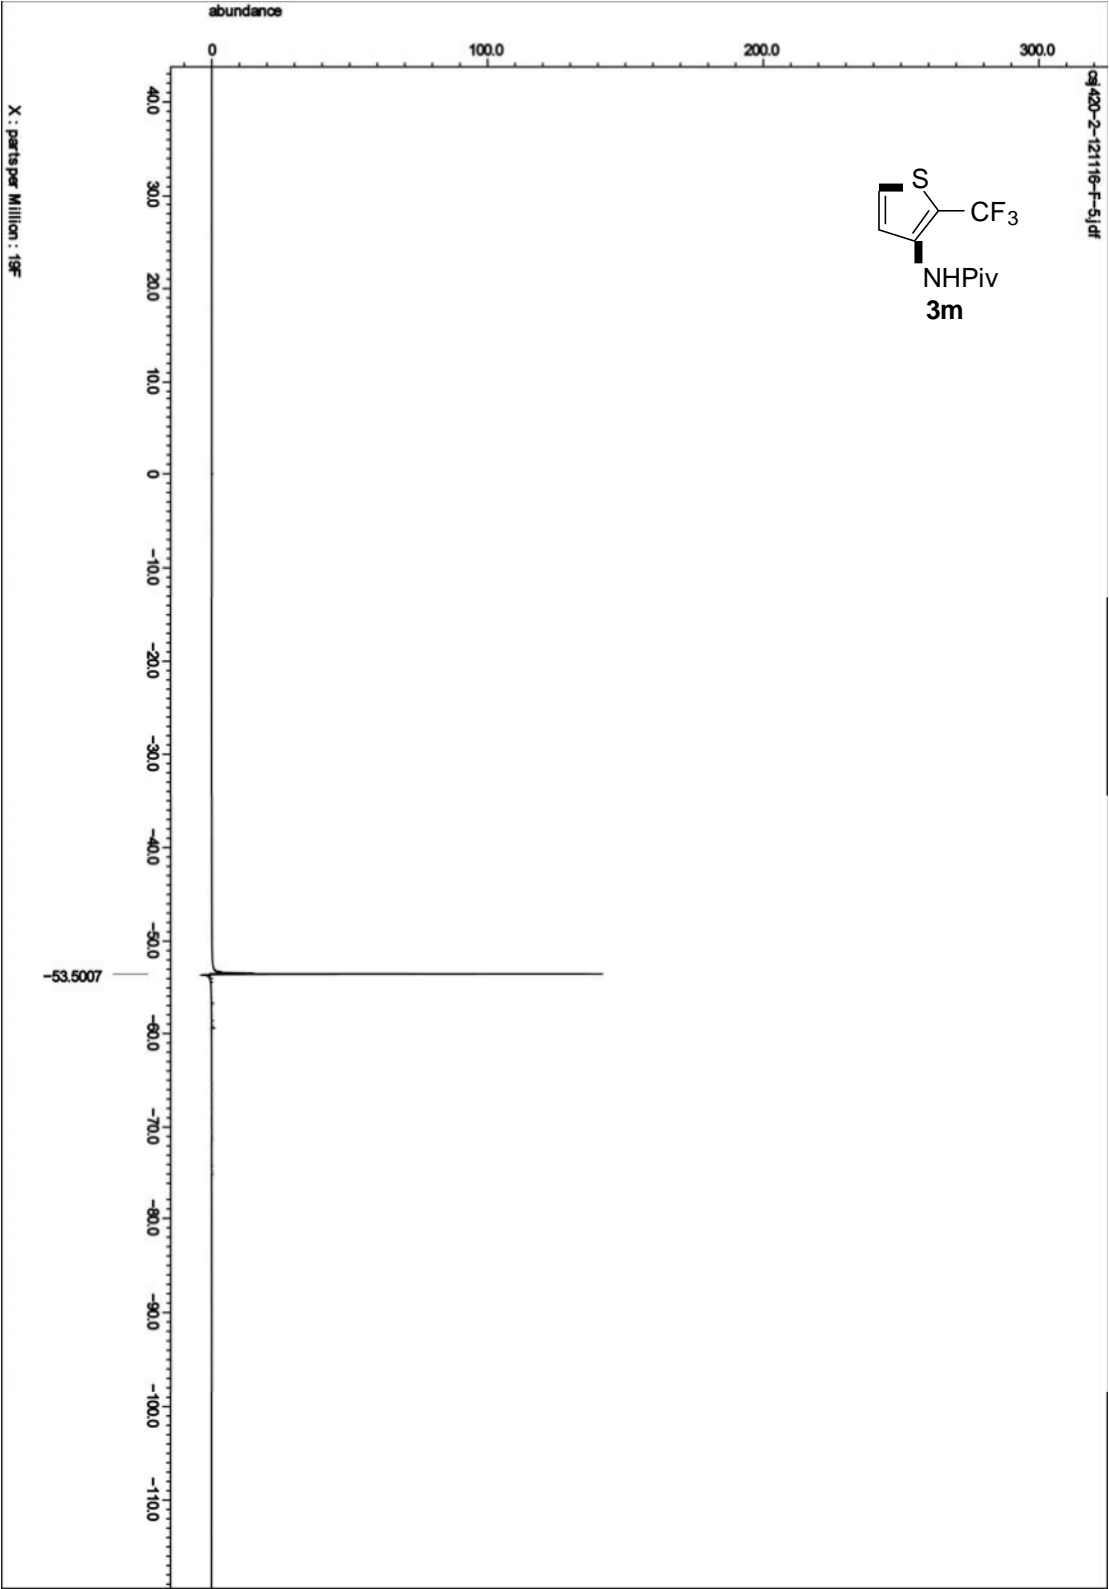

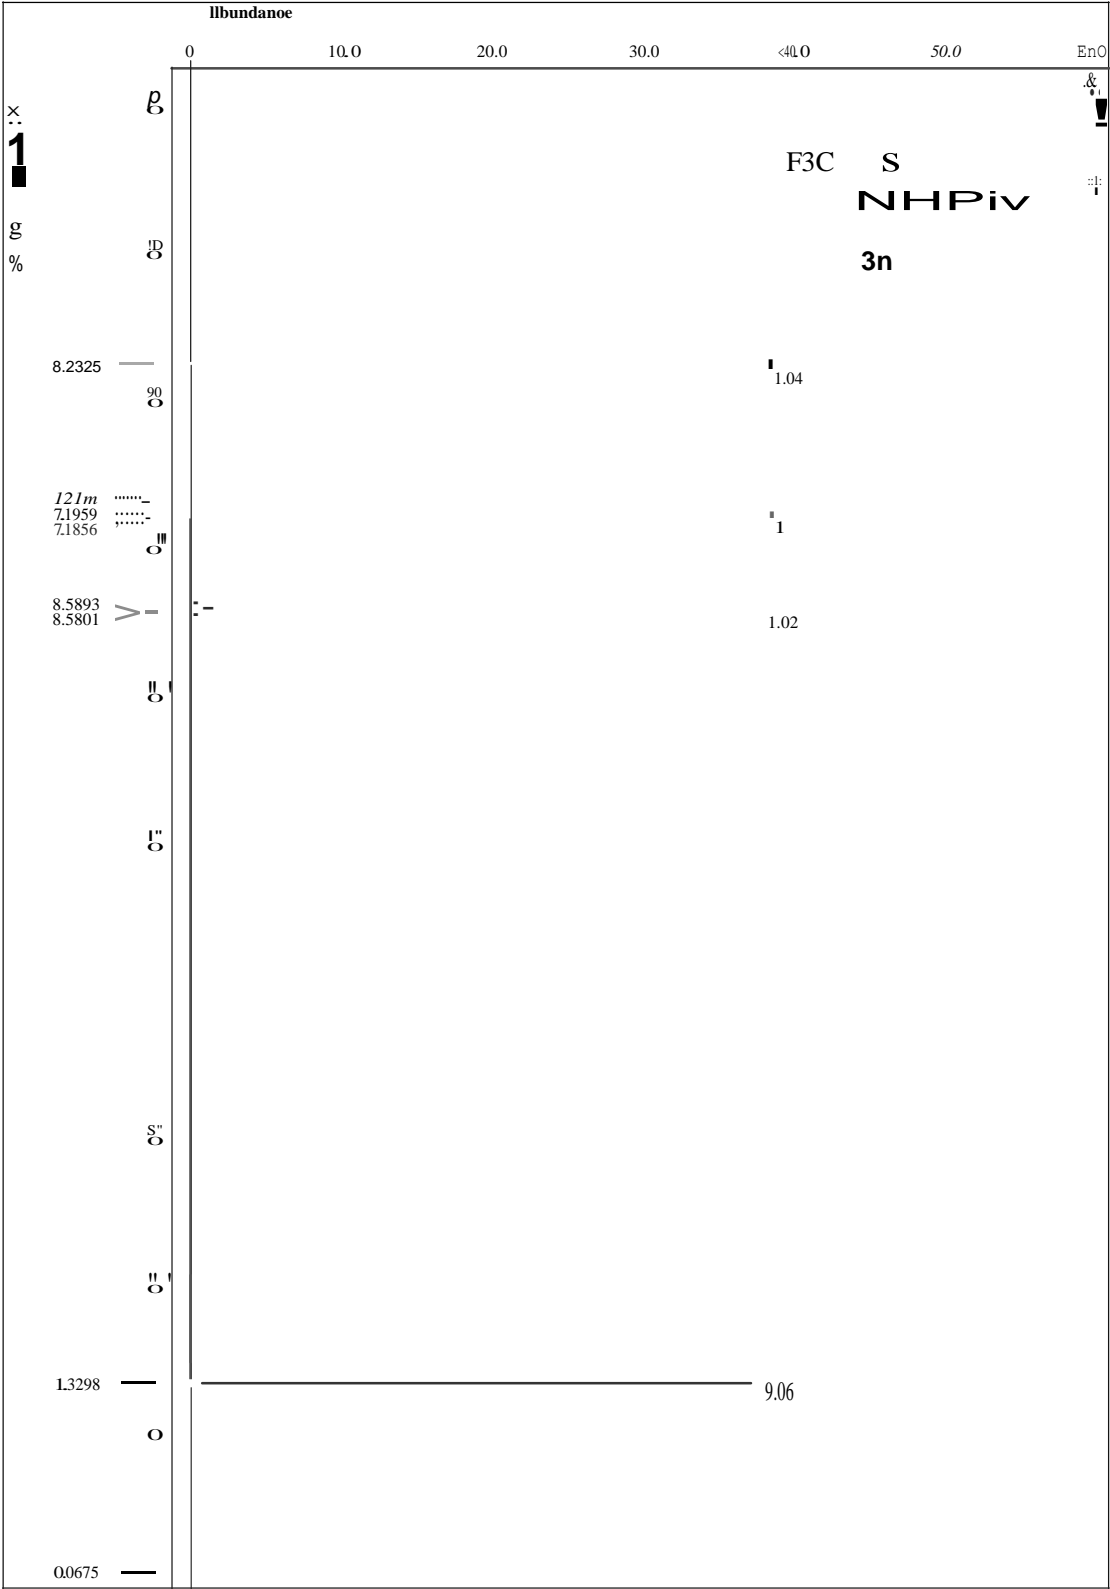

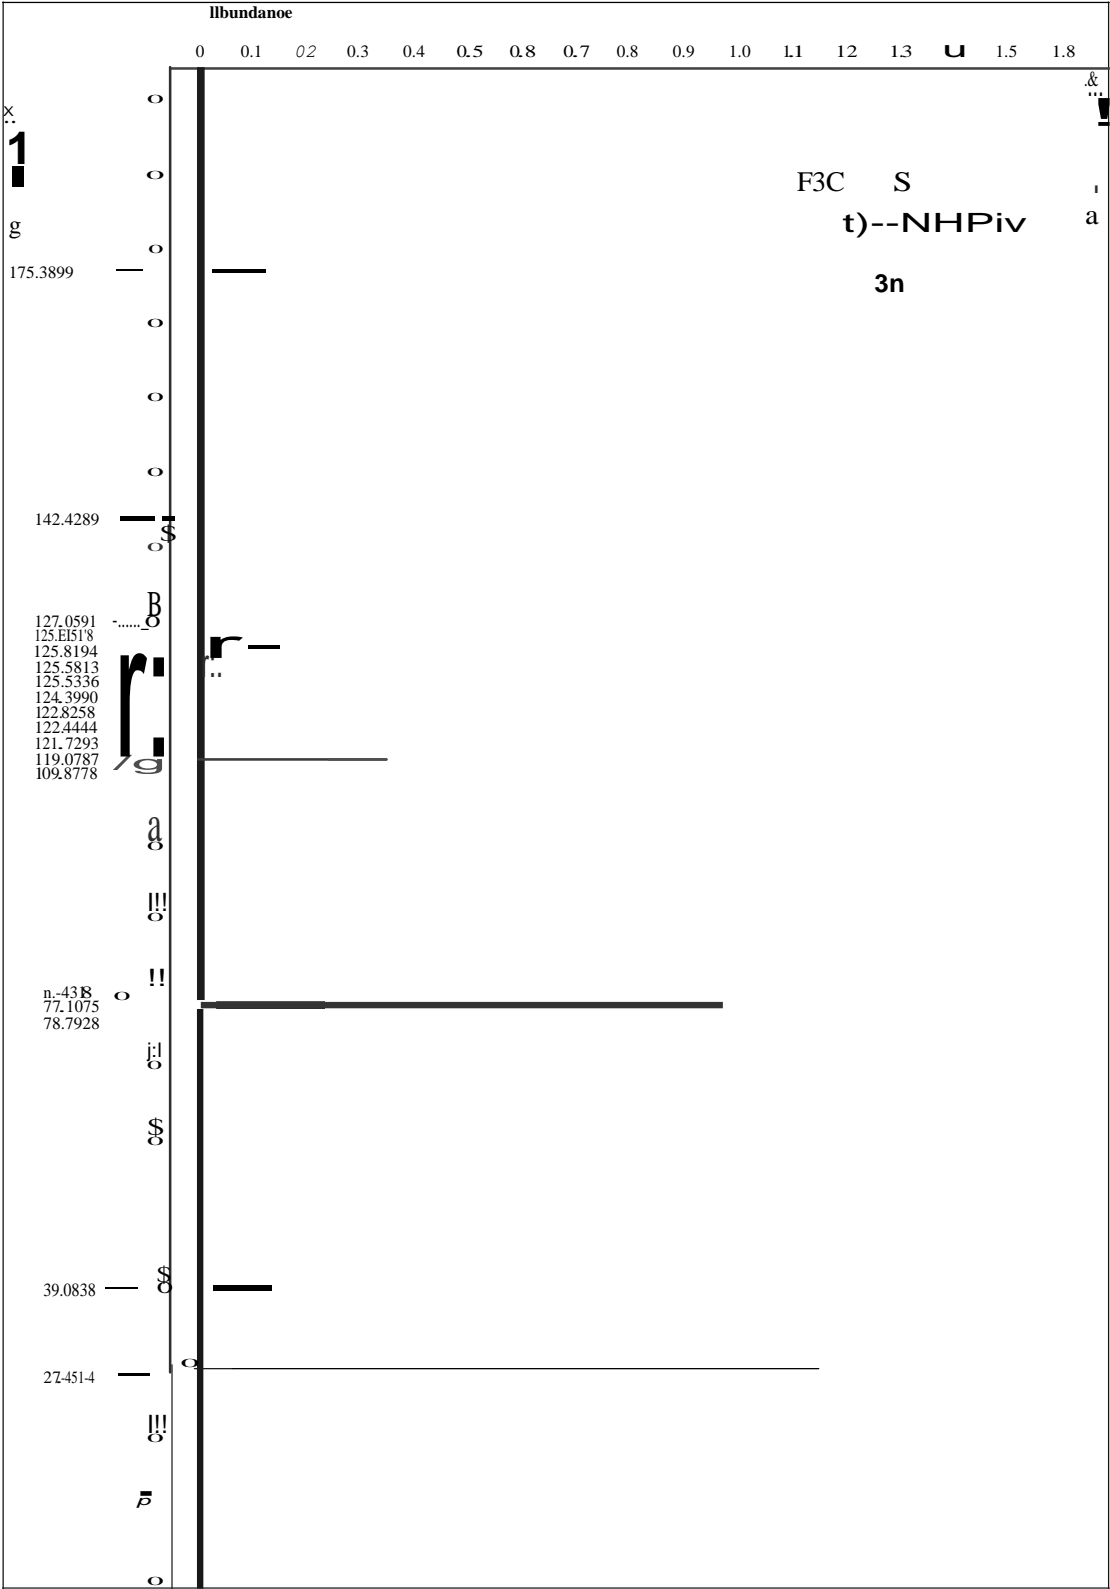

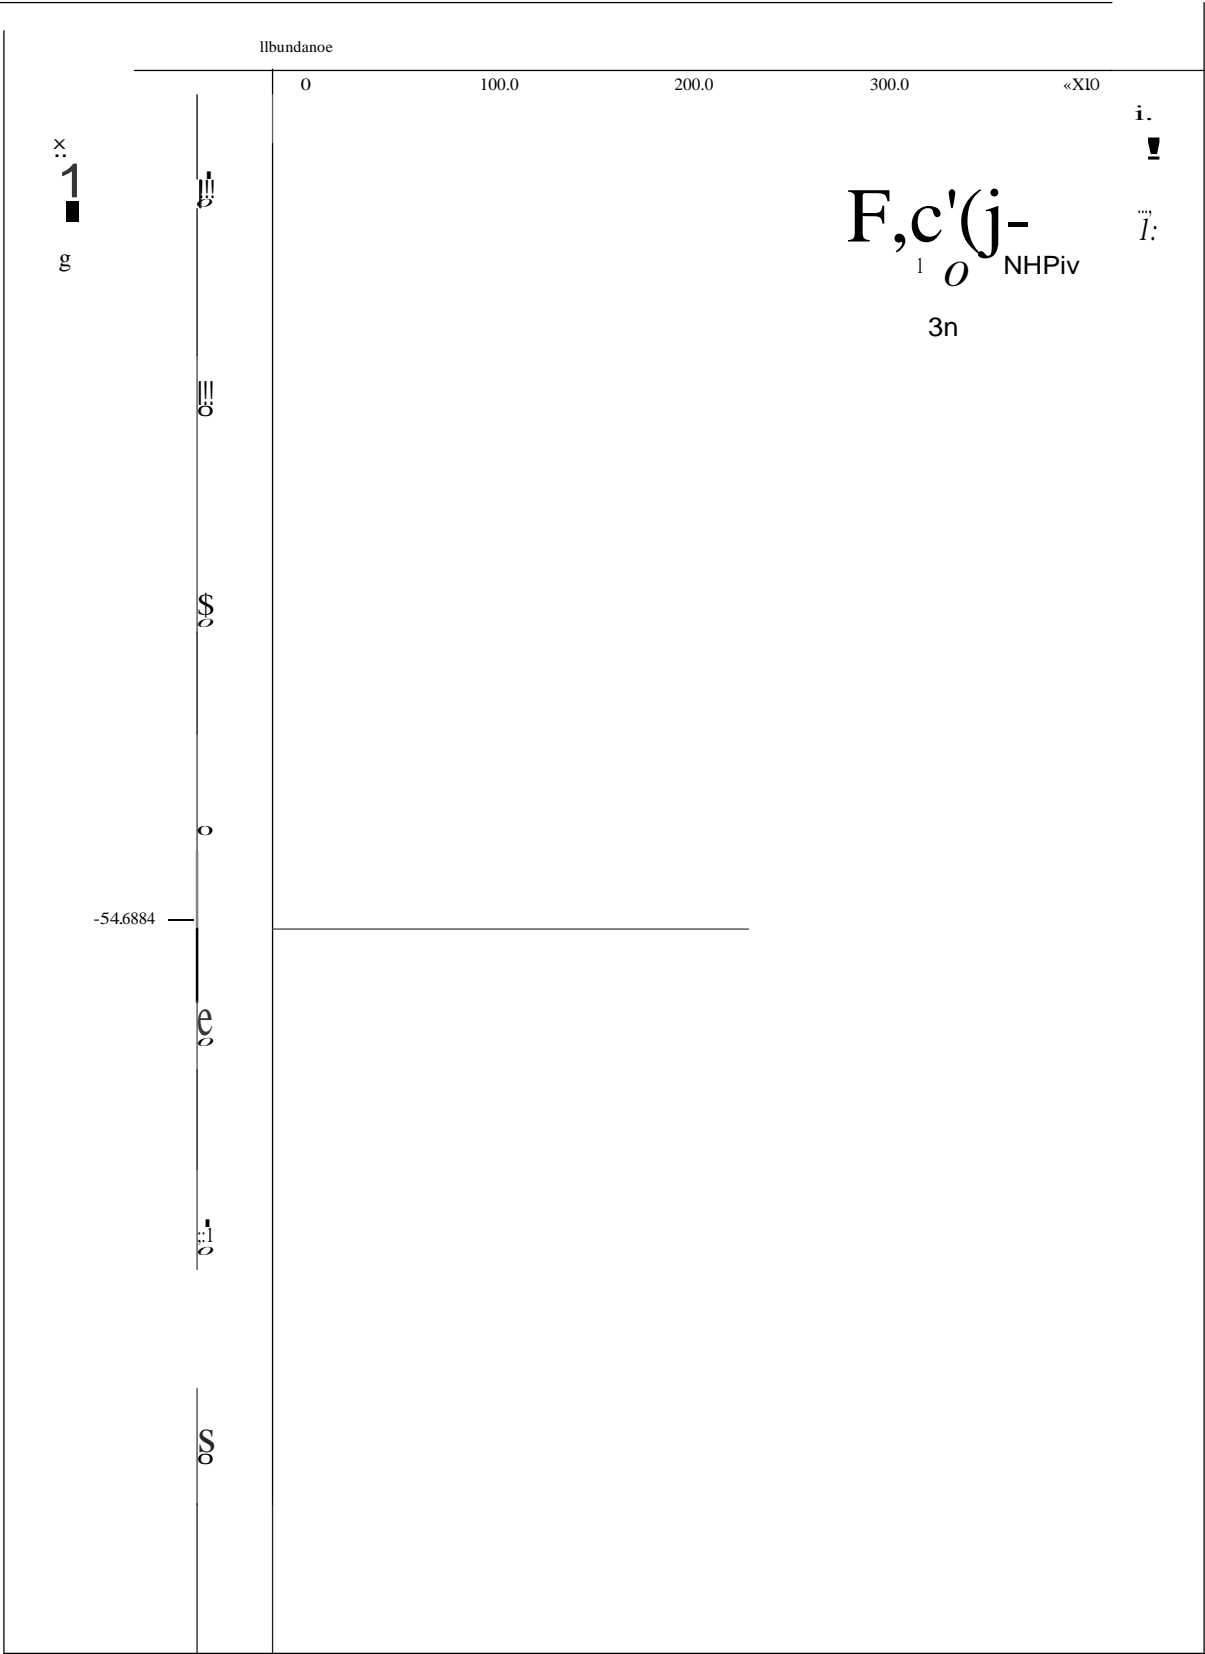

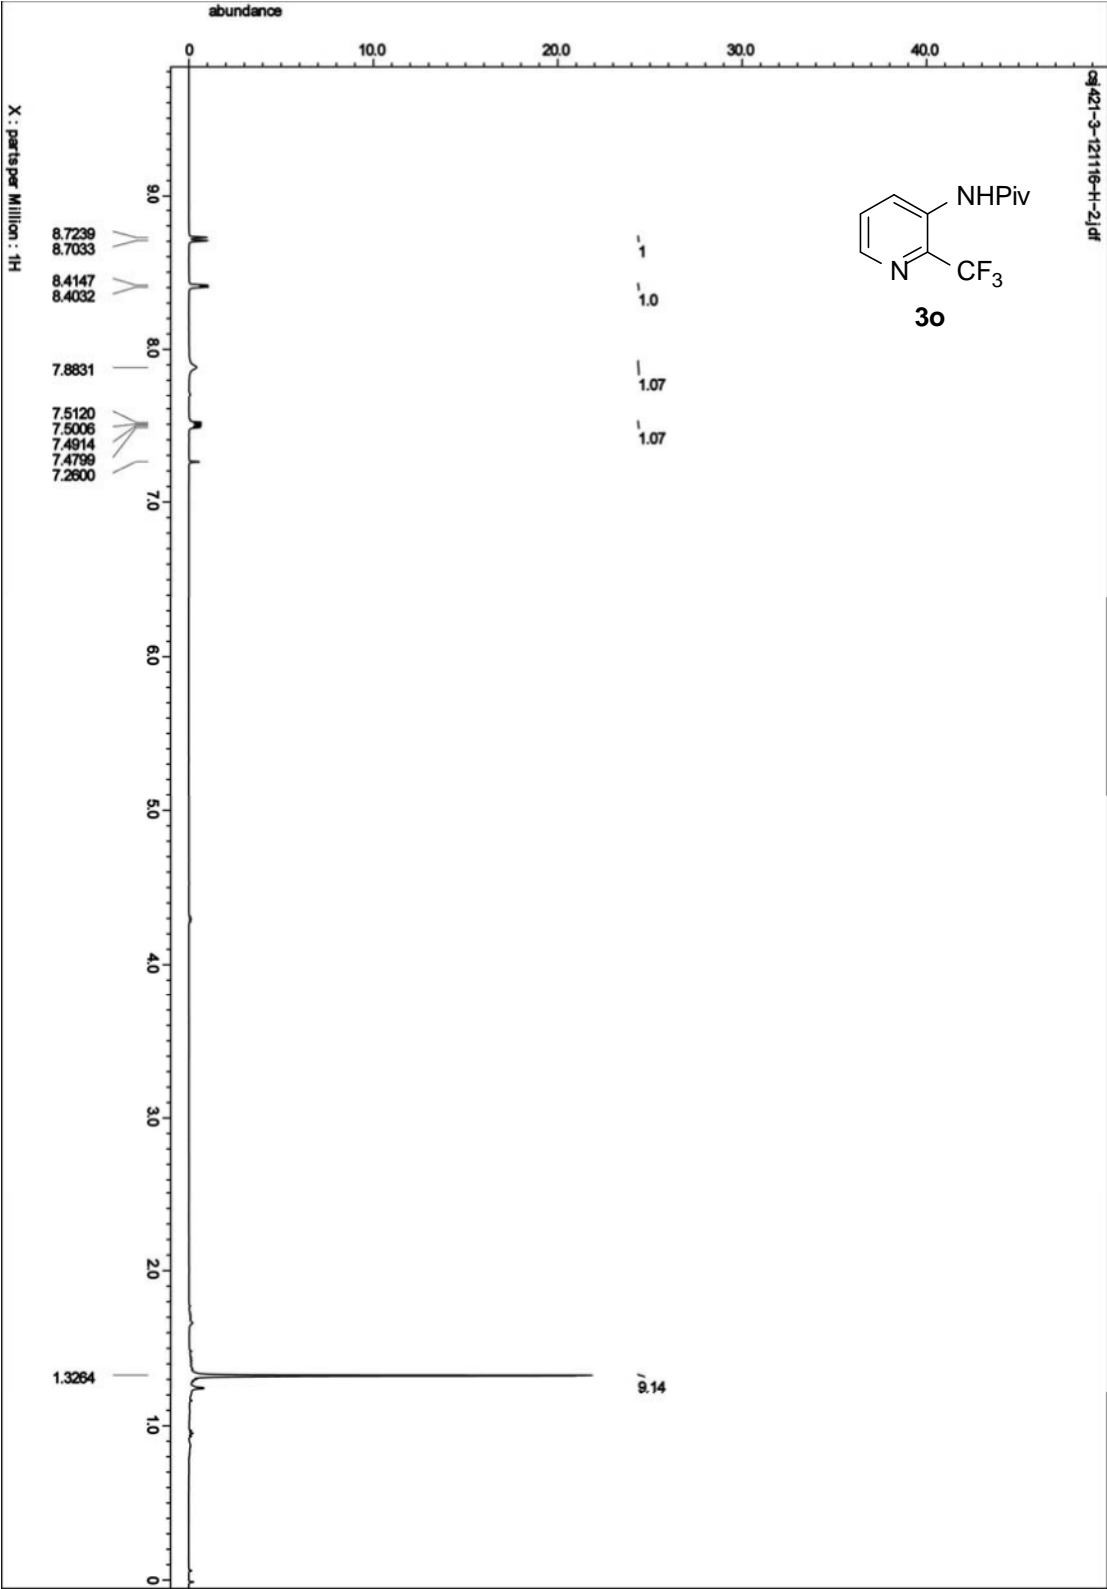

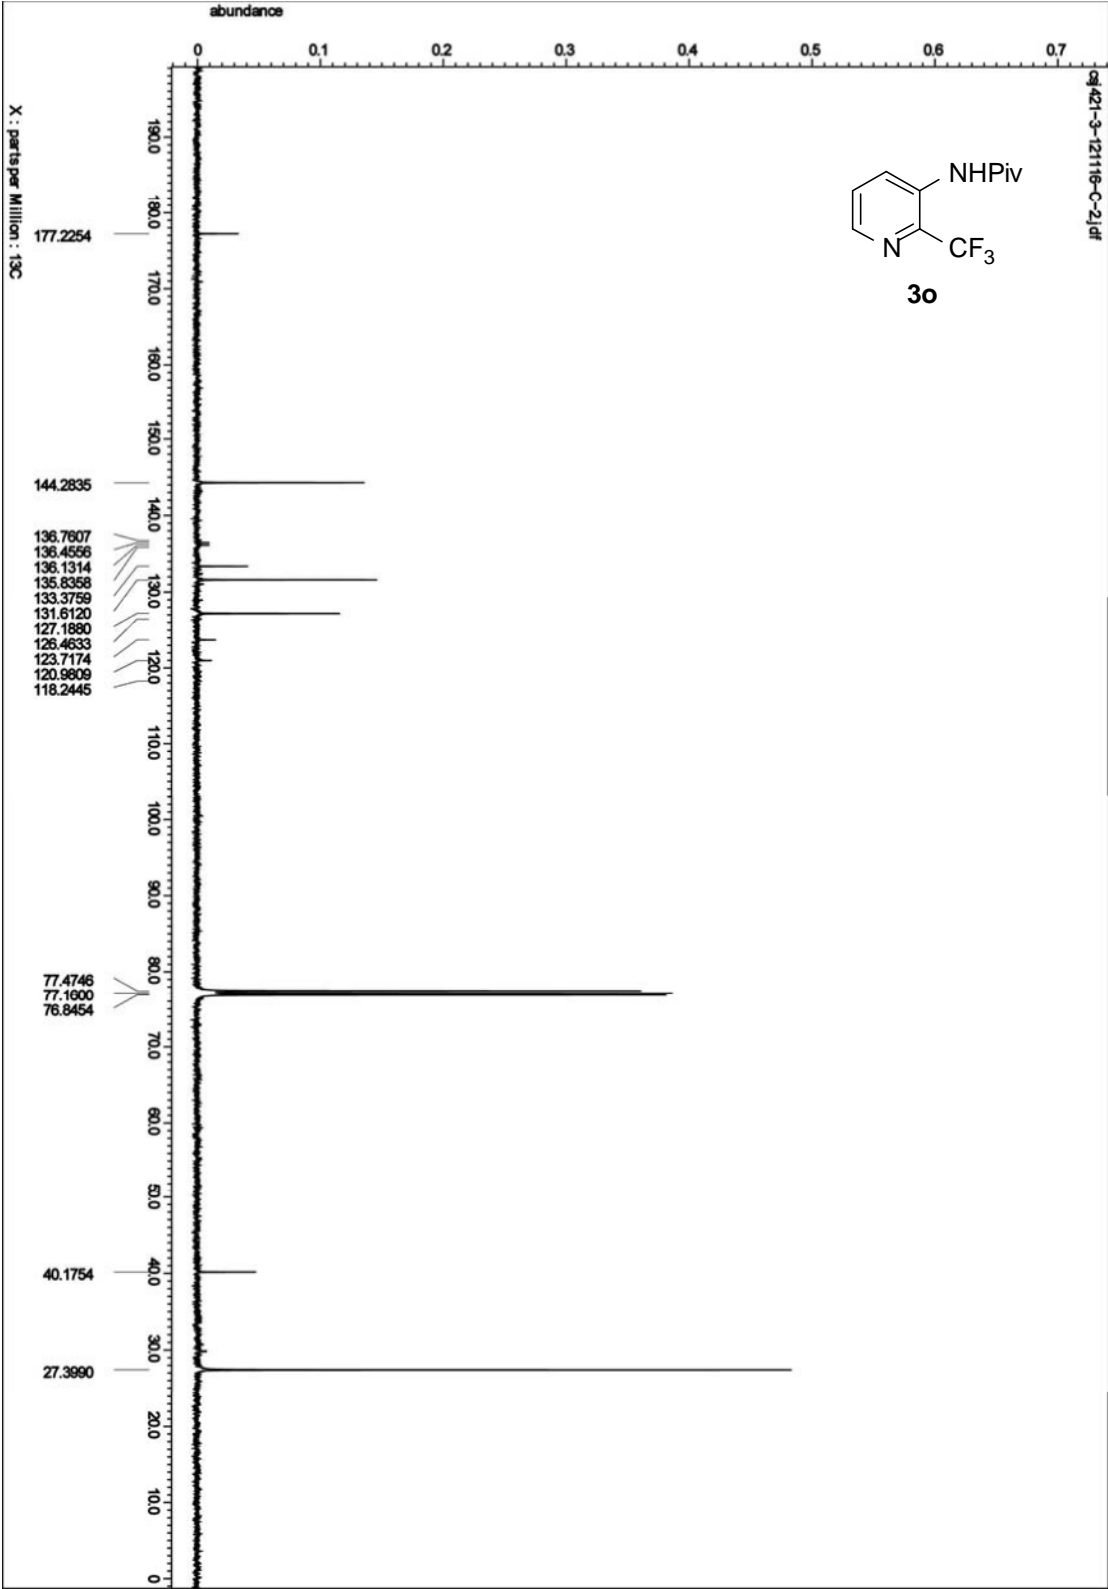

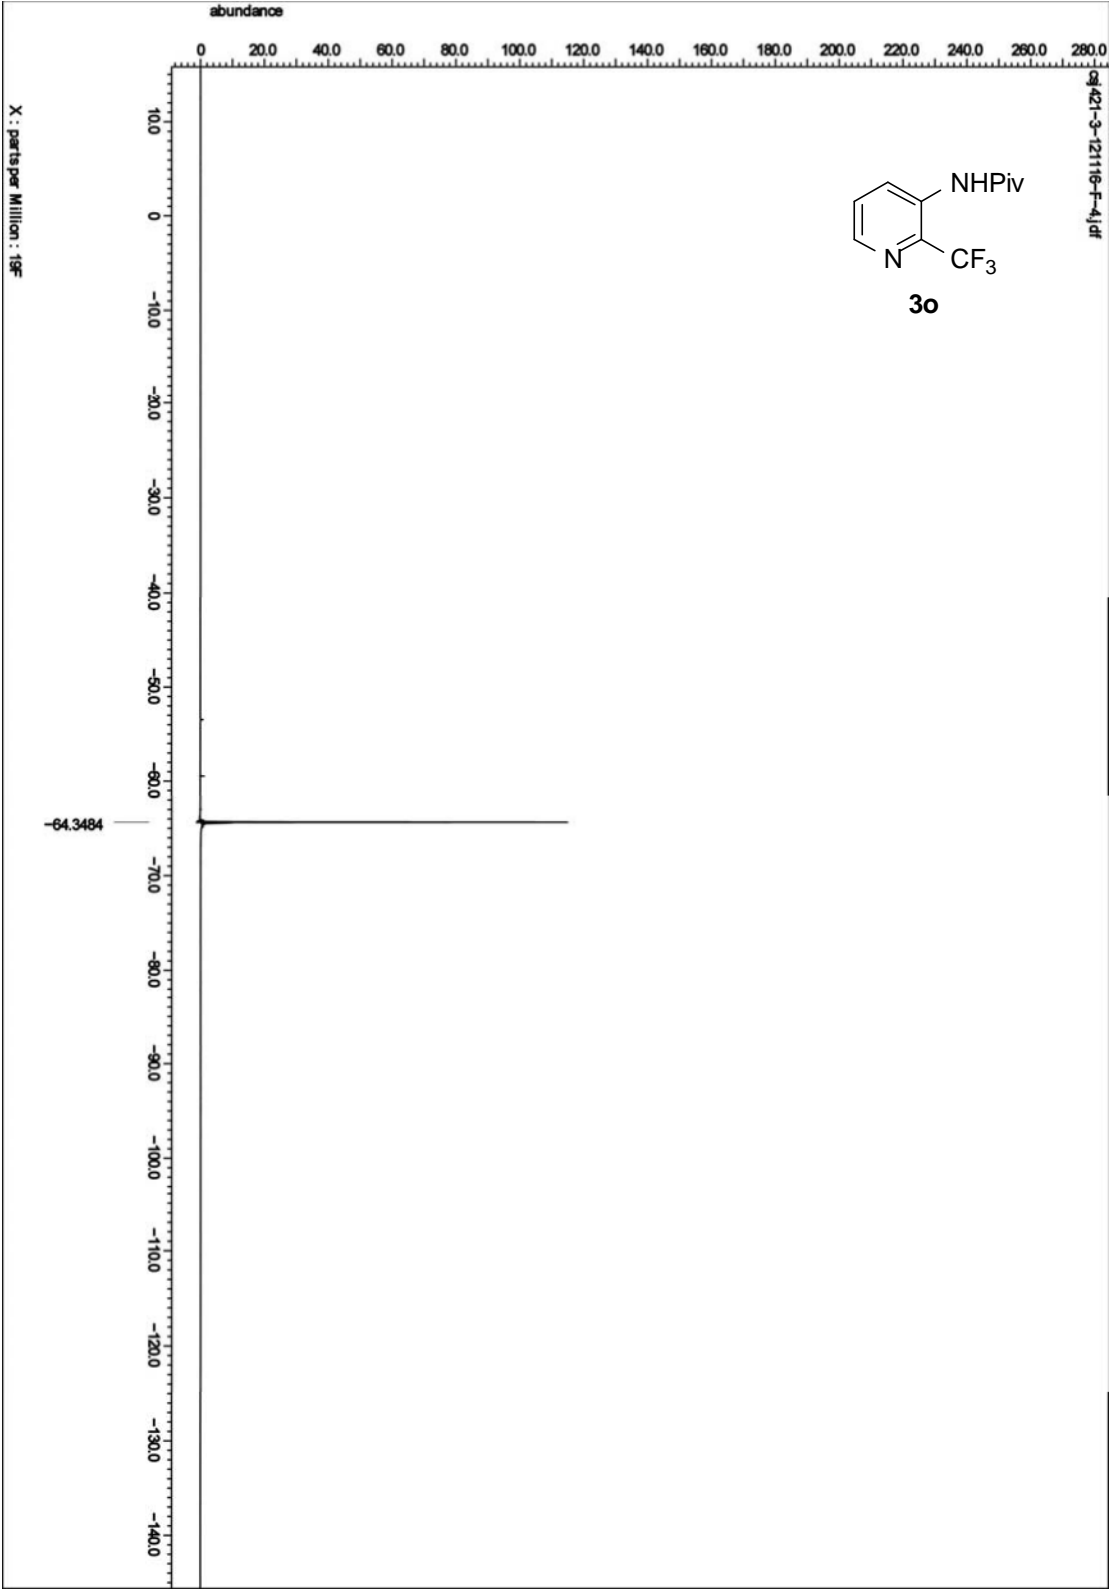

## 10. References:

1. A. T. Parsons and S. L. Buchwald, *Angew. Chem. Int. Ed.*, 2011, **123**, 9286.
2. K. Smith, G. A. El-Hiti, P. J. Gareth and H. Anna, *J. Chem. Soc., Perk. Trans. 1*, 1999, **16**, 2299.
3. S. Kaname and C. David, *Org. Lett.*, 2011, **13**, 2256.
